# 1 Predictive modeling reveals that 2 higher-order cooperativity drives 3 transcriptional repression in a 4 synthetic developmental enhancer

5 Yang Joon Kim<sup>1</sup>, Kaitlin Rhee<sup>2</sup>, Jonathan Liu<sup>4</sup>, Paul Jeammet<sup>5</sup>, Meghan Turner<sup>1</sup>,  
6 Stephen Small<sup>6</sup>, Hernan G. Garcia<sup>1 3 4 7\*</sup>

\*For correspondence:

[hggarcia@berkeley.edu](mailto:hggarcia@berkeley.edu) (HGG)

7 <sup>1</sup>Biophysics Graduate Group, University of California at Berkeley, Berkeley, CA 94720,  
8 USA; <sup>2</sup>Department of Chemical Biology, University of California at Berkeley, Berkeley, CA  
9 94720, USA; <sup>3</sup>Department of Molecular and Cell Biology, University of California at  
10 Berkeley, Berkeley, CA 94720, USA; <sup>4</sup>Department of Physics, University of California at  
11 Berkeley, Berkeley, CA 94720, USA; <sup>5</sup>Department of Biology, Ecole Polytechnique, PAR  
12 91128, France; <sup>6</sup>Department of Biology, New York University, New York, NY 10003, USA;  
13 <sup>7</sup>Institute for Quantitative Biosciences–QB3, University of California at Berkeley, Berkeley,  
14 CA 94720, USA

15

## 16 Abstract

17 A challenge in quantitative biology is to predict output patterns of gene expression from knowledge  
18 of input transcription factor patterns and from the arrangement of binding sites for these  
19 transcription factors on regulatory DNA. We tested whether widespread thermodynamic models  
20 could be used to infer parameters describing simple regulatory architectures that inform  
21 parameter-free predictions of more complex enhancers in the context of transcriptional repression  
22 by Runt in the early fruit fly embryo. By modulating the number and placement of Runt binding  
23 sites within an enhancer, and quantifying the resulting transcriptional activity using live imaging, we  
24 discovered that thermodynamic models call for higher-order cooperativity between multiple  
25 molecular players. This higher-order cooperativity capture the combinatorial complexity underlying  
26 eukaryotic transcriptional regulation and cannot be determined from simpler regulatory  
27 architectures, highlighting the challenges in reaching a predictive understanding of transcriptional  
28 regulation in eukaryotes and calling for approaches that quantitatively dissect their molecular  
29 nature.

30

## 31 1 Introduction

32 During embryonic development, transcription factors bind stretches of regulatory DNA termed  
33 enhancers to dictate the spatiotemporal dynamics of gene expression patterns that will lay out

34 the future body plan of multicellular organisms [*Spitz and Furlong, 2012, Small and Arnosti, 2020*].  
35 One of the greatest challenges in quantitative developmental biology is to predict these patterns  
36 from knowledge of the number, placement, and affinity of transcription factor binding sites within  
37 enhancers. The early embryo of the fruit fly *Drosophila melanogaster* has become one of the main  
38 workhorses in this attempt to achieve a predictive understanding of cellular decision-making in  
39 development due to its well-characterized gene regulatory network and transcription factor binding  
40 motifs, and the ease with which its development can be quantified using live imaging [*Garcia et al.,*  
41 *2020, Small and Arnosti, 2020, Rivera et al., 2019*].

42 Predictive understanding calls for the derivation of theoretical models that generate quantitative  
43 and experimentally testable predictions. Thermodynamic models based on equilibrium statistical  
44 mechanics have emerged as a widespread theoretical framework to achieve this goal [*Ackers et al.,*  
45 *1982, Vilar and Leibler, 2003, Bolouri and Davidson, 2003, Bintu et al., 2005b,a, Segal et al., 2008,*  
46 *Fakhouri et al., 2010, Sayal et al., 2016, Phillips et al., 2019, Eck et al., 2020*]. For instance, over  
47 the last decade, a dialogue between these thermodynamic models and experiments demonstrated  
48 the capacity to quantitatively predict bacterial transcriptional regulation from knowledge of the  
49 DNA regulatory architecture [*He et al., 2010, Garcia and Phillips, 2011, Brewster et al., 2014, Garcia*  
50 *et al., 2012, Sepulveda et al., 2016*].

51 The predictive power of these models is evident when inferring model parameters from simple  
52 regulatory architectures [*Boedicker et al., 2013a,b, Razo-Mejia et al., 2018, Phillips et al., 2019*].  
53 Consider, for example, that RNA polymerase II (RNAP)—which we take as a proxy for the whole  
54 basal transcriptional machinery—binds to a promoter with a dissociation constant  $K_p$ . When  
55 RNAP is bound, transcription is initiated at a rate  $R$  (Fig. 1A). In the absence of any regulation, a  
56 thermodynamic model will only have  $K_p$  and  $R$  as its free parameters which can be experimentally  
57 determined by, for example, measuring mRNA distributions [*Razo-Mejia et al., 2020*]. Now, we  
58 assume that the parameters  $K_p$  and  $R$  inferred in this step do not just enable a fit to the data, but  
59 that their values represent physical quantities that remain unaltered as more complex regulatory  
60 architectures are iteratively considered. As a result, when we consider the case where a single  
61 repressor molecule can bind, our model calls for only two new free parameters: a dissociation  
62 constant for repressor to its binding motif  $K_r$ , and a negative cooperativity between repressor and  
63 RNAP,  $\omega_{rp}$ , that makes the recruitment of RNAP less favorable when the repressor is bound to its  
64 binding site (Fig. 1B). Once again, after determining  $K_r$  and  $\omega_{rp}$  experimentally [*Phillips et al., 2019*],  
65 we consider the case where two repressors can bind simultaneously (Fig. 1C). If the repressors  
66 interact with RNAP independently of each other, then our model has no remaining free parameters  
67 such that we will have reached complete predictive power. However, protein-protein interactions  
68 between repressors could exist or even higher-order interactions giving rise to a repressor-repressor-  
69 RNAP ternary complex might be present. The extra complexity represented by these interactions  
70 would require yet another round of experimentation to quantify these interactions represented by  
71  $\omega_{rr}$  and  $\omega_{rrp}$  in Figure 1C, respectively. Even after quantifying these parameters, predictive power  
72 might not be reached if, after adding yet another repressor binding site, a complex between all  
73 three repressors and RNAP can be formed (Fig. 1D).

74 While protein-protein cooperativity captured by  $\omega_{rr}$  has been studied both in bacteria [*Ackers*  
75 *et al., 1982, Ptashne and Gann, 2002*] and eukaryotes [*Giniger and Ptashne, 1988, Ma et al., 1996,*  
76 *Lebrecht et al., 2005, Parker et al., 2011, Fakhouri et al., 2010, Sayal et al., 2016*], the necessity of  
77 accounting for the higher-order interactions such as those described in our example by the  $\omega_{rrp}$  and  
78  $\omega_{rrrp}$  terms had only been demonstrated in archaee [*Peeters et al., 2013*] and bacteria [*Dodd et al.,*  
79 *2004*]. The need to invoke this higher-order cooperativity in eukaryotes only became apparent in  
80 the last few years [*Estrada et al., 2016b, Park et al., 2019, Biddle et al., 2020*]. These higher-order

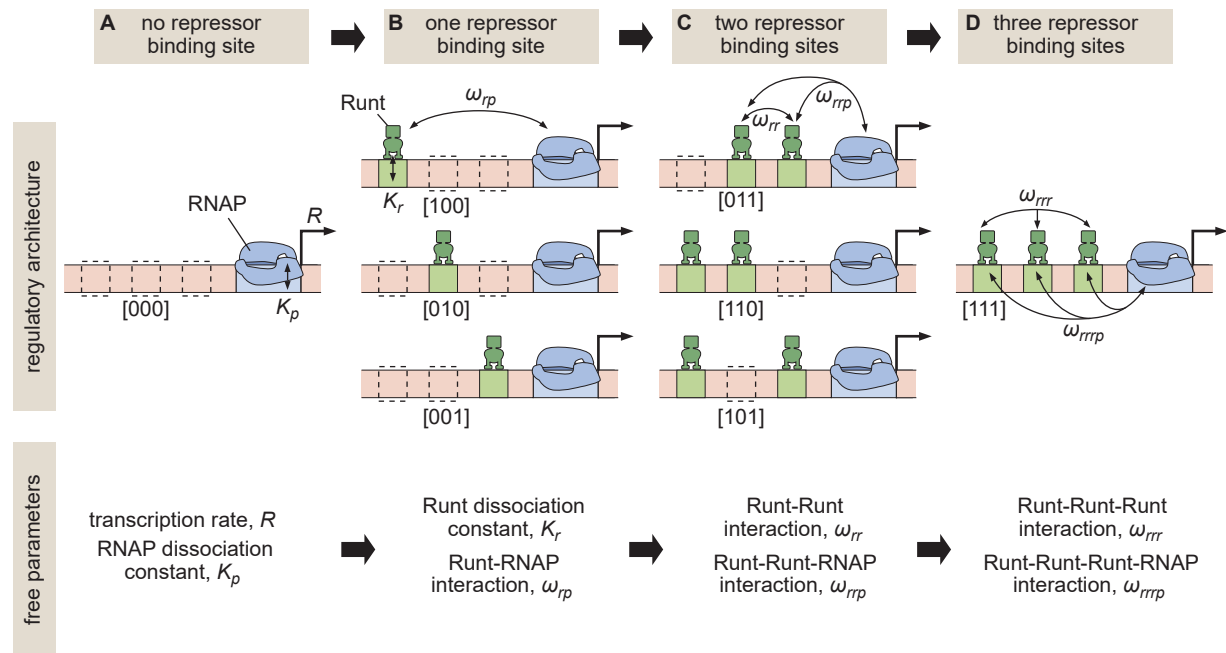

**Figure 1.** Building up predictive models of transcriptional repression. **(A)** In the absence of repressor binding, gene expression can be characterized by a dissociation constant between RNAP and the promoter  $K_p$  and the rate of transcription initiation when the promoter is bound by RNAP  $R$ . **(B)** In the presence of a single repressor binding site, models need to account for two additional parameters describing the repressor dissociation constant  $K_r$ , and a repressor-RNAP interaction term  $\omega_{rp}$ . **(C)** For two-repressor architectures, parameters accounting for repressor-repressor interactions  $\omega_{rr}$  and for interactions giving rise to a repressor-repressor-RNAP complex could also have to be incorporated. **(D)** For the case of three repressor binding sites, additional parameters  $\omega_{rrr}$  and  $\omega_{rrpp}$  capturing the higher-order cooperativity between three repressor molecules and between three Runt molecules and RNAP, respectively, could be necessary. Note the nomenclature shown below each construct, which indicates which Runt binding sites are present in each construct.

81 cooperativities might be necessary in order to account for the complex interactions mediated by,  
82 for example, the recruitment of co-repressors [Courey and Jia, 2001, Walrad et al., 2011], mediator  
83 complex [Park et al., 2019], or any other element of the transcriptional machinery. As a result,  
84 while posing a challenge to reaching a parameter-free predictive understanding of transcriptional  
85 regulation, higher-order cooperativity provides an avenue for quantifying the complexity of the  
86 molecular processes underlying eukaryotic cellular decision-making.

87 In this paper, we sought to test whether an iterative and predictive approach, such as that outlined  
88 in Figure 1, was possible for transcriptional repression in the early embryo of the fruit fly *Drosophila*  
89 *melanogaster* or whether it is necessary to invoke higher-order cooperativities that challenge the  
90 reach of our predictive models as we add more complexity to the system. To make this possible, we  
91 engineered binding sites for the Runt repressor into the Bicoid-activated *hunchback* P2 minimal  
92 enhancer. We systematically varied the number and placement of Runt binding sites within this  
93 enhancer [Chen et al., 2012] in order to determine whether model fits to real-time transcriptional  
94 measurements from the enhancer constructs containing only one-Runt binding site could accurately  
95 predict repression in two- and three-Runt binding site constructs (Fig. 1A and B). We found that  
96 a thermodynamic model can recapitulate all our data. However, we also discovered that, while  
97 the model could describe repression by a single Runt repressor, protein-protein and higher-order  
98 cooperativities had to be invoked in order to quantitatively account for regulation by two or  
99 more repressor molecules. While these higher-order cooperativities limit the iterative bottom-up  
100 discourse between theory and experiment that has been successful in bacteria [Phillips et al.,  
101 2009], they also provide a concrete theoretical framework for quantifying the complexities behind  
102 eukaryotic transcriptional control, and calling for the development of new theories and experiments  
103 specifically conceived to uncover the the molecular underpinnings of this complexity.

## 104 2 Results

### 105 2.1 Predicting transcription rate using a thermodynamic model of Bicoid activation 106 and Runt repression

107 We built a predictive model of Runt repression on the Bicoid-activated *hunchback* P2 enhancer using  
108 the thermodynamic model framework [Phillips et al., 2019, Bintu et al., 2005b,a] with the goal of  
109 predicting the rate of transcription initiation as a function of input transcription factor concentration,  
110 and the number and placement of Runt repressor binding sites. Our model rests on the “occupancy  
111 hypothesis” that states that the rate of mRNA production,  $d[mRNA]/dt$ , is proportional to the  
112 probability of the promoter being bound by RNA polymerase II (RNAP),  $p_{bound}$ , such that

$$\frac{d [mRNA]}{dt} = R p_{bound}, \quad (1)$$

113 where  $R$  is the rate of mRNA production when the promoter is occupied by RNAP. Note that,  
114 throughout this study, we treat the rate of transcription initiation and the rate of RNAP loading  
115 interchangeably.

116 To generate intuition, we start by modeling the case of *hunchback* P2 with one Runt binding site.  
117 Figure 2A illustrates the possible states the system can be found in. Each state has an associated  
118 statistical weight which can be calculated as prescribed by equilibrium statistical mechanics [Bintu  
119 et al., 2005b,a]. Here, we assume that there are six Bicoid binding sites with the same dissociation  
120 constant given by  $K_b$ , one Runt binding site with a dissociation constant specified by  $K_r$ , and a  
121 promoter with a dissociation constant for RNAP prescribed by  $K_p$ . In the absence of Runt, we  
122 consider four states as shown in the top two rows of Figure 2A. Here, we assume that Bicoid-Bicoid  
123 cooperativity is so strong that the enhancer can either be unoccupied or completely bound by Bicoid

124 molecules [Gregor et al., 2007, Park et al., 2019]. Further, we consider an interaction between  
 125 Bicoid and RNAP given by  $\omega_{bp}$ . For simplicity, we use the dimensionless parameters  $b = [Bicoid]/K_b$ ,  
 126  $r = [Runt]/K_r$ , and  $p = [RNAP]/K_p$ . These assumptions lead to a functional form reminiscent of a Hill  
 127 function that explains the sharp step-like expression pattern along the embryo's anterior-posterior  
 128 axis of the *hunchback* gene [Gregor et al., 2007, Park et al., 2019, Driever and Nusslein-Volhard,  
 129 1988, 1989]. A full thermodynamic model in which we do not make this assumption of high Bicoid-  
 130 Bicoid cooperativity is discussed in detail in Section S1 and Section S2.

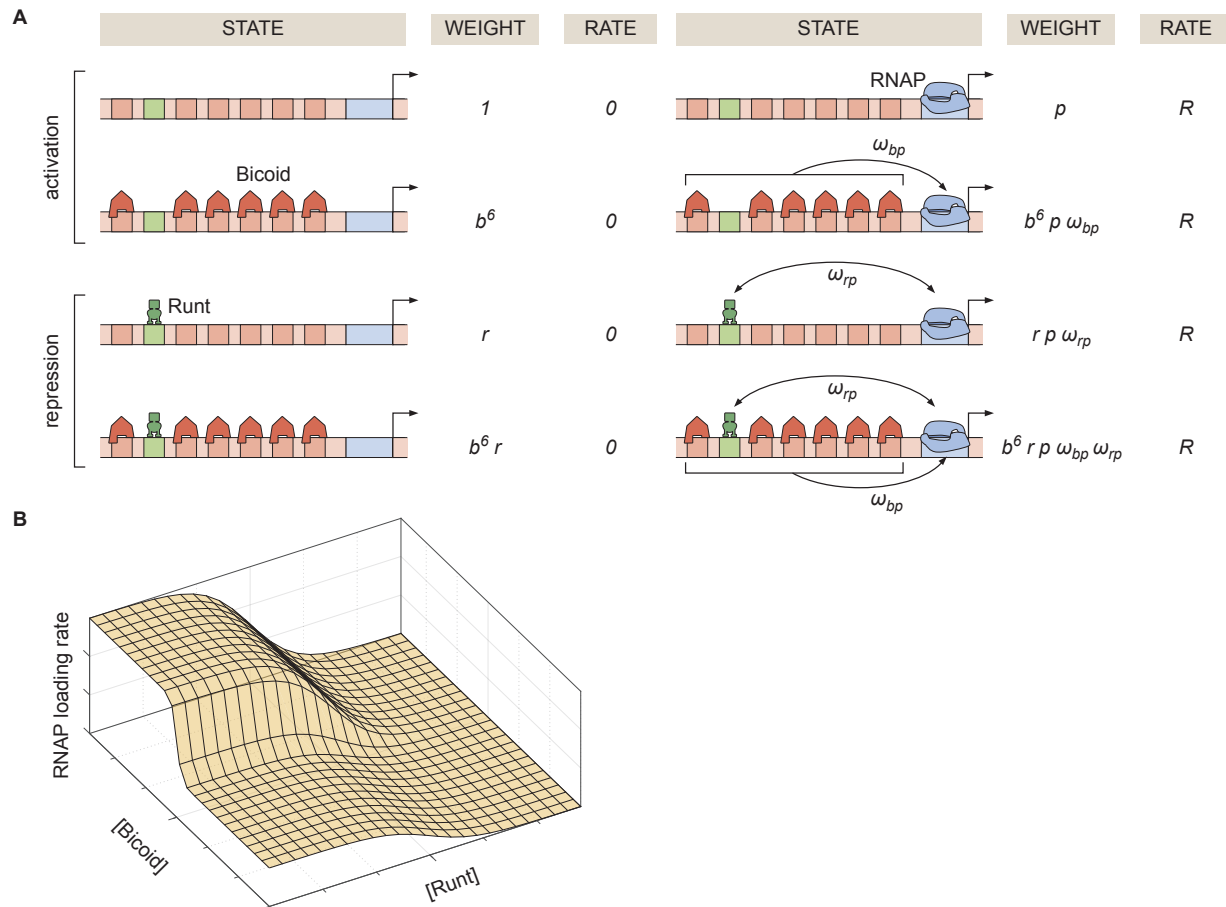

**Figure 2.** Thermodynamic model of transcriptional regulation by Bicoid activator and Runt repressor. **(A)** States and statistical weights for the regulation of *hunchback* P2 with one Runt binding site in the limit of strong Bicoid-Bicoid cooperativity. Here, we use the dimensionless parameters  $b = [Bicoid]/K_b$ ,  $r = [Runt]/K_r$ , and  $p = [RNAP]/K_p$ , where  $K_b$ ,  $K_r$ , and  $K_p$  are the dissociation constants of Bicoid, Runt, and RNAP, respectively.  $\omega_{bp}$  represents the cooperativity between Bicoid and RNAP,  $\omega_{rp}$  captures the cooperativity between Runt and RNAP, and  $R$  represents the rate of transcription when the promoter is occupied by RNAP. The top two rows correspond to states where only Bicoid and RNAP act, while the bottom two rows represent repression by Runt. **(B)** Representative prediction of RNAP loading rate as a function of Bicoid and Runt concentrations for  $\omega_{bp} = 3$ ,  $\omega_{rp} = 0.001$ ,  $p = 0.001$ ,  $R = 1 (AU/min)$ .

131 The molecular mechanism by which Runt downregulates transcription of its target genes remains  
 132 unclear [Chen et al., 2012, Hang and Gergen, 2017, Koromila and Stathopoulos, 2017, 2019]. Here,  
 133 we assume the so-called “direct repression” model [Gray et al., 1994] that posits that Runt operates  
 134 by inhibiting RNAP binding to the promoter through a direct Runt-RNAP interaction term given by  
 135  $\omega_{rp} < 1$  independently of Bicoid. As a result, in the presence of Runt, we consider four additional  
 136 states as shown in the bottom two rows of Figure 2A. Other potential mechanisms of Runt repression

137 are further discussed in Supplementary Section S5), where we also show that the choice of specific  
138 mechanism does not change our conclusions.

139 Given these assumptions, we arrive at the microstates and corresponding statistical weights shown  
140 in Figure 2A. The probability of finding RNAP bound to the promoter,  $p_{bound}$ , is calculated by dividing  
141 the sum of all statistical weights featuring RNAP by the sum of the weights of all possible microstates.  
142 The calculation of  $p_{bound}$  combined with Equation 1 leads to the expression

$$Rate = R p_{bound} = R \frac{p + b^6 p \omega_{bp} + r p \omega_{rp} + b^6 r p \omega_{bp} \omega_{rp}}{1 + b^6 + r + b^6 r + p + b^6 p \omega_{bp} + r p \omega_{rp} + b^6 r p \omega_{bp} \omega_{rp}}, \quad (2)$$

143 which makes it possible to predict the output rate of mRNA production as a function of the  
144 input concentrations of Bicoid and Runt (Fig. 2B). With this theoretical framework in hand, we  
145 experimentally tested the predictions of this model.

## 146 2.2 Measuring transcriptional input-output to test model predictions

147 The transcriptional input-output function in Figure 2B indicates that, in order to predict the rate of  
148 RNAP loading and to test our theoretical model, we need to first measure the concentration of the  
149 input Bicoid and Runt transcription factors. In order to quantify the concentration profile of Bicoid,  
150 we used an established eGFP-Bicoid line [Gregor et al., 2007] and measured mean Bicoid nuclear  
151 concentration dynamics along the anterior-posterior axis of the embryo over nuclear cycles 13  
152 and 14 (nc13 and nc14, respectively) as shown in Movie S1 [Eck et al., 2020]. An example snapshot  
153 and time trace of Bicoid nuclear concentration dynamics at 40% of the embryo length appear in  
154 Figure 3A and B.

155 Quantification of the Runt concentration using standard fluorescent protein fusions is not possible  
156 due to the slow maturation times of these proteins [Bothma et al., 2018]. We therefore measured  
157 Runt concentration dynamics using our recently developed LlamaTags, which are devoid of such  
158 maturation dynamics artifacts [Bothma et al., 2018]. Specifically, we generated a new fly line  
159 harboring a fusion of a LlamaTag against eGFP to the endogenous *runt* gene using CRISPR/Cas9-  
160 mediated homology-directed repair (Materials and Methods; Harrison et al. [2010], Gratz et al.  
161 [2015]).

162 Using this LlamaTag fusion, we measured the mean Runt nuclear fluorescence along the anterior-  
163 posterior axis of the embryo over nc13 and nc14 (Materials and Methods; Figure 3B; Movie S2).  
164 As expected due to the location of the *runt* gene on the X chromosome [Lott et al., 2011], there is  
165 a sex dependence in the nuclear concentration levels in nc13, with males displaying lower Runt  
166 levels than females; this difference is compensated by early nc14 (Fig. 3C,D). As a result, for ease of  
167 analysis, we focused subsequent quantitative dissection on nc14.

168 We used the measured input protein concentration profiles to predict the output transcription rate.  
169 To make this possible, we invoked previous observations stating that the concentration dynamics of  
170 input transcription factors does not significantly affect the initial rate of RNAP loading [Garcia et al.,  
171 2013, Eck et al., 2020]. As a result, we decided to use the time-averaged concentration dynamics of  
172 Bicoid and Runt over a time window spanning 5 min after the 13th anaphase to 10 min after this  
173 anaphase (gray shaded region in Fig. 3B and D) as inputs to our model, resulting in static spatial  
174 concentration profiles shown in Figure 3E. We then used these time-averaged concentration profiles  
175 of input transcription factors to calculate the time-averaged rate of transcription initiation over the  
176 same time window. In the Supplementary Information Section S3 we compare this methodology  
177 with one that acknowledges input transcription factor concentration dynamics and show that the  
178 prediction stemming from both approaches leads to equivalent theoretical predictions. Notably,

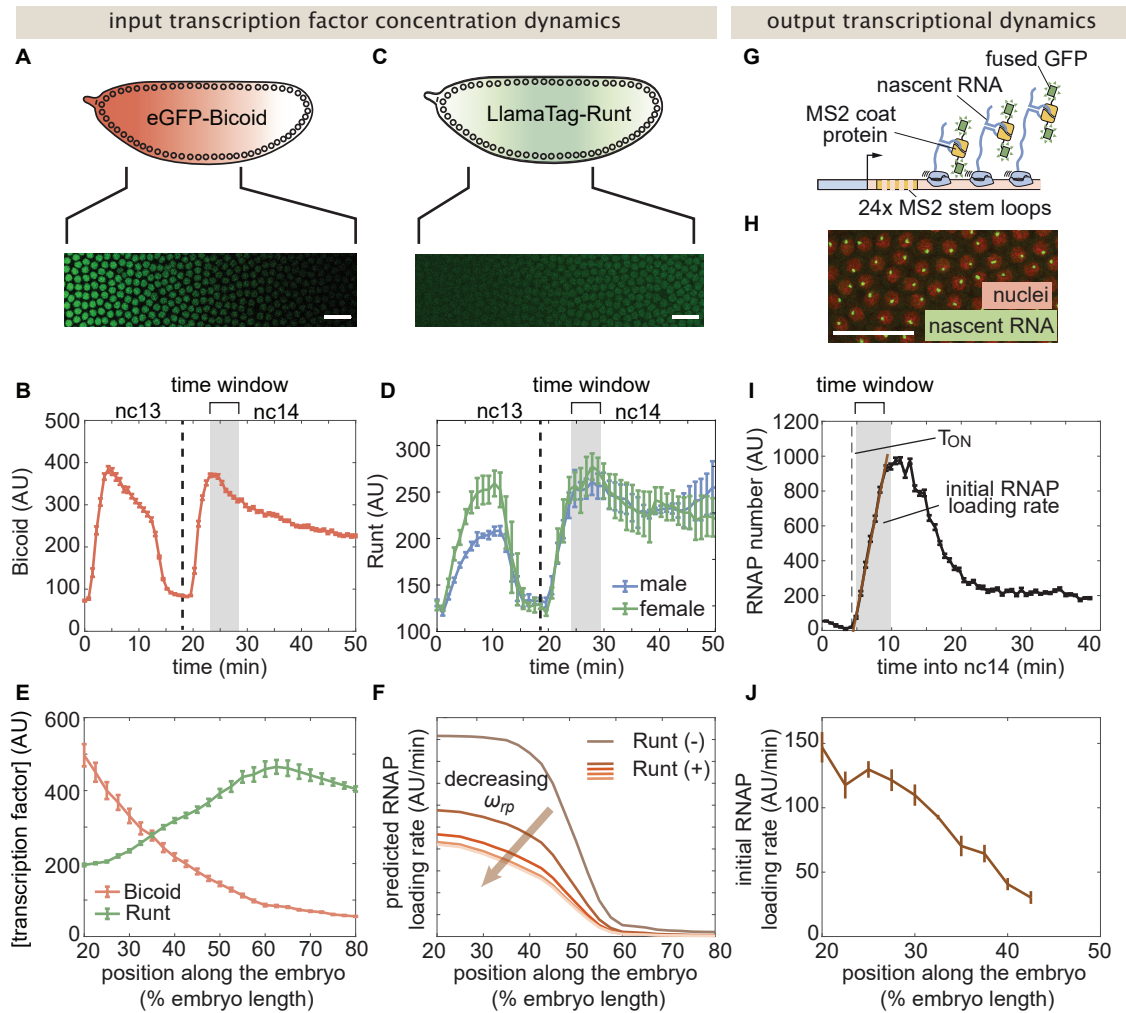

**Figure 3.** Measurement of input transcription factor concentrations and output rate of transcription to test model predictions. **(A)** Snapshot of an embryo expressing eGFP-Bicoid spanning 20-60% of the embryo length. (For a full time-lapse movie, see Movie S1.) **(B)** Bicoid nuclear fluorescence dynamics taken at 40% of the embryo. **(C)** Snapshot of an embryo expressing eGFP:LlamaTag-Runt spanning 20-60% of the embryo length. (For a full time-lapse movie, see Movie S2.) **(D)** Runt nuclear concentration dynamics in males and females. **(E)** Measured transcription factor concentration profiles along the anterior-posterior axis of the embryo. The concentration profiles are averaged over the gray shaded regions shown in (B) and (D) which corresponds to a time window between 5 and 10 minutes into nc14. **(F)** Predicted RNAP loading rate for *hunchback* P2 with one Runt binding site over the anterior-posterior axis generated for a reasonable set of model parameters  $K_b = 30$  AU,  $K_r = 100$  AU,  $\omega_{bp} = 100$ ,  $p = 0.001$ , and  $R = 1$  AU/min for varying values of the Runt-RNAP interaction term  $\omega_{rp} = [10^{-2}, 1]$ . **(G)** Schematic of the MS2 system where 24 repeats of the MS2 loop sequence are inserted downstream of the promoter followed by the *lacZ* gene. The MS2 coat protein (MCP) fused to GFP binds the MS2 loops. **(H)** Example snapshot of an embryo expressing MCP-GFP and Histone-RFP. Green spots to active transcriptional loci and red circles correspond to nuclei. Spot intensities are proportional to the number of actively transcribing RNAP molecules. **(I)** Representative MS2 fluorescence averaged over a narrow window (2.5% of the embryo length) along the anterior-posterior axis of the embryo. The initial rate of RNAP loading was obtained by fitting a line (brown) to the initial rise of the data. **(J)** Measured initial rate of RNAP loading (over a spatial bin of 2.5% of the embryo length) across the anterior-posterior axis of the embryo, from the *hunchback* P2 enhancer. (B, D, E, and J, error bars represent standard error of the mean over  $\geq 3$  embryos; I, error bars represent standard error of the mean over the spatial averaging corresponding to roughly ten nuclei; A, C, and H, white scale bars represent 20  $\mu\text{m}$ .)

179 the time-averaged rate of transcription predicted by the dynamic inputs was similar to the rate of  
180 transcription predicted by the static inputs.

181 Along the anterior-posterior axis of the embryo, the measured Bicoid and Runt concentration  
182 profiles define a trajectory through the input-output function (Fig. 2B). Given a set of parameters,  
183 this trajectory predicts the initial rate of RNAP loading. This quantitative prediction can be directly  
184 compared with experimentally measured transcription initiation rates. For example, given the  
185 concentration profiles shown in Figure 3E, we calculate the RNAP loading rate as a function of  
186 the position along the embryo for different values of the Runt-RNAP interaction, captured by  
187  $\omega_{rp}$  (Fig. 3F). As expected, we predict that the rate of transcription decreases as  $\omega_{rp}$ , describing  
188 Runt-RNAP cooperativity, decreases.

189 Next, we sought to experimentally test these predictions by measuring the rate of RNAP loading  
190 using the MS2 system [Bertrand et al., 1998, Lucas et al., 2013, Garcia et al., 2013]. Here, we  
191 inserted 24 repeats of the MS2 loop sequence following the *hunchback* P2 enhancer and *even-*  
192 *skipped* promoter in our reporter construct, which leads to the fluorescent labeling of sites of active  
193 transcription in living embryos (Fig. 3G and H; Movie S3). The fluorescence intensity of each MS2  
194 spot is proportional to the number of actively transcribing RNAP molecules [Garcia et al., 2013].  
195 In order to quantify the transcriptional activity reported by MS2, we measured the mean MS2  
196 spot fluorescence over nuclei in a narrow spatial window (Fig. 3I [Garcia et al., 2013, Eck et al.,  
197 2020]). To measure the initial rate of RNAP loading, we obtained the slope of the initial rise in the  
198 number of actively transcribing RNAP molecules over the same time window used to average input  
199 transcription factor concentration (Fig. 3I, brown line). The resulting RNAP loading rate plotted  
200 over the anterior-posterior axis is in qualitative agreement with the classic pattern driven by the  
201 *hunchback* P2 minimal enhancer (Fig. 3J; Garcia et al. [2013], Chen et al. [2012], Park et al. [2019]).

202 While we chose the initial rate of transcription as the experimental measurable to confront against  
203 our model predictions, the MS2 technique can also report on other dynamical features of transcrip-  
204 tion such as the time window over which transcription occurs and the fraction of loci that engage in  
205 transcription at any point over the nuclear cycle. While these two quantities have been shown to  
206 be relevant in shaping gene expression patterns in other regulatory contexts [Garcia et al., 2013,  
207 Lammers et al., 2020, Eck et al., 2020, Dufourt et al., 2018, Reimer et al., 2021], we found that the  
208 transcription time window was not significantly regulated in the presence of Runt. As described  
209 in Section S8, we did find some modulation of the fraction of transcriptionally engaged loci for a  
210 subset of our synthetic enhancer constructs but, as we could not detect a clear trend in how this  
211 fraction of active loci was modulated, we did not pursue a theoretical dissection of the control of  
212 this quantity by Runt.

### 213 **2.3 Enhancer sequence dictates unrepressed transcription rates by determining** 214 **RNAP-promoter interactions**

215 A major assumption of our theoretical approach is that the model parameters obtained from simple  
216 regulatory architectures can be used as inputs for more complex constructs. For instance, we  
217 assume that the Runt-independent model parameters for Bicoid and RNAP action— $K_b$ ,  $\omega_{bp}$ ,  $p$  and  $R$   
218 (Fig. 2A)—are conserved for all constructs containing Runt binding sites regardless of their number  
219 and placement in the enhancer. If model parameters can be shared across constructs, then our  
220 model should predict the same profile for the rate of transcription across all synthetic enhancer  
221 constructs.

222 To test this assumption, we measured the initial rate of RNAP loading in all of our reporter constructs,  
223 in *runt* null embryos (Materials and Methods). Notably, unrepressed transcription rates varied



224 significantly across synthetic enhancers (Fig. 4A). For example, despite no Runt being present, the  
225 [001] construct had almost twice the unrepressed rate of [000].

226 This large construct-to-construct variability in unrepressed transcription rates likely originates from  
227 the Runt binding site sequences interfering with some combination of Bicoid and RNAP function.  
228 To uncover the mechanistic effect of these Runt binding sites sequences on unrepressed activity,  
229 we sought to determine which parameters in our thermodynamic model varied across constructs.  
230 In the absence of Runt repressor, only four states remain corresponding to the two top rows of  
231 Figure 2A. In this limit, the predicted rate of transcription is given by

$$\text{Rate} = R \frac{p + b^6 p \omega_{bp}}{1 + p + b^6 + b^6 p \omega_{bp}}, \quad (3)$$

232 where we have invoked the same parameters as in Equation 2.

233 To obtain the model parameters for each construct measured in Figure 4A, we used the Bayesian  
234 inference technique of Markov Chain Monte Carlo (MCMC) sampling that has been widely used for  
235 inferring the biophysical parameters from theoretical models ([Liu et al. \[2021\]](#), [Razo-Mejia et al.  
236 \[2018\]](#), [Geyer and Thompson \[1992\]](#); Supplementary Section S4). A representative comparison of  
237 the MCMC fit to the experimental data reveals good agreement between theory and experiment  
238 (Fig. 4B). MCMC sampling also gives the distribution of the posterior probability for each parameter  
239 as well as their cross-correlation (Fig. 4C). These corner plots reveal relatively unimodal posterior  
240 distributions, suggesting that a unique set of parameters can explain the data.

241 Note that, while the Bicoid dissociation constant  $K_b$  and the Bicoid-RNAP interaction term  $\omega_{bp}$  remain  
242 largely unchanged regardless of enhancer sequence, there is considerable variability in the inferred  
243 mean RNAP-dependent parameters  $p$  and  $R$  (Fig. 4D). This variability can be further quantified by  
244 examining the coefficient of variation,

$$CV = \frac{\sigma}{\mu}, \quad (4)$$

245 where  $\sigma$  and  $\mu$  are the standard deviation and the mean of each parameter, respectively, calculated  
246 over all constructs. The coefficients of variation for the RNAP and promoter-dependent parameters  
247 are much higher than those for Bicoid-dependent parameters ( $\approx 40\%$  versus  $< 10\%$ ; Fig. 4E). This  
248 suggests that the variability in unrepressed transcription rates due to the presence of Runt binding  
249 sites is due to differences in the behavior of RNAP at the promoter rather than differences in Bicoid  
250 binding or activation being. As a result, as we consider increasingly more complex regulatory archi-  
251 tectures, each construct will necessitate its own specific Bicoid- and RNAP-dependent parameters  
252 as inferred in Figure 4D. However, we will conserve Runt-dependent parameters as we consider  
253 increasingly more complex constructs featuring more Runt binding sites.

#### 254 **2.4 The thermodynamic model recapitulates repression by one Runt binding site**

255 Next, we asked whether our model recapitulates gene expression for the *hunchback* P2 enhancer  
256 with a one-Runt binding site in the presence of Runt repressor as predicted by Equation 2. We  
257 posited that, since the binding site sequence remains unaltered throughout our constructs (Fig. S9),  
258 the value of the Runt dissociation constant  $K_r$  would also remain unchanged across these enhancers  
259 regardless of Runt binding site position; however, we assumed that, as the distance between Runt  
260 and the promoter varied, so could the Runt-RNAP interaction term  $\omega_{rp}$ .

261 We measured the initial rate of transcription along the embryo for all our constructs containing  
262 one Runt binding site in the presence of Runt protein. We then used MCMC sampling to infer the  
263 Runt-dependent parameters  $K_r$  and  $\omega_{rp}$  for each of these constructs while retaining the mean values  
264 of Runt-independent parameters ( $K_b$ ,  $\omega_{bp}$ ,  $p$ , and  $R$ ) obtained from the experiments performed in the

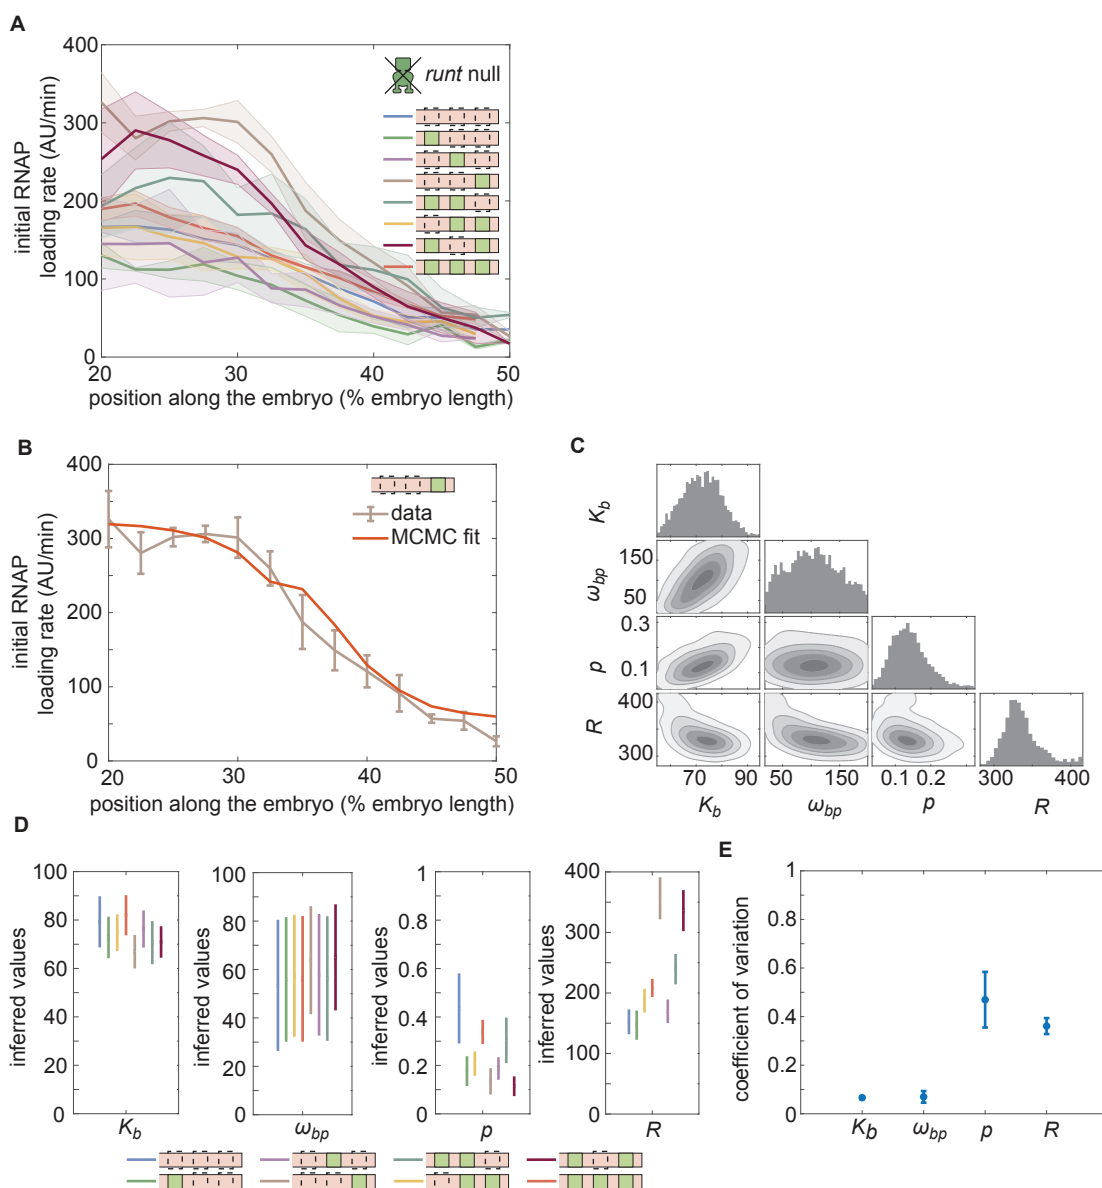

**Figure 4.** Enchaner-to-enchaner variability in the unrepresed transcription level stems from unique RNAP-dependent parameters. **(A)** Measured initial rates of RNAP loading across the anterior-posterior axis of the embryo for all synthetic enhancer constructs in the *absence* of Runt protein. **(B)** Representative best MCMC fit and **(C)** associated corner plot for the [001] construct in the *runt* null background. **(D)** Inferred model parameters for all synthetic enhancers in the absence of Runt repressor. **(E)** Coefficient of variation of inferred parameters. (B, C, error bars represent standard error of the mean over >3 embryos; E, error bars represent standard deviations calculated from the MCMC posterior chains; F, error bars are calculated by propagating the standard deviation of individual parameters from their MCMC chains.)

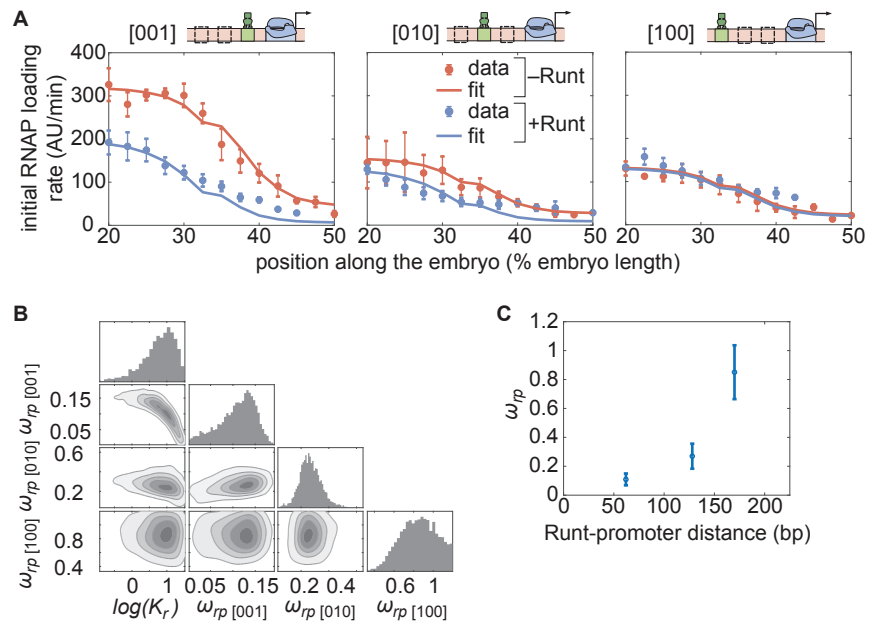

**Figure 5.** Testing the direct repression model in the presence of one Runt binding site. **(A)** Initial transcription rate as a function of position along the embryo for the three constructs containing one Runt binding site in the presence and absence of Runt repressor, together with their best MCMC fits. **(B)** Corner plots from MCMC inference for all constructs with one Runt binding site. **(C)** Inferred  $\omega_{rp}$  value as a function of distance between the promoter and the Runt binding site. (B, data points represent mean and standard deviation of the posterior chains, respectively.)

265 absence of Runt (Fig. 4). The resulting MCMC fits show significant agreement with the experimental  
 266 data (Fig. 5A), confirming that, within our model, the same dissociation constant  $K_r$  can be used  
 267 for all Runt binding sites regardless of their position within the enhancer. Further, the corner  
 268 plot yielded a unimodal distribution of posterior probability of the inferred parameters (Fig. 5B),  
 269 indicating the existence of a unique set of most-likely model parameters.

270 The observed trend in the Runt-RNAP interaction captured by  $\omega_{rp}$  qualitatively agrees with the “direct  
 271 repression” model. Specifically, because the model assumes that Runt interacts directly with RNAP,  
 272 it predicts that, the farther apart Runt and the promoter are, the lower this interaction should be  
 273 [Gray et al., 1994]. In agreement with this prediction, the mean value of  $\omega_{rp}$  obtained from our fits  
 274 changes from high repression ( $\omega_{rp} \approx 0.1$ ) in the [001] construct to almost no repression ( $\omega_{rp} \approx 1$ ) in  
 275 the [100] construct as the Runt site is moved away from the promoter (Fig. 5C). Thus, the direct  
 276 repression model recapitulates repression by a single Runt molecule using the the same dissociation  
 277 constant regardless of Runt binding site position, and displays the expected dependence of the  
 278 Runt-RNAP interaction term on the distance between these two molecules.

## 279 **2.5 Predicting repression by two-Runt binding sites requires both Runt-Runt and** 280 **Runt-Runt-RNAP higher-order cooperativity**

Could the parameters inferred in the preceding section be used to accurately predict repression in  
 the presence of two Runt binding sites? An extra Runt binding site enables new protein-protein  
 interactions between Runt molecules and RNAP (Fig. 6A). First, we considered individual Runt-RNAP  
 interaction terms,  $\omega_{rp1}$  and  $\omega_{rp2}$ , whose values were already inferred from the one-Runt binding site

constructs as  $\omega_{rp_{1001}}$ ,  $\omega_{rp_{1010}}$ , and  $\omega_{rp_{1100}}$  (Fig. 5D). Second, we considered protein-protein interactions (positive or negative) between two Runt molecules,  $\omega_{rr}$ . Third, following recent studies of Bicoid activation of the *hunchback* P2 minimal enhancer [Estrada et al., 2016a, Park et al., 2019], we also posited the existence of simultaneous Runt-Runt-RNAP higher-order cooperativity  $\omega_{rrp}$ . Given these different cooperativities, and as shown in detail in Figure S15B, the predicted rate of transcription is

$$\begin{aligned} \text{Rate} = & R \left( p + b^6 p \omega_{bp} + r p (\omega_{rp1} + \omega_{rp2}) + r^2 p \omega_{rp1} \omega_{rp2} \omega_{rr} \omega_{rrp} + b^6 r p \omega_{bp} (\omega_{rp1} + \omega_{rp2}) + \right. \\ & b^6 r^2 p \omega_{bp} \omega_{rp1} \omega_{rp2} \omega_{rr} \omega_{rrp} \left. \right) \left( 1 + b^6 (1 + 2r + p \omega_{bp}) + 2r + p + r p (\omega_{rp1} + \omega_{rp2}) + r^2 (\omega_{rr} \right. \\ & \left. + p \omega_{rp1} \omega_{rp2} \omega_{rr} \omega_{rrp}) + b^6 r p \omega_{bp} (\omega_{rp1} + \omega_{rp2}) + b^6 r^2 \omega_{rr} + b^6 r^2 p \omega_{bp} \omega_{rp1} \omega_{rp2} \omega_{rr} \omega_{rrp} \right)^{-1}. \end{aligned} \quad (5)$$

281 Despite the complexity of this equation, note that its only free parameters are the cooperativity  
282 parameters  $\omega_{rr}$  and  $\omega_{rrp}$ . As a result, we sought to determine whether the Runt-RNAP cooperativity  
283 terms,  $\omega_{rp1}$  and  $\omega_{rp2}$ , are sufficient to predict repression by two Runt molecules, or whether the  
284 cooperativities given by  $\omega_{rr}$  and  $\omega_{rrp}$  also need to be invoked.

285 Consider the simplest case where two Runt molecules bind and interact with RNAP independently  
286 from each other. Here,  $\omega_{rr} = 1$ , and  $\omega_{rrp} = 1$ . This model has no free parameters; all parameters  
287 have already been determined by the inferences performed on Runt null datasets and one-Runt  
288 binding site constructs (Fig. 4 and Fig. 5, respectively). While there was some agreement between  
289 the model and the data for the [101] construct (Fig. 6B, center), significant deviations from the  
290 prediction occurred for the other two constructs. These deviations ranged from less repression  
291 than predicted for [011] (Fig. 6B, left) to more repression than predicted for [110] (Fig. 6B, right).  
292 Thus, this simple model of Runt independent repression is not supported by the experimental data,  
293 suggesting additional regulatory interactions between the Runt molecules and RNAP.

294 A first alternative to the independent repression model is the consideration of Runt-Runt cooperative  
295 interactions such as those that characterize many transcription factors [Park et al., 2019, Estrada  
296 et al., 2016b, He et al., 2010, Segal et al., 2008, Ptashne, 2004]. However, adding a Runt-Runt  
297 cooperativity term,  $\omega_{rr}$ , was insufficient to account for the observed regulatory behavior (Fig. 6C;  
298 Fig. S13 more thoroughly analyzes this discrepancy). A second alternative consists in incorporating a  
299 Runt-Runt-RNAP higher-order cooperativity term,  $\omega_{rrp}$ . While the best MCMC fits revealed significant  
300 improvements in predictive power, important deviations still existed for the [110] construct (Fig. 6D,  
301 right; Fig. S14 more thoroughly analyzes the MCMC inference results).

302 Not surprisingly, given the agreement of the higher-order cooperativity model with the data for the  
303 [011] and [101] constructs (Fig. 6D, left and center), this agreement persisted when both Runt-Runt  
304 cooperativity and Runt-Runt-RNAP higher-order cooperativity were considered (Fig. 6E, left and  
305 center). However, including these two cooperativities also significantly improved the ability of model  
306 at explaining the [110] experimental data (Fig. 6E, right). Thus, while higher-order cooperativity is the  
307 main interaction necessary to quantitatively describe repression by two Runt repressors, pairwise  
308 cooperativity also needs to be invoked. This conclusion is supported by our MCMC sampling:  
309 posterior distributions for the Runt-Runt cooperativity term are not well constrained for the [011]  
310 or [101] constructs, whereas Runt-Runt-RNAP higher-order cooperativity is constrained very well  
311 across all constructs (Fig. S15D; Fig. S15 more thoroughly analyzes the MCMC inference results). As  
312 a result, accounting for both pairwise and higher order cooperativity is necessary for the model to  
313 explain the observed rate of RNAP loading of all three constructs.

314 The higher-order cooperativity revealed by our analysis can lead to more or less repression than  
315 predicted by the independent repression model, motivating us to determine the magnitude of this  
316 cooperativity across constructs. To make this possible, we inferred the magnitude of the Runt-Runt  
317 cooperativity  $\omega_{rr}$  and the Runt-Runt-RNAP higher-order cooperativity  $\omega_{rrp}$ . As shown in Figure 6F,

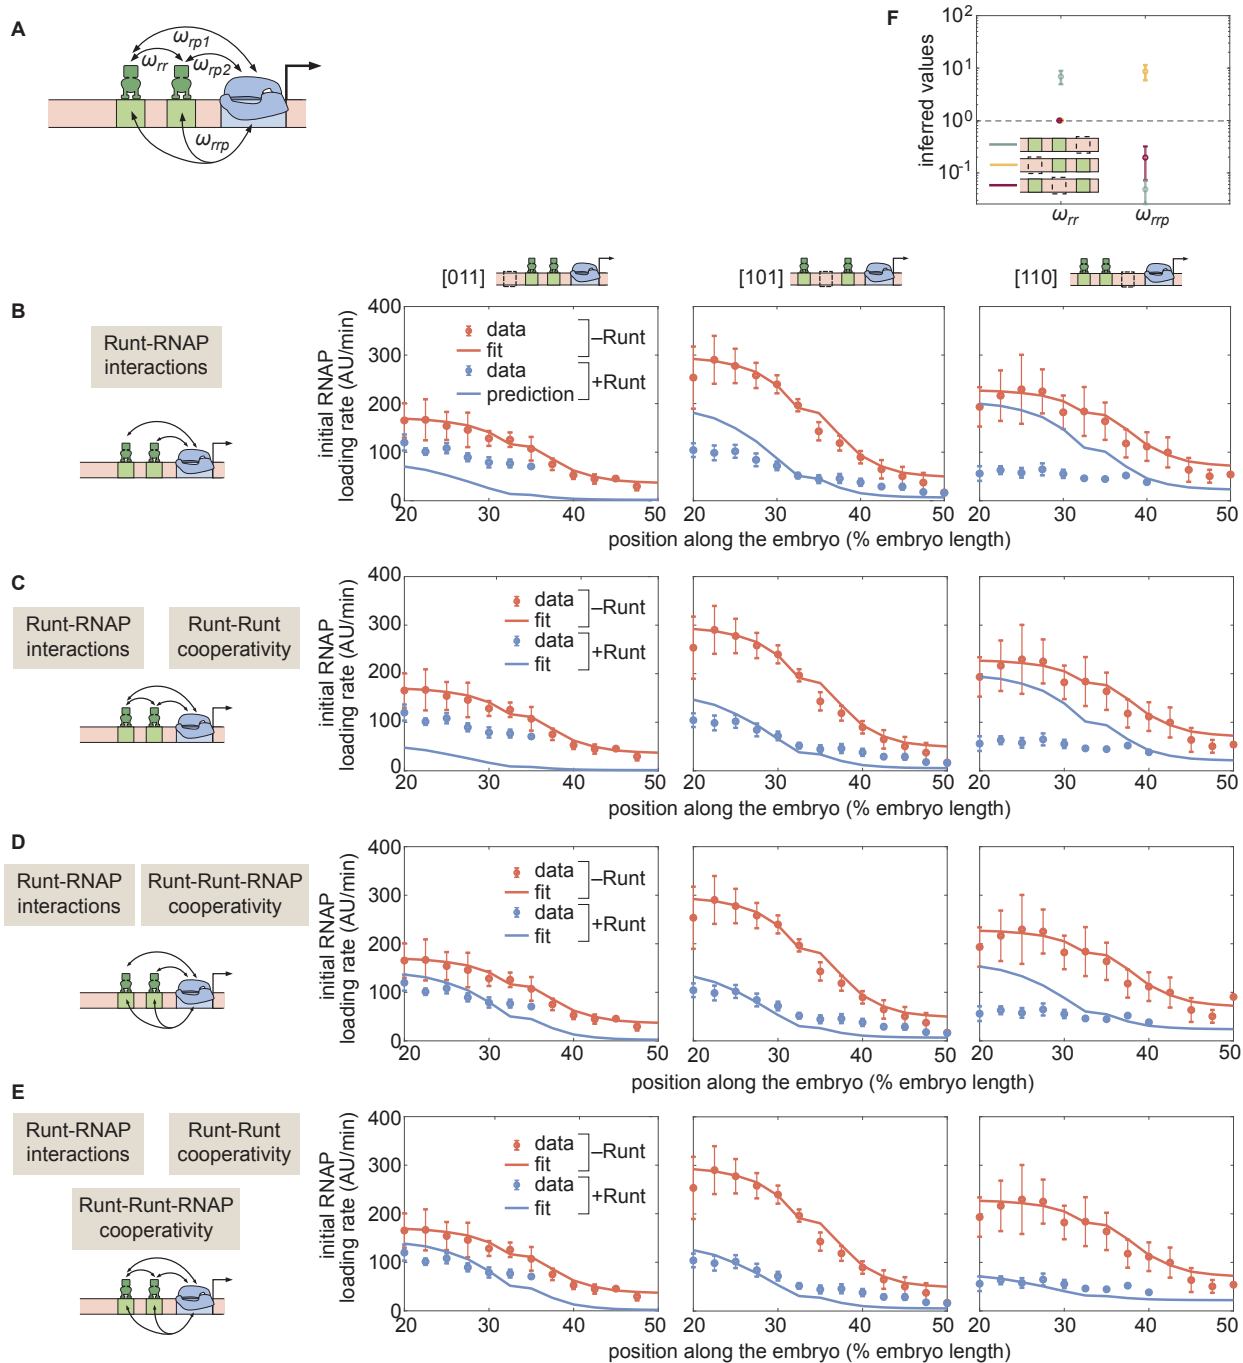

**Figure 6.** Prediction for the transcription initiation rate of *hunchback* P2 with two-Runt binding sites under different models of cooperativity. See caption in the next page.

**Figure 6.** Prediction for the transcription initiation rate of *hunchback* P2 with two-Runt binding sites under different models of cooperativity. **(A)** Direct repression model for *hunchback* P2 with two-Runt binding sites featuring Runt-RNAP interaction terms given by  $\omega_{rp1}$  and  $\omega_{rp2}$ , Runt-Runt cooperativity captured by  $\omega_{rr}$ , and Runt-Runt-RNAP higher-order cooperativity accounted for by  $\omega_{rrp}$ . **(B)** Parameter-free model prediction for two-Runt binding sites when the two Runt molecules bind the DNA and interact with RNAP independently of each other. **(C,D,E)** Best MCMC fits for the data for two-Runt binding site constructs for models with various combinations of cooperativity parameters. **(C)** Model incorporating Runt-Runt cooperativity. **(D)** Model incorporating Runt-Runt-RNAP higher-order cooperativity. **(E)** Model accounting for both Runt-Runt cooperativity and Runt-Runt-RNAP higher-order cooperativity. **(F)** Fixed or inferred parameters  $\omega_{rr}$  and  $\omega_{rrp}$  for all two-Runt binding site constructs. Note that  $\omega_{rr}$  is fixed to 1 for [011] and [101] constructs due to the fact that no Runt-Runt cooperativity is necessary to quantitatively describe the expression driven by these constructs; only the [110] construct is used to infer both  $\omega_{rr}$  and  $\omega_{rrp}$ . The horizontal line of  $\omega = 1$  denotes the case of no cooperativity other than Runt-RNAP cooperativity,  $\omega_{rp}$ . (B-E, data points represent mean and standard error of the mean over > 3 embryos; F, data and error bars represent the mean and standard deviation of the posterior chain, while the standard deviation for the fixed  $\omega_{rr}$  is set to 0.)

318 depending on the spatial arrangement of Runt binding sites, the Runt-Runt-RNAP higher-order  
319 cooperativity term  $\omega_{rrp}$  can be below or above 1. Note that, in doing these fits, we first set the  
320 Runt-Runt cooperativity,  $\omega_{rr}$ , values for [011] and [101] to 1 because, as we had demonstrated  
321 in Figure 6D, only the higher-order Runt-Runt-RNAP cooperativity was necessary. Thus, different  
322 placements of Runt molecules on the enhancer lead to distinct higher-order interactions with  
323 RNAP which, in turn, can result in less or more repression than predicted by a model where Runt  
324 molecules act independently of each other.

## 325 **2.6 Repression by three-Runt binding sites also requires higher-order cooperativity**

326 Building on our success in deploying thermodynamic models to explain repression by one- and  
327 two-Runt binding sites, we investigated repression by three-Runt binding sites. First, we accounted  
328 for pairwise interactions between Runt and RNAP, which were inferred from measurements of  
329 the one-Runt binding site constructs (Fig. 1B), yielding  $\omega_{rp[001]}$ ,  $\omega_{rp[010]}$ , and  $\omega_{rp[100]}$  from [001], [010],  
330 and [100]. Second, we considered pairwise protein-protein interactions between Runt molecules  
331 (Fig. 1C), which were inferred from the two-Runt binding sites constructs through the parameters  
332  $\omega_{rr[011]}$ ,  $\omega_{rr[101]}$ , and  $\omega_{rr[110]}$ . Finally, we incorporated Runt-Runt-RNAP higher-order cooperativity  
333 acquired from the two-Runt binding sites constructs (Fig. 1C) captured by  $\omega_{rrp[011]}$ ,  $\omega_{rrp[101]}$ , and  
334  $\omega_{rrp[110]}$ . We tested our model predictions using a similar scheme to that described in the previous  
335 section: we generated a parameter-free prediction for the initial rate of transcription by using the  
336 inferred parameters from the one- and two-Runt binding sites constructs, including the pairwise  
337 and higher-order interactions described above.

338 Figure 7A shows the resulting parameter-free prediction. As seen in the figure, our model could  
339 not qualitatively recapitulate the experimental data as it predicted too much repression. Such  
340 disagreement suggests that additional regulatory interactions are at play. Building on the need for  
341 higher-order cooperativity in the two-Runt binding site case, we propose the existence of higher  
342 order cooperativities necessary to describe regulation by three Runt molecules—Runt-Runt-Runt  
343 higher-order cooperativity,  $\omega_{rrr}$  and Runt-Runt-Runt-RNAP higher-order cooperativity,  $\omega_{rrrp}$  (Fig. 1D).  
344 The resulting expression for the predicted rate of transcription in the presence of all these sources  
345 of cooperativity is shown in Equation S10 in Section S2. Importantly, we did not try to find the  
346 optimal value for these higher-order cooperativities through fitting. Instead, our objective was to  
347 determine whether the addition of any of these new parameters was sufficient to explain our data.  
348 When including only a Runt-Runt-Runt-RNAP higher-order cooperativity parameter of  $\omega_{rrrp} = 2300$ ,  
349 our model recapitulated the experimental data (Fig. 7B). Thus, our results further support the view

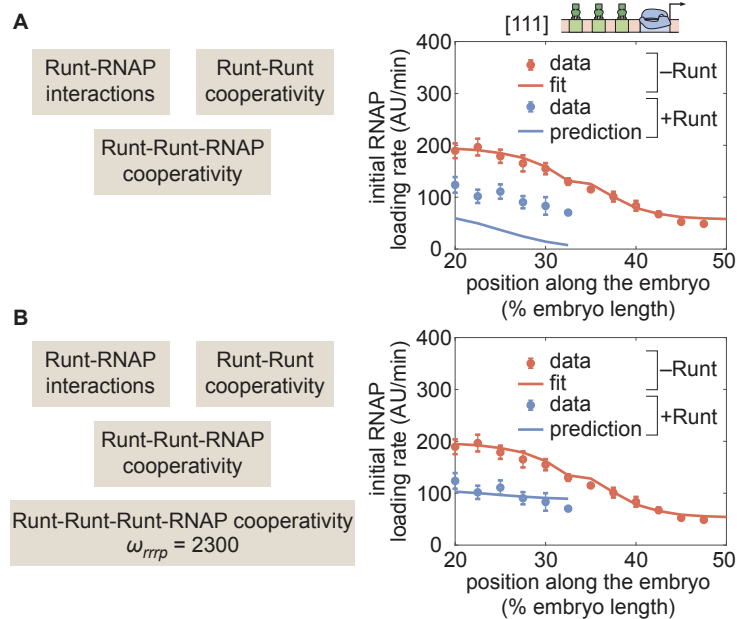

**Figure 7.** Prediction for *hunchback* P2 with three-Runt binding sites and multiple sources of cooperativity. **(A)** Prediction using previously inferred Runt-RNAP, Runt-Runt, and Runt-Runt-RNAP cooperativity parameters. **(B)** Prediction as in (A), but incorporating an additional Runt-Runt-Runt-RNAP higher-order cooperativity parameter of  $\omega_{rrrp} = 2300$ , corresponding to roughly  $8 k_B T$  of free energy. (Data points represent mean and standard error of the mean over >3 embryos.)

350 in which the addition of Runt repressor binding motifs in an enhancer cannot be explained by a  
 351 simple additive interaction between each bound repressor. Rather, their combinatorial effect must  
 352 be taken into account.

### 353 3 Discussion

354 One of the challenges in generating predictions to probe thermodynamic models is that, often,  
 355 these models are contrasted against experimental data from endogenous regulatory regions [Segal  
 356 et al., 2008, Sayal et al., 2016, Park et al., 2019]. Here, the presence of multiple binding sites for  
 357 several transcription factors—known and unknown [Vincent et al., 2016]—leads to models with  
 358 a combinatorial explosion of free parameters. Like the proverbial elephant that can be fit with  
 359 four parameters [Mayer et al., 2010], experiments with endogenous enhancers typically contain  
 360 enough parameters to render it possible to explain away apparent disagreement between theory  
 361 and experiment [Garcia et al., 2020].

362 To close this gap, synthetic minimal enhancers have emerged as an attractive alternative to endoge-  
 363 nous enhancers [Fakhouri et al., 2010, Sayal et al., 2016, Park et al., 2019, Crocker et al., 2016].  
 364 Here, the presence of only a handful of transcription factor binding sites and the ability to systemat-  
 365 ically control their placement and affinity dramatically reduce the number of free parameters in the  
 366 model [Garcia et al., 2020]. Inferences performed on these synthetic constructs could then inform  
 367 model parameters that would make it possible to quantitatively predict transcriptional output of *de*  
 368 *novo* enhancers [Sayal et al., 2016].

369 Building on these works, in the present investigation we sought to predict how the Runt repressor,  
 370 which counteracts activation by Bicoid along the anterior-posterior axis of the early fly embryo

371 [Chen et al., 2012], dictates the output level of transcription. To dissect repression, a strong and  
372 detectable level of expression in the absence of the repressor was needed, prompting us to choose  
373 a simple system of synthetic enhancers based on the strong *hunchback* P2 minimal enhancer  
374 [Garcia et al., 2013, Chen et al., 2012]. This enhancer has been carefully dissected in terms of its  
375 activator Bicoid and the pioneer-like transcription factor Zelda in the early embryo [Driever and  
376 Nusslein-Volhard, 1988, Garcia et al., 2013, Park et al., 2019, Eck et al., 2020], making it easier to  
377 identify neutral sequences within the enhancer for introducing Runt binding sites [Chen et al.,  
378 2012]. Further, when inserted into *hunchback* P2, Runt binding site number determines the level of  
379 transcription incrementally [Chen et al., 2012]. Thus, *hunchback* P2 provided an ideal scaffold onto  
380 which to quantitatively and systematically dissect repression by Runt.

381 Previous studies using synthetic enhancers relied on measurements of input transcription factor  
382 patterns using fluorescence immunostaining, and of cytoplasmic mRNA patterns using fluores-  
383 cence in situ hybridization (FISH) or single-molecule FISH. These fixed-tissue techniques have key  
384 differences from the live-imaging approach adopted here. First, given the dynamical nature of  
385 development, it is necessary to know when data were acquired. Doing so with high temporal  
386 resolution using FISH is challenging, although it can be accomplished to some degree by synchro-  
387 nizing embryo deposition before fixation [Park et al., 2019]. Second, while most transcription  
388 factors directly dictate the rate of RNAP loading, and hence the rate of mRNA production [Spitz  
389 and Furlong, 2012, Garcia et al., 2013, Eck et al., 2020], typical FISH measurements report on the  
390 accumulated mRNA in the cytoplasm, which is a convolution of all processes of the transcription  
391 cycle—initiation, elongation, and termination [Liu et al., 2021, Alberts, 2015]—as well as mRNA  
392 nuclear export dynamics, diffusion, and degradation. These processes could be modulated in space  
393 and time, potentially confounding measurements. Here, we overcame these challenges by using  
394 the MS2 technique to precisely time our embryos and acquire the rate of transcription initiation.

395 Interestingly, our initial dissection of constructs containing various combinations of Runt binding  
396 sites, but in the absence of Runt protein, revealed that unrepressed gene expression levels de-  
397 pend strongly on the number and placement of the binding sites within the enhancer (Fig. 4A).  
398 These results challenge previous assumptions that unregulated gene expression levels would stay  
399 unchanged as enhancer architecture is modulated [Sayal et al., 2016, Fakhouri et al., 2010, Barr  
400 et al., 2017], but they are in accordance with observations in bacterial systems [Garcia et al., 2012].  
401 As a result, our measurements call for accounting for unregulated levels in future quantitative  
402 dissections of eukaryotic enhancers, or to study relative magnitudes such as the fold-change in  
403 gene expression that has driven the dissection of bacterial transcriptional regulation [Phillips et al.,  
404 2019].

405 Once we accounted for this difference in unrepressed gene expression levels, we determined that  
406 the repression profiles obtained for constructs bearing one-Runt binding site could be described by  
407 a simple thermodynamic model (Fig. 2). Specifically, we showed that the same dissociation constant  
408 described Runt binding regardless of the position of its binding site along the enhancer (Fig. 5A).  
409 Further, the Runt-RNAP interaction terms describing repressor action decreased as the binding site  
410 was placed farther from the promoter (Fig. 5C), qualitatively consistent with a “direct repression”  
411 model in which Runt needs to physically contact RNAP in order to realize its function [Jaynes and  
412 O’Farrell, 1991, Gray et al., 1994, Hewitt et al., 1999].

413 Although our model recapitulated repression by a one-Runt binding site, the inferred parameters  
414 were insufficient to quantitatively predict repression by two-Runt binding sites (Fig. S6B). These  
415 results suggest that multiple repressors do not act independently of each other. Instead, new  
416 parameters describing both Runt-Runt cooperativity and Runt-RNAP higher-order cooperativity  
417 had to be incorporated into our models to quantitatively describe Runt action in these constructs



418 (Fig. S6C-E).

419 While we have long known about protein-protein cooperative interactions [*Ackers et al., 1982*], in  
420 the last few years it has become clear that higher-order cooperativity can also be at play in eukaryotic  
421 systems [*Estrada et al., 2016a, Park et al., 2019, Biddle et al., 2020*] as well as in bacteria [*Dodd*  
422 *et al., 2004*] and archaea [*Peeters et al., 2013*]. The existence of this higher-order cooperativity  
423 suggests that, to predict gene expression from DNA sequence, it might be necessary to build  
424 an understanding of the many simultaneous interactions that precede transcriptional initiation.  
425 Our discovery of higher-order cooperativity in the action of multiple Runt molecules opens up  
426 new avenues to uncover the molecular nature of this phenomenon. For example, following an  
427 approach developed in [*Park et al., 2019*], it could be possible to determine whether and how  
428 these cooperativity parameters are modulated upon perturbation of molecular players such as the  
429 Groucho or CtBP co-repressors, Big-brother, a co-factor facilitating the Runt binding to DNA, and  
430 components of the mediator complex [*Park et al., 2019, Courey and Jia, 2001, Walrad et al., 2011*].  
431 Indeed, [*Park et al., 2019*] recently showed that co-activators and mediator units are involved in  
432 dictating the magnitude of similar higher-order cooperativity terms in activation by Bicoid. Thus,  
433 our thermodynamic models provide a lens through which to dissect the molecular underpinnings  
434 of Runt interactions with itself and with the transcriptional machinery.

435 Notably, the need to invoke cooperative interactions as more Runt binding sites are being added  
436 opposes our goal of predicting complex regulatory architectures from experiments with simpler  
437 architectures without the need to invoke new parameters. However, it will be interesting to  
438 determine whether more parameters need to be invoked as the number of Runt binding sites  
439 increases beyond three, or whether the parameters already inferred are sufficient to endow our  
440 models with parameter-free predictive power.

441 Importantly, while our model adopted a “direct repression” view of the mechanism of Runt action,  
442 other mechanisms of repression such as “quenching” could also describe the data. While all such  
443 models call for higher-order cooperativity to describe the data (Supplementary Section S5), our  
444 data cannot differentiate among those models. Thus, we did not attempt to distinguish different  
445 molecular mechanisms of Runt transcriptional repression.

446 Finally, even though the work presented here has relied exclusively on thermodynamic models,  
447 it is important to note that a much more general approach based on non-equilibrium models  
448 could also be appropriate for describing our data. Indeed, an increasing body of work over the last  
449 few years has provided evidence for the necessity of invoking these more complex models in the  
450 context of transcriptional regulation in eukaryotes [*Estrada et al., 2016a, Li et al., 2018, Park et al.,*  
451 *2019, Eck et al., 2020*]. In future work, it will be interesting to determine whether, when our data is  
452 viewed through the lens of these non-equilibrium models, invoking higher-order cooperativity is  
453 still necessary or whether, instead, simple pairwise protein-protein interactions suffice to reach an  
454 agreement between theory and experiment.

455 Overall, the work presented here establishes a framework for systematically and quantitatively  
456 studying repression in the early fly embryo. As showcased here, synthetic enhancers based on the  
457 *hunchback* P2 minimal enhancer constitute an ideal scaffold for the study of other repressors in  
458 early fly embryos. For example, we envision that this approach could be used to dissect repression  
459 by other transcription factors such as *Capicua* or *Krüppel* [*Löhr et al., 2009, Sauer and Jackle,*  
460 *1991, Papagianni et al., 2018, Chen et al., 2012*], and to probe observations of multiple repressors  
461 working together to oppose activation by Bicoid in establishing gene expression patterns along  
462 the anterior-posterior axis [*Chen et al., 2012, Briscoe and Small, 2015*]. We anticipate that a similar  
463 approach could be used to dissect repression along the dorso-ventral axis of the embryo, by

464 for example, adding repressor binding sites to well-established reporter constructs that are only  
465 regulated by the Dorsal activator [Jiang and Levine, 1993]. Critically, we need to understand not  
466 only how one species of repressor works in concert with an activator, but also how multiple species  
467 of repressors work together as a system. The approach presented here provides a way forward  
468 for predictively understanding the complex gene regulatory network that shapes gene expression  
469 patterns in the early fly embryo.

## 470 4 Materials and Methods

### 471 4.1 Generation of synthetic enhancers with MS2 reporters

472 The synthetic enhancer constructs used in this study are based off of Chen et al. [2012]. In summary,  
473 the *hunchback* P2 enhancer was used as a scaffold to introduce Runt binding sites at different  
474 positions that are thought to be neutral (i.e. these Runt binding sites do not interfere with any  
475 other obvious binding sites for other transcription factors in the early *Drosophila* embryos as shown  
476 in Fig. S9). For the three positions chosen to introduce Runt binding sites in Chen et al. [2012],  
477 the Gene Synthesis service from Genscript was used to generate synthetic enhancers with all  
478 possible configurations of zero-, one-, two-, and three-Runt binding sites in *hunchback* P2 as shown  
479 in Figure 1A. The enhancer sequences were placed into the original plasmid pIB backbone [Chen  
480 et al., 2012] using the Gene Fragment Synthesis service in Genscript, followed by the *even-skipped*  
481 promoter, and 24 repeats of MS2v5 loops [Wu et al., 2015], the *lacZ* coding sequence, and the  $\alpha$ -  
482 Tubulin 3'UTR sequence [Chen et al., 2012]. These plasmids were injected into the 38F1 landing site  
483 using the RMCE method [Bateman et al., 2006] by BestGene Inc. Flies were screened by selecting  
484 for white eye color and made homozygous. The orientation of the insertion was determined by  
485 genomic PCR to ensure a consistent orientation across all of our constructs. Specifically, we used  
486 two sets of primers that each amplified one of these two possible orientations: "Upward", where  
487 the forward primer binds to a genomic location outside of 38F1 (TTCTAGTTCAGTGAAATCCAAGCA)  
488 and the reverse primer binds to a location in our reporter transgene (ACGCCAGGGTTTTCCAG),  
489 and "Downward", where the forward primer remains the same as the "Upward" set and the reverse  
490 primer binds to a location in our reporter transgene (CTCTGTTCTCGCTATTATCCAACC) when the  
491 insertion is the opposite orientation to the "Upward" orientation. As a result, only amplicons from  
492 either one of the orientations of insertion in the 38F1 landing site can be obtained. We chose the  
493 "Downward" orientation for all our constructs.

### 494 4.2 CRISPR-Cas9 knock-in of the green LlamaTag in the endogenous *runt* locus

495 We used CRISPR-Cas9 mediated Homology Directed Repair (HDR) to insert the LlamaTag against  
496 eGFP into the N-terminal of the *runt* endogenous locus [Bothma et al., 2018, Gratz et al., 2015].  
497 The donor plasmid was constructed by stitching individual fragments—PCR amplified left/right  
498 homology arms from the endogenous *runt* locus roughly 1 kb in length each, LlamaTag, and pHD-  
499 scarless vector—using Gibson assembly [Gratz et al., 2015]. The PAM sites in the donor plasmid  
500 were mutated such that the Cas9 only cleaved the endogenous loci, not the donor plasmid, without  
501 changing the amino acid sequence of the Runt protein. The final donor plasmid contained the  
502 3xP3-dsRed marker such that dsRed is expressed in the fly eye and ocelli for screening. Positive  
503 transformant flies were screened using a fluorescence dissection scope and set up for single fly  
504 crosses to establish individual lines that were then verified with PCR amplification and Sanger  
505 sequencing (UC Berkeley Sequencing Facility). Importantly, this *LlamaTag-runt* allele rescues devel-  
506 opment to adulthood as a homozygous. Thus we concluded that the LlamaTag-Runt allele can be  
507 used to monitor the behavior of endogenous Runt protein.

### 508 4.3 Fly strains

509 Transcription from the synthetic enhancer reporter constructs was measured by using embryos  
510 from crossing *yw;his2av-mRFP1;MCP-eGFP(2)* females and *yw;synthetic enhancer-MS2v5-lacZ;+* males  
511 as described in [[Garcia et al., 2013](#), [Eck et al., 2020](#), [Lammers et al., 2020](#)].

512 eGFP-Bicoid measurements were performed using the fly line from [[Gregor et al., 2007](#)]. The  
513 LlamaTag-Runt measurements were done using the fly line *LlamaTag-Runt; +; vasa-eGFP, His2Av-iRFP*  
514 illustrated in Table 2. Briefly, eGFP was supplied by a *vasa* maternal driver. Females carrying both  
515 the LlamaTag-Runt and the *vasa*-driven eGFP were crossed with males carrying the LlamaTag-Runt,  
516 the progeny from this cross were imaged and then recovered to determine the embryo's sex  
517 using PCR. PCR was run with three sets of primers: Y chr1 (Forward: CGATCCAGCCCAATCTCTCATAT-  
518 CACTA, Reverse: ATCGTCGGTAATGTGTCTCCGTAATTT), Y chr2 (Forward: AACGTAACCTAGTCGGATTG-  
519 CAAATGGT, Reverse: GAGGCGTACAATTTCTTTCTCATGTCA), and Auto1 (Forward: GATTTCGATGCA-  
520 CACTCACATTCTTCTCC, Reverse: GCTCAGCGCGAAACTAACATGAAAACT). Two of primer sets (Y chr1  
521 and Y chr2) bind to the Y chromosome while the other one (Auto1) binds to the autosome and  
522 constitutes a positive control [[Lott et al., 2011](#)].

523 To generate the embryos that are zygotic null for the *runt* allele, we used a fly cross scheme consist-  
524 ing of two crosses. In the first generation, we crossed *LlamaTag-Runt;+;+* males with *run3/FM6;+;MCP-*  
525 *eGFP(4F),his2av-mRFP1* females. *run3* is the null allele for *runt*, missing around 5 kb including the  
526 coding sequence of the *runt* locus [[Gergen and Butler, 1988](#), [Chen et al., 2012](#)]. The *MCP-eGFP(4F)*  
527 transgene expresses approximately twice the amount of MCP protein than the *MCP-eGFP(2)* [[Garcia](#)  
528 [et al., 2013](#), [Eck et al., 2020](#)] and thus results in similar levels of MCP to those of *MCP-eGFP(2)* in the  
529 trans-heterozygotes. The female progeny from this cross, *LlamaTag-Runt/run3;+;MCP-eGFP(4F),his2av-*  
530 *mRFP1/+* was then crossed with males whose genotype was *LlamaTag-Runt/Y;synthetic enhancer-*  
531 *MS2v5-lacZ;+* to produce the embryos that we used for live imaging. The resulting embryos carried  
532 maternally supplied MCP-eGFP and His-RFP for visualization of nascent transcripts and nuclei. The  
533 X chromosome contained LlamaTag-Runt allele or *run3* null allele. We could differentiate between  
534 these two genotypes because, when the embryo had the Runt allele, a stripe pattern would appear  
535 in late nc14. We imaged all embryos until late nc14 to make sure that we were capturing the nulls.

### 536 4.4 Sample preparation and data collection

537 Sample preparation was done following the protocols described in [[Garcia et al. \[2013\]](#)]. Briefly,  
538 embryos were collected, dechorionated with bleach for 1-2 minutes, and then mounted between a  
539 semipermeable membrane (Lumox film, Starstedt, Germany) and a coverslip while embedded in  
540 Halocarbon 27 oil (Sigma-Aldrich). Live imaging was performed using a Leica SP8 scanning confocal  
541 microscope, a White Light Laser and HyD detectors (Leica Microsystems, Biberach, Germany).  
542 Imaging settings for the MS2 experiments with the presence of MCP-eGFP and Histone-RFP were  
543 the same as in [[Eck et al. \[2020\]](#)] except that we used 1024x245 (pixels) format to image a wider field  
544 of view along the anterior-posterior axis. The settings for the eGFP-Bicoid measurements were the  
545 same as described in [[Eck et al. \[2020\]](#)].

546 The settings for the eGFP:LlamaTag-Runt measurements were similar to that of eGFP-Bicoid except  
547 for the following. To increase our imaging throughput, we utilized the "Mark and Position" func-  
548 tionality in the LASX software (Leica SP8) to image 5-6 embryos simultaneously. To account for the  
549 decreased time resolution, we lowered the z-stack size from 10  $\mu\text{m}$  to 2.5  $\mu\text{m}$ , keeping the 0.5  $\mu\text{m}$   
550 z-step. By doing this, we could maintain 1 minute frame rate for each imaged embryo. Additionally,  
551 these flies expressed Histone-iRFP, instead of Histone-RFP as in [[Eck et al. \[2020\]](#)], so that we used a

552 670 nm laser at 40  $\mu$ W (measured at a 10x objective) for excitation of the histone channel, and the  
553 HyD detector was set to a 680 nm-800 nm spectral window.

#### 554 **4.5 Image Analysis**

555 Images were analyzed using custom-written software (MATLAB, [mRNA Dynamics Github repository](#))  
556 following the protocol in [Garcia et al. \[2013\]](#) and [Eck et al. \[2020\]](#). Briefly, this procedure involved  
557 segmentation and tracking of nuclei and transcription spots. First, segmentation and tracking of  
558 individual nuclei were done using the histone channel as a nuclear mask. Second, segmentation of  
559 each transcription spot was done based on its fluorescence intensity and existence over multiple  
560 z-stacks. The intensity of each MCP-GFP transcriptional spot was calculated by integrating pixel  
561 intensity values in a small window around the spot and subtracting the background fluorescence  
562 measured outside of the active transcriptional locus. When there was no detectable transcriptional  
563 activity, we assigned NaN values for the intensity. The tracking of transcriptional spots was done by  
564 using the nuclear tracking and proximity of transcriptional spots between consecutive time points.  
565 The nuclear protein fluorescence intensities from the eGFP-Bicoid and LlamaTag-Runt fly lines,  
566 which we use as a proxy for the protein nuclear concentration, were calculated as follows. Using the  
567 nuclear mask generated from the histone channel, we performed the same nuclear segmentation  
568 and tracking as described above for the MS2 spots. Then, for every z-section, we extracted the  
569 integrated fluorescence over a 2 $\mu$ m diameter circle on the xy-plane centered on each nucleus. For  
570 each nucleus, the recorded fluorescence corresponded to the z-position where the fluorescence  
571 was maximal. This resulted in an average nuclear concentration as a function of time for each  
572 single nucleus. These concentrations from individual nuclei were then averaged over a narrow  
573 spatial window (2.5% of the embryo length) to generate the spatially averaged protein concentration  
574 reported in the main text. For the eGFP:LlamaTag-Runt datasets, we had to subtract the background  
575 eGFP fluorescence due to the presence of an unbound eGFP population [[Bothma et al., 2018](#)]. We  
576 used the same protocol described in [Bothma et al. \[2018\]](#) and in the Supplementary Section [S7](#) to  
577 extract this background.

#### 578 **4.6 Bayesian inference procedure: Markov Chain Monte Carlo sampling**

579 Parameter inference was done using the Markov Chain Monte Carlo (MCMC) method. We used  
580 a well-established package *MCMCstat* that uses an adaptive MCMC algorithm [[Haario et al., 2006,](#)  
581 [2001](#)]. A detailed description on how we performed the MCMC parameter inference, for example  
582 setting the priors and bounds for parameters, is illustrated in Supplementary Section [S4](#).

583 **4.7 Biological Materials**

| Plasmids                                                   |                                                                                |
|------------------------------------------------------------|--------------------------------------------------------------------------------|
| Name (hyperlinked to Benchling)                            | Function                                                                       |
| <a href="#">pIB-hbP2-evePr-MS2v5-LacZ-Tub3UTR</a>          | [000]-MS2v5 reporter construct                                                 |
| <a href="#">pIB-hbP2+r1-far-evePr-MS2v5-LacZ-Tub3UTR</a>   | [100]-MS2v5 reporter construct                                                 |
| <a href="#">pIB-hbP2+r1-mid-evePr-MS2v5-LacZ-Tub3UTR</a>   | [010]-MS2v5 reporter construct                                                 |
| <a href="#">pIB-hbP2+r1-close-evePr-MS2v5-LacZ-Tub3UTR</a> | [001]-MS2v5 reporter construct                                                 |
| <a href="#">pIB-hbP2+r2-2+3-evePr-MS2v5-LacZ-Tub3UTR</a>   | [011]-MS2v5 reporter construct                                                 |
| <a href="#">pIB-hbP2+r2-1+3-evePr-MS2v5-LacZ-Tub3UTR</a>   | [101]-MS2v5 reporter construct                                                 |
| <a href="#">pIB-hbP2+r2-1+2-evePr-MS2v5-LacZ-Tub3UTR</a>   | [110]-MS2v5 reporter construct                                                 |
| <a href="#">pIB-hbP2+r3-evePr-MS2v5-LacZ-Tub3UTR</a>       | [111]-MS2v5 reporter construct                                                 |
| <a href="#">pHD-scarless-LlamaTag-Runt</a>                 | Donor plasmid for LlamaTag-Runt CRISPR knock-in fusion for the N-terminal      |
| <a href="#">pU6:3-gRNA(Runt-N-2)</a>                       | gRNA plasmid for LlamaTag-Runt CRISPR knock-in fusion for the N-terminal       |
| <a href="#">pCasper-vasa-eGFP</a>                          | <i>vasa</i> maternal driver for ubiquitous eGFP expression in the early embryo |

**Table 1.** List of plasmids used to create the transgenic fly lines used in this study.

| Fly lines                                                          |                                                                          |
|--------------------------------------------------------------------|--------------------------------------------------------------------------|
| Genotype                                                           | Use                                                                      |
| <i>LlamaTag-Runt</i> ; +; <i>vasa-eGFP</i> , <i>His2Av-iRFP</i>    | Visualize LlamaTagged Runt protein and label nuclei                      |
| <i>LlamaTag-Runt</i> ; +; <i>MCP-eGFP(4F)</i> , <i>His2Av-iRFP</i> | Visualize LlamaTagged Runt protein, nascent transcripts and label nuclei |
| <i>run3/FM6</i> ; +; +                                             | Visualize LlamaTagged Runt protein, nascent transcripts and label nuclei |
| <i>yw</i> ; <i>His2Av-mRFP</i> ; <i>MCP-eGFP</i>                   | Females to label nascent RNA and nuclei                                  |
| <i>yw</i> ; [000]- <i>MS2v5</i> ; +                                | Males carrying the MS2 reporter transgene                                |
| <i>yw</i> ; [100]- <i>MS2v5</i> ; +                                | Males carrying the MS2 reporter transgene                                |
| <i>yw</i> ; [010]- <i>MS2v5</i> ; +                                | Males carrying the MS2 reporter transgene                                |
| <i>yw</i> ; [001]- <i>MS2v5</i> ; +                                | Males carrying the MS2 reporter transgene                                |
| <i>yw</i> ; [011]- <i>MS2v5</i> ; +                                | Males carrying the MS2 reporter transgene                                |
| <i>yw</i> ; [101]- <i>MS2v5</i> ; +                                | Males carrying the MS2 reporter transgene                                |
| <i>yw</i> ; [110]- <i>MS2v5</i> ; +                                | Males carrying the MS2 reporter transgene                                |
| <i>yw</i> ; [111]- <i>MS2v5</i> ; +                                | Males carrying the MS2 reporter transgene                                |

**Table 2.** List of fly lines used in this study and their experimental usage

## 584 5 Acknowledgements

585 We are grateful to Armando Reimer, Brandon Schlomann, Elizabeth Eck, Gabriella Martini, Jacques  
 586 Bothma, Jeehae Park, Jia Ling, Matthew Norstad, Michael Eisen, Nicholas Lammers, Nipam Patel, Rob  
 587 Phillips, Simon Alamos, Xavier Darzacq, and Yasemin Kirişçioglu for their guidance and comments  
 588 on our manuscript. This work was supported by the Burroughs Wellcome Fund Career Award at  
 589 the Scientific Interface, the Sloan Research Foundation, the Human Frontiers Science Program, the  
 590 Searle Scholars Program, the Shurl and Kay Curci Foundation, the Hellman Foundation, the NIH  
 591 Director's New Innovator Award (DP2 OD024541-01), and NSF CAREER Award (1652236) to HGG,  
 592 and a KFAS scholarship to YJK.

## 593 S1 Derivation of the general thermodynamic model for the *hunchback* P2 594 enhancer

595 In this section, we rederive the thermodynamic model presented in the main text, now without  
 596 the assumption of strong Bicoid-Bicoid cooperativity. The equilibrium thermodynamic modeling  
 597 framework that we used in this paper is described in more detail in [Bintu et al. \[2005b,a\]](#).

598 We start by modeling the case of *hunchback* P2 without any Runt binding sites, which is believed  
 599 to have at least six Bicoid binding sites [[Park et al., 2019](#), [Driever et al., 1989](#)]. As shown by  
 600 the states and weights presented in Figure S1A, in our thermodynamic model, we assume that  
 601 the six Bicoid binding sites have the same dissociation constant given by  $K_b$ , and we posit that  
 602 RNAP-promoter binding is governed by a dissociation constant given by  $K_p$ . We also assume  
 603 pairwise cooperativity between Bicoid molecules given by  $\omega_b$ , and cooperativity between each  
 604 Bicoid molecule and RNAP given by  $\omega_{bp}$ . For simplicity, we will use the dimensionless parameters  
 605  $b = [Bicoid]/K_b$  and  $p = [RNAP]/K_p$ , where  $[Bicoid]$ , and  $[RNAP]$  are the concentrations of Bicoid  
 606 and RNAP, respectively, and  $K_b$  and  $K_p$  are their corresponding dissociation constants.

607 We factor the total partition function into two categories:  $Z_b$  corresponding to states that only have  
 608 Bicoid bound, and  $Z_{bp}$  describing states with both Bicoid and RNAP bound. Then then calculate  
 609 each component separately. The sum of microstates for  $Z_b$  is

$$Z_b = 1 + 6b + 15b^2\omega_b + \dots + b^6\omega_b^5 = 1 + \sum_{i=1}^6 \binom{6}{i} b^i \omega_b^{i-1}. \quad (S1)$$

610 Using the binomial theorem, we can simplify Equation S1 leading to

$$Z_b = 1 + \sum_{i=1}^6 \binom{6}{i} b^i \omega_b^{i-1} = 1 + \frac{1}{\omega_b} [(1 + b \omega_b)^6 - 1]. \quad (S2)$$

611 Using the same logic, we obtain  $Z_{bp}$  such that

$$Z_{bp} = \left( p + p \sum_{i=1}^6 \binom{6}{i} b^i \omega_b^{i-1} \omega_{bp}^i \right) = p + \frac{p}{\omega_b} [(1 + b \omega_b \omega_{bp})^6 - 1]. \quad (S3)$$

612 Using these two partition functions, we then calculate the probability of the promoter being bound  
 613 by RNAP,  $p_{bound}$  as

$$P_{bound} = \frac{Z_{bp}}{Z_b + Z_{bp}} = \frac{p + \frac{p}{\omega_b} [(1 + b \omega_b \omega_{bp})^6 - 1]}{1 + \frac{1}{\omega_b} [(1 + b \omega_b)^6 - 1] + p + \frac{p}{\omega_b} [(1 + b \omega_b \omega_{bp})^6 - 1]}. \quad (S4)$$

614 Following recent work [[Gregor et al., 2007](#), [Park et al., 2019](#)], we now assume that the Bicoid-Bicoid  
615 pairwise cooperativity is very strong ( $\omega_b \gg 1$ ). We can then simplify Equation S4 to obtain

$$P_{bound} = \frac{p + p b^6 \omega_b^5 \omega_{bp}^6}{1 + p + b^6 \omega_b^5 + p b^6 \omega_b^5 \omega_{bp}^6}. \quad (S5)$$

616 If we now define a new binding constant for Bicoid,  $K'_b = K_b * (\frac{1}{\omega_b})^5$ , such that  $b' = b \omega_b^5$ , and a new  
617 cooperativity term between Bicoid and RNAP given by  $\omega'_{bp} = \omega_{bp}^6$ , we can then rewrite Equation S5 as

$$P_{bound} = \frac{p + b'^6 p \omega'_{bp}}{1 + p + b'^6 + b'^6 p \omega'_{bp}}, \quad (S6)$$

618 which is the expression we use throughout the main text. Thus, strong pairwise cooperativity  
619 between Bicoid molecules leads to a functional form where only the state with all Bicoid molecules  
620 bound remain (six in this case). This strong cooperativity can explain the sharp step-like expression  
621 pattern along the embryo's anterior-posterior axis of the *hunchback* gene (Fig. 3); [[Gregor et al.](#)  
622 [[2007](#)], [[Park et al. 2019](#)], [[Driever and Nusslein-Volhard 1988, 1989](#)]].

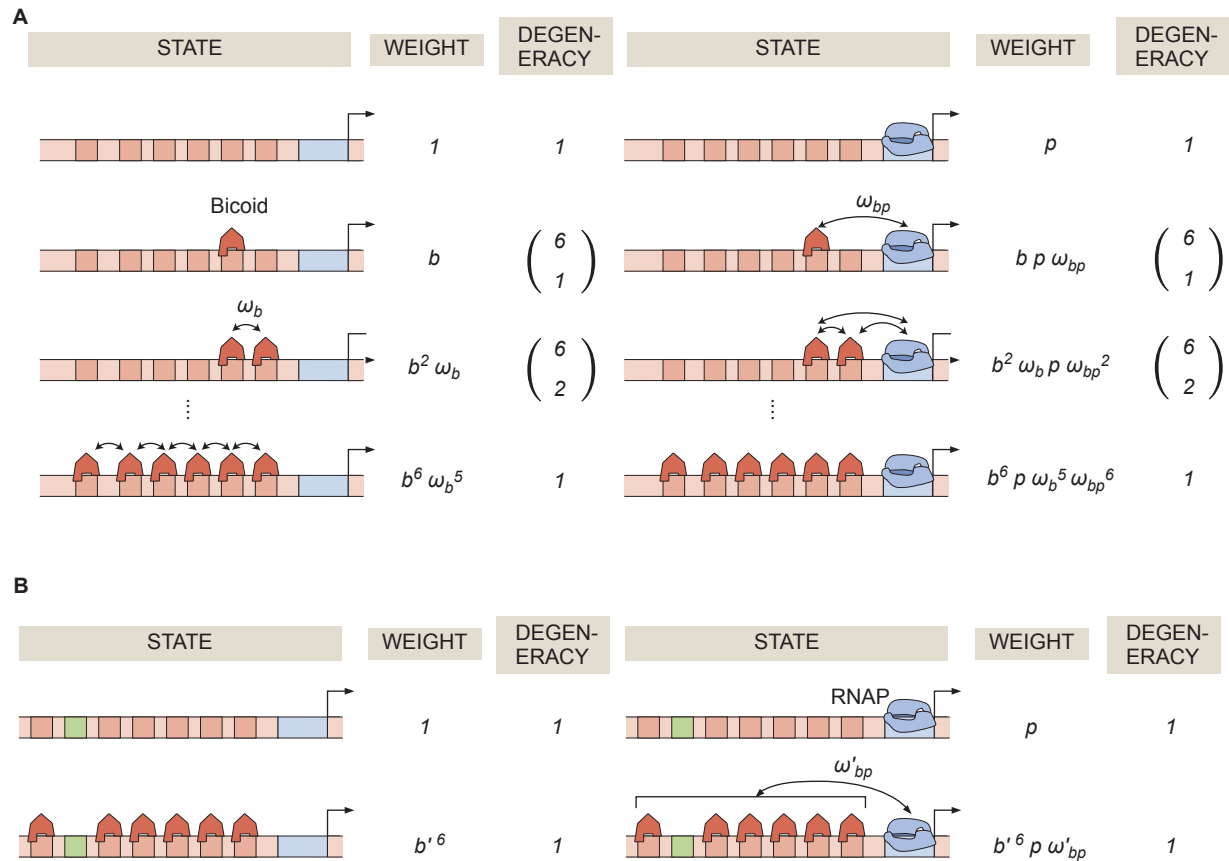

**Figure S1.** General thermodynamic model for a *hunchback* P2 enhancer with six Bicoid binding sites. **(A)** States, weights, and degeneracy considered for our thermodynamic model. **(B)** Simpler form of the thermodynamic model in the limit of  $\omega_b \gg 1$ .



623 **S2 Derivation of the general and simpler thermodynamic model for the**  
 624 ***hunchback* P2 enhancer with one Runt binding site**

625 Having derived the equation for the strong cooperative binding of Bicoid to the wild-type *hunchback*  
 626 P2 enhancer, we will now extend that model to the case of *hunchback* P2 with one Runt binding site.  
 627 The corresponding states and weights of our full model are shown in Figure S2A.

628 Using a similar logic for calculating the partition functions as described in the previous section, we  
 629 can compute the probability of the promoter being bound by RNAP as

$$p_{bound} = \frac{\overbrace{\left( p + p \sum_{i=1}^6 \binom{6}{i} b^i \omega_b^{i-1} \omega_{bp}^i \right)}^{\text{Bicoid and RNAP}} + \overbrace{\left( r p \omega_{rp} + r p \omega_{rp} \sum_{i=1}^6 \binom{6}{i} b^i \omega_b^{i-1} \omega_{bp}^i \right)}^{\text{Bicoid, Runt, and RNAP}}}{\underbrace{\left( 1 + \sum_{i=1}^6 \binom{6}{i} b^i \omega_b^{i-1} \right)}_{\text{Bicoid only}} + \underbrace{\left( p + p \sum_{i=1}^6 \binom{6}{i} b^i \omega_b^{i-1} \omega_{bp}^i \right)}_{\text{Bicoid and RNAP}} + \underbrace{\left( r + r \sum_{i=1}^6 \binom{6}{i} b^i \omega_b^{i-1} \right)}_{\text{Bicoid and Runt}} + \underbrace{\left( r p \omega_{rp} + r p \omega_{rp} \sum_{i=1}^6 \binom{6}{i} b^i \omega_b^{i-1} \omega_{bp}^i \right)}_{\text{Bicoid, Runt, and RNAP}}}, \quad (S7)$$

630 where, in addition to the parameters defined in the above section for the wild-type *hunchback*  
 631 P2 case in the absence of Runt, we have added two parameters: the dissociation constant for  
 632 Runt given by  $K_r$ , and a Runt-RNAP interaction term (an anti-cooperativity),  $\omega_{rp}$ . Using the binomial  
 633 theorem as in Equation S2, we can simplify Equation S7 to obtain

$$p_{bound} = \frac{p + \frac{p}{\omega_b} [(1 + b\omega_b \omega_{bp})^6 - 1] + r p \omega_{rp} + \frac{r p \omega_{rp}}{\omega_b} [(1 + b\omega_b \omega_{bp})^6 - 1]}{1 + \frac{1}{\omega_b} [(1 + b\omega_b)^6 - 1] + p + \frac{p}{\omega_b} [(1 + b\omega_b \omega_{bp})^6 - 1] + r + \frac{r}{\omega_b} [(1 + b\omega_b)^6 - 1] + r p \omega_{rp} + \frac{r p \omega_{rp}}{\omega_b} [(1 + b\omega_b \omega_{bp})^6 - 1]}. \quad (S8)$$

634 We now again assume that Bicoid-Bicoid cooperativity is very strong such that  $\omega_b \gg 1$ . Then, we can  
 635 combine Equation S8 with Equation 1 to obtain

$$Rate = R p_{bound} = R \frac{p + b'^6 p \omega_{bp} + r p \omega_{rp} + b'^6 r p \omega'_{bp} \omega_{rp}}{1 + b'^6 + r + b'^6 r + p + b'^6 p \omega'_{bp} + r p \omega_{rp} + b'^6 r p \omega'_{bp} \omega_{rp}}, \quad (S9)$$

where the new parameters,  $b'$  and  $\omega'_{bp}$  are defined in the same way as in Equation S6. The effective  
 states and weights remaining after taking this limit are shown in Figure S2B. Similarly, we can  
 derive expressions for  $p_{bound}$  in the presence of two and three Runt binding sites, and in the strong  
 Bicoid-Bicoid cooperativity limit in order to obtain the predictions used throughout this text. We  
 show this expression for two Runt binding sites in Equation 5. Further, for the case of repression by  
 three Runt binding sites, the rate of transcription is given by

$$\begin{aligned} Rate = & R (p + b^6 p \omega_{bp} + r p (\omega_{rp1} + \omega_{rp2} + \omega_{rp3}) + b^6 r p \omega_{bp} (\omega_{rp1} + \omega_{rp2} + \omega_{rp3}) + \\ & r^2 p (\omega_{rp1} \omega_{rp2} \omega_{rr1} \omega_{rrp1} + \omega_{rp2} \omega_{rp3} \omega_{rr2} \omega_{rrp2} + \omega_{rp3} \omega_{rp1} \omega_{rr3} \omega_{rrp3}) + \\ & r^3 p \omega_{rp1} \omega_{rp2} \omega_{rp3} \omega_{rr1} \omega_{rr2} \omega_{rr3} \omega_{rrp1} \omega_{rrp2} \omega_{rrp3} \omega_{rrr} \omega_{rrrp} + \\ & b^6 r^2 p \omega_{bp} (\omega_{rp1} \omega_{rp2} \omega_{rr1} \omega_{rrp1} + \omega_{rp2} \omega_{rp3} \omega_{rr2} \omega_{rrp2} + \omega_{rp3} \omega_{rp1} \omega_{rr3} \omega_{rrp3}) + \\ & b^6 r^3 p \omega_{bp} \omega_{rp1} \omega_{rp2} \omega_{rp3} \omega_{rr1} \omega_{rr2} \omega_{rr3} \omega_{rrp1} \omega_{rrp2} \omega_{rrp3} \omega_{rrr} \omega_{rrrp}) \\ & (1 + b^6 (1 + 3r + p \omega_{bp}) + 3r + p + r p (\omega_{rp1} + \omega_{rp2} + \omega_{rp3}) + \\ & r^2 p (\omega_{rp1} \omega_{rp2} \omega_{rr1} \omega_{rrp1} + \omega_{rp2} \omega_{rp3} \omega_{rr2} \omega_{rrp2} \omega_{rp1} \omega_{rr3} \omega_{rrp3}) + b^6 r^2 (\omega_{rr1} + \omega_{rr2} + \omega_{rr3}) + \\ & b^6 r^3 \omega_{rr1} \omega_{rr2} \omega_{rr3} \omega_{rrr} + r^2 (\omega_{rr1} + \omega_{rr2} + \omega_{rr3}) + r^3 \omega_{rr1} \omega_{rr2} \omega_{rr3} + \\ & r^3 p \omega_{rp1} \omega_{rp2} \omega_{rp3} \omega_{rr1} \omega_{rr2} \omega_{rr3} \omega_{rrp1} \omega_{rrp2} \omega_{rrp3} \omega_{rrr} \omega_{rrrp} + \\ & b^6 r p \omega_{bp} (\omega_{rp1} + \omega_{rp2} + \omega_{rp3}) + b^6 r^2 p \omega_{bp} (\omega_{rp1} \omega_{rp2} \omega_{rr1} \omega_{rrp1} + \omega_{rp2} \omega_{rp3} \omega_{rr2} \omega_{rrp2} + \omega_{rp3} \omega_{rp1} \omega_{rr3} \omega_{rrp3}) + \\ & b^6 r^3 p \omega_{bp} \omega_{rp1} \omega_{rp2} \omega_{rp3} \omega_{rr1} \omega_{rr2} \omega_{rr3} \omega_{rrp1} \omega_{rrp2} \omega_{rrp3} \omega_{rrr} \omega_{rrrp})^{-1}, \end{aligned} \quad (S10)$$

636 where the parameters are defined as in Figure 1 and Section 2.6.

### 637 **S3 Comparing using static versus dynamic transcription factor concentra-** 638 **tions as model inputs**

639 In this section, we tested whether using static, time-averaged transcription factor concentration  
640 profiles yielded comparable theoretical predictions than when instead acknowledging the fact that  
641 input transcription factor concentration changes over time. Briefly, we compared the predicted rate  
642 of transcription calculated in two ways: (1) time-averaging the instantaneous rate from the dynamic  
643 transcription factor concentration profiles over a specified time window (from 5 to 10 minutes from  
644 the 13th anaphase) and (2) using static input transcription factors already time-averaged over the  
645 same time window.

646 As a concrete example, we focused on the *hunchback* P2 enhancer with one Runt binding site. We  
647 calculated the predicted rate of transcription using the thermodynamic model given by Equation 2.  
648 First, we performed this calculation using the dynamic concentration profiles of Bicoid and Runt  
649 shown in Figure 3B and D, respectively. Briefly, the terms  $b$  and  $r$  in Equation 2 now become functions  
650 of time such that

$$Rate(t) = R \frac{p + b^6(t) p \omega_{bp} + r(t) p \omega_{rp} + b^6(t) r(t) p \omega_{bp} \omega_{rp}}{1 + b^6(t) + r(t) + b^6(t) r(t) + p + b^6(t) p \omega_{bp} + r(t) p \omega_{rp} + b^6(t) r(t) p \omega_{bp} \omega_{rp}}, \quad (S11)$$

651 where  $b(t) = [Bicoid](t)/K_b$  and  $r(t) = [Runt](t)/K_r$ . We choose a set of reasonable values for the  
652 model parameters to illustrate the calculation of  $Rate(t)$  at 30% of the embryo length. The resulting  
653 dynamic rate of transcription profile is shown in Figure S3A (blue curve). We then use this profile to  
654 calculate the time-averaged rate of transcription over the time window of 5 to 10 minutes from the  
655 13th anaphase, resulting in the green area shown in Figure S3A.

656 The predicted average rate of RNAP loading given dynamic input transcription factors can be  
657 compared to the predicted rate of RNAP loading given the average input concentrations that we used  
658 throughout the main text (Fig. 3E). Specifically, we plug the static concentration profiles of Bicoid  
659 and Runt shown in Figure 3E into Equation 2 to obtain the red area shown in Figure S3A. As shown  
660 in the figure, the predicted rate of transcription obtained by these two analysis methodologies are  
661 equivalent within error.

662 Finally, we performed this comparison between different approaches to calculate the rate of  
663 transcription as a function of position along the embryo (from 20% to 70% of the embryo length). As  
664 shown in Figure S3B, the resulting spatial profiles are comparable within error. Thus, we have shown  
665 that our approach of using time-averaged, static transcription factor concentrations as inputs to our  
666 model yield quantitatively equivalent result as accounting for the dynamic concentration profiles of  
667 these transcription factors.

### 668 **S4 Markov Chain Monte Carlo inference protocol**

669 Markov Chain Monte Carlo (MCMC) sampling is a widely used technique for robust parameter  
670 estimation using Bayesian statistics [[Geyer and Thompson, 1992](#), [Sivia and Skilling, 2006](#)]. We used  
671 the MATLAB package *MCMCstat*, an adaptive MCMC technique, which we could directly implement  
672 downstream of our data analysis pipeline [[Haario et al., 2006, 2001](#)]. Detailed instructions on how  
673 to implement the *MCMCstat* package can be found in <https://mjlaine.github.io/mcmcstat/>.

674 MCMC allows for an estimation of the set of parameter values of a model that best explain the  
675 experimental data along with their associated errors. In this work, we used MCMC to infer the set

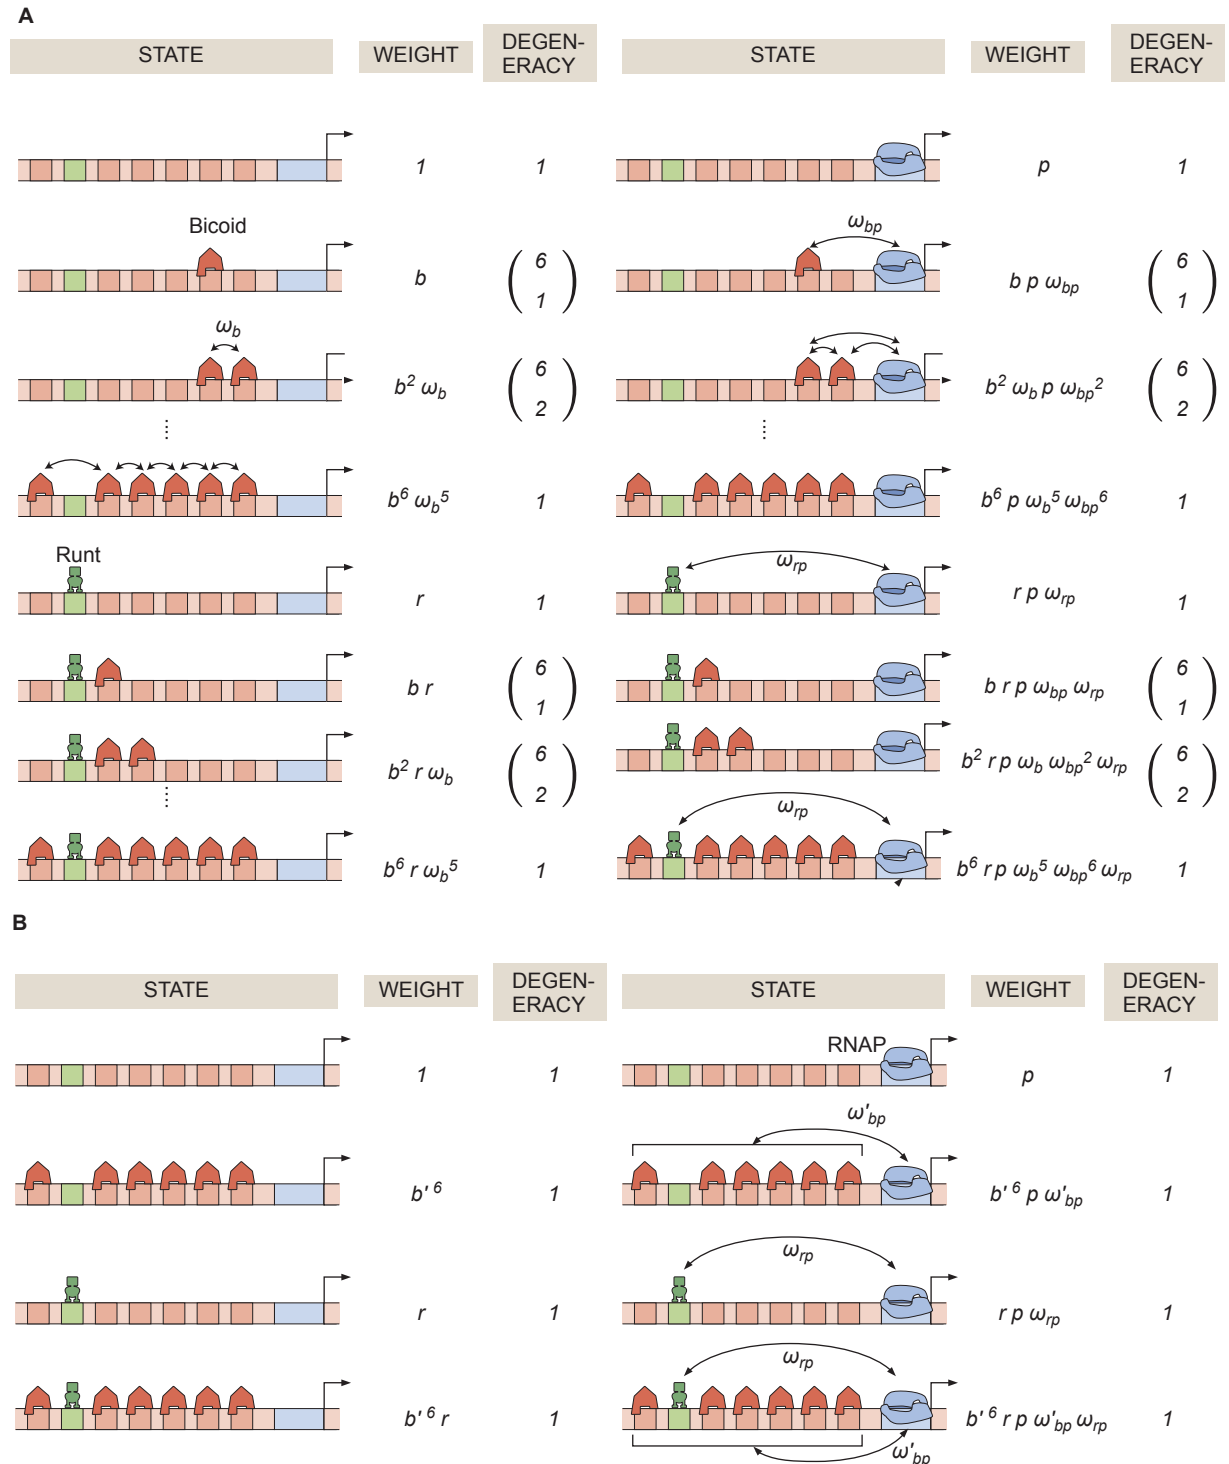

**Figure S2.** General thermodynamic model for an enhancer with six-Bicoid binding sites and one Runt binding site. **(A)** Statistical weights and degeneracy of each state the system can be found in. **(B)** Simpler form of the model from (A) in the limit of strong Bicoid-Bicoid cooperativity.

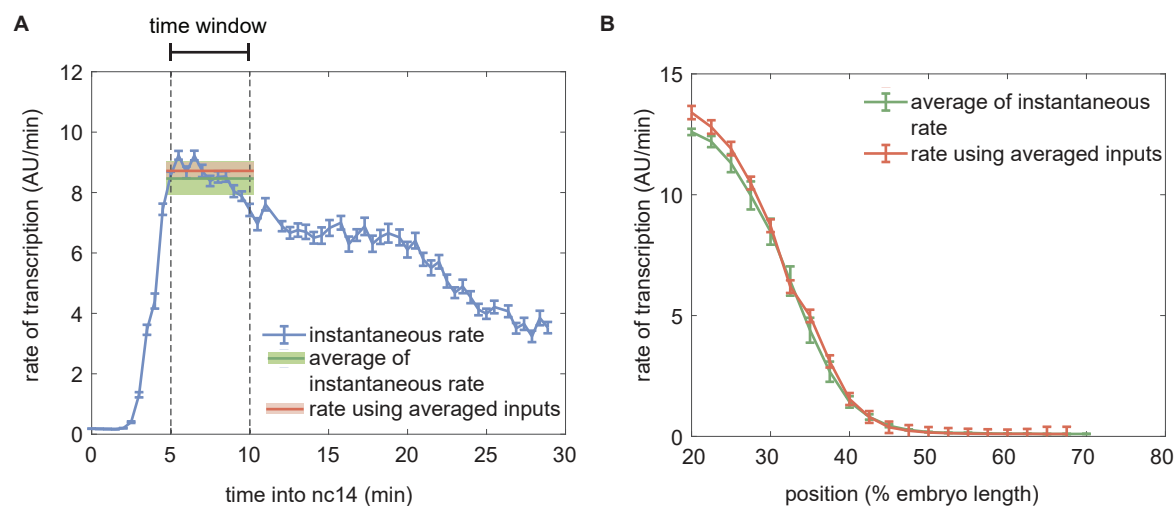

**Figure S3.** Comparison of the predicted rate of transcription using dynamic and time-averaged transcription factor concentration profiles as inputs. **(A)** Instantaneous predicted rate of transcription calculated using dynamic transcription factor concentration profiles at each time point (blue) and resulting averaged rate of transcription averaged over the time window of 5-10 minutes from the 13th anaphase (green) compared to the predicted rate of transcription obtained using the static transcription factor concentrations of Bicoid and Runt shown in Figure 3E (red). (Illustrative predictions calculated at 30% of the embryo length using  $K_b = 30(AU)$ ,  $K_r = 100(AU)$ ,  $\omega_{bp} = 100$ ,  $\omega_{rp} = 0.1$ ,  $p = 0.001$ ,  $R = 300(AU/min)$ .) **(B)** Spatial profile of the predicted rate of transcription calculated by averaging the instantaneous transcription rate (green) or by using the averaged input transcription factor concentrations as inputs (red). (A, B, error bars and shaded areas represent the standard error of mean over embryos 42 embryos generated from making pairs of independently measured six eGFP-Bicoid embryo and seven GreenLlamaTag-Runt embryo.)

676 of best fit values of the parameters in our thermodynamic models given the observed profile of the  
677 rate of transcription initiation along the anterior-posterior axis of the embryo.

678 MCMC calculates a Bayesian posterior probability distribution of each free parameter given the  
679 data by stochastically sampling different parameter values. For a given set of observations  $D$  and a  
680 model with parameters  $\theta$ , the posterior probability distribution of a particular set of values is given  
681 by Bayes' theorem

$$\underbrace{p(\theta|D)}_{\text{posterior}} \propto \underbrace{p(D|\theta)}_{\text{likelihood}} \underbrace{p(\theta)}_{\text{prior}}. \quad (\text{S12})$$

682 The prior function represents the *a priori* assumption about the probability distribution of parameter  
683 values  $\theta$ . Here, we assumed a uniform prior distribution for all parameters to reflect our ignorance  
684 about the model parameters within the following intervals:

- 685 •  $K_b$ : [0, 100] AU
- 686 •  $\omega_{bp}$ : [0, 200]
- 687 •  $p$ : [0, 1]
- 688 •  $R$ : [0, 400] AU/min
- 689 •  $K_r$ : [0, 100] AU
- 690 •  $\omega_{rp}$ : [0, 1.2]
- 691 •  $\omega_{rr}$ : [0, 100]
- 692 •  $\omega_{rrp}$ : [0, 100]

693 These intervals were justified using the following arguments.

694 First, because we observed a gradual modulation of the rate of transcription by both Bicoid and  
695 Runt in the middle region of the embryo we reasoned that the binding sites for these transcription  
696 factors were not saturated. As a result, we posited that the real dissociation constant should  
697 be between the minimum and maximum measured values of Bicoid and Runt (Fig. S10). Our  
698 measurements of Bicoid and Runt concentration yield fluorescence values over the 0-100 AU range  
699 for the embryo region that we used for contrasting our model and experimental data (20-50% of the  
700 embryo length), such that the dissociation constants ( $K_b$  and  $K_r$ ) should not exceed the maximum  
701 value of the Bicoid or Runt concentration.

702 Second,  $\omega_{bp}$  represents the cooperativity between Bicoid complex and RNAP. In the statistical  
703 mechanics framework, this cooperativity can be expressed using the interaction energy between  
704 Bicoid and RNAP,  $\Delta\epsilon_{bp}$ , such that  $\omega_{bp} = \exp(-\beta\Delta\epsilon_{bp})$ , where  $\beta = \frac{1}{k_B T}$ ,  $k_B$  is the Boltzmann constant  
705 and  $T$  is the temperature. There is not much known about *in vivo* interaction energies between  
706 Bicoid and RNAP complex, thus we tried several different bounds until we found a narrow enough  
707 parameter bound with unimodal distribution of the posterior chain. As we could see from the  
708 corner plots in Figure 4C, there is a positive correlation between  $K_b$  and  $\omega_{bp}$ . Thus, we constrained  
709 the  $\omega_{bp}$  intervals by finding an interval that gives both well-constrained  $K_b$  and  $\omega_{bp}$  (Fig. 4C).

710 Third,  $R$  represents the rate of RNAP loading when the promoter is occupied, thus it is constrained  
711 by the maximum observed rate of RNAP loading (Fig. S10).

712 Fourth,  $p = [RNAP]/K_p$  represents the concentration of RNAP divided by its dissociation constant.  
713 Recall that the predicted rate of transcription from *hunchback* P2 in the limit where the Bicoid  
714 concentration reaches zero is given by

$$\text{Rate}([Bicoid] \rightarrow 0) = R \frac{p}{1+p}. \quad (\text{S13})$$

715 This rate of transcription at the posterior region, where Bicoid reaches zero, is much lower than  
716 that at the anterior region where Bicoid saturates given by  $R$  (Fig. S10). As a result, we can write the

717 inequality

$$R \frac{p}{1+p} \ll R. \quad (S14)$$

718 such that

$$\frac{p}{1+p} \ll 1, \quad (S15)$$

719 which holds if  $p \ll 1$ .

720 Finally, we did not have good estimates for the intervals of either Runt-Runt cooperativity,  $\omega_{rr}$ , or  
721 higher-order cooperativity,  $\omega_{rrp}$ . Thus, we initially started with an interval of  $[0, 100]$ , of the same  
722 order as the interval we used  $\omega_{bp}$ . We then explored whether this parameter bound was sufficient  
723 to give us constrained values of  $\omega_{rr}$  and  $\omega_{rrp}$ . As we showed in Figure S15D, this interval gives  
724 reasonably constrained values of  $\omega_{rr}$  and  $\omega_{rrp}$ . As shown in Figure 6 and Figure S15, we posit that  
725 the  $\omega_{rr}$  parameter is not well-constrained not because of its width of the interval, but because it  
726 is not as essential for the model fit to the data as it is to include  $\omega_{rrp}$  into the model. Overall, our  
727 MCMC inference results as well as the corner plots shown demonstrate that our parameter intervals  
728 chosen were reasonable.

## 729 **S5 Comparison of different modes of repression**

730 Transcriptional repressors have been classified into two broad categories: short-range and long-  
731 range, depending on the genomic length scale that they act on [[Courey and Jia, 2001](#), [Li and Gilmour, 2011](#)]. Long-range repression is realized by the recruitment of chromatin modifiers. In contrast,  
732 short-range repressors act within 100-150 bp by interacting with nearby transcription factors or  
733 with the promoter [[Li and Gilmour, 2011](#)]. Traditionally, the molecular mechanism of short-range  
734 repressors, such as Runt, have been further classified into three categories: “direct repression”,  
735 “competition”, and “quenching” [[Gray et al., 1994](#), [Jaynes and O’Farrell, 1991](#), [Arnosti et al., 1996](#),  
736 [Kulkarni and Arnosti, 2005](#)]. In “direct repression”, the repressor inhibits the binding of RNAP to  
737 the promoter (Fig. S4A). “Competition” denotes a repressor that competes with an activator for  
738 the same DNA binding location (Fig. S4B). This molecular mechanisms has been proposed for the  
739 action of Giant and Krüppel repressors on the *even-skipped* stripe 2 enhancer, where some activator  
740 and repressor binding sites partially overlap [[Small et al., 1992](#)]. Lastly, “quenching” corresponds to  
741 the case where the repressor and activator do not interact with each other directly. Instead, the  
742 repressor inhibits the activators’ action of recruiting the RNAP (Fig. S4C).  
743

744 Despite several classic studies of the molecular mechanism of repressors in the early fly embryo  
745 [[Gray et al., 1994](#), [Ip et al., 1992](#), [Bothma et al., 2011](#), [Jaynes and O’Farrell, 1991](#)], the mechanisms  
746 of many repressors remain unknown. Note that, even for the same repressor, the mode of  
747 repression might not be the same depending on, for example, its sequence context [[Koromila  
748 and Stathopoulos, 2019](#), [Hang and Gergen, 2017](#)]. For example, it has been proposed that Runt  
749 repressor acts with different mechanisms in different regulatory elements of the *sloppy-paired*  
750 gene [[Hang and Gergen, 2017](#)]. In this section, we derive a thermodynamic model from each mode  
751 of repression and compare their explanatory power in the context of our data stemming from  
752 the *hunchback* P2 enhancer containing one Runt binding site. Note that, in the main text, we  
753 already developed a thermodynamic model for the “direct repression” scenario (Section S2). As a  
754 result, in this section, we focus on deriving the thermodynamic models for the “competition” and  
755 “quenching” scenarios, but repeat the result of the derivation for the “direct repression” here for  
756 ease comparison between different models.

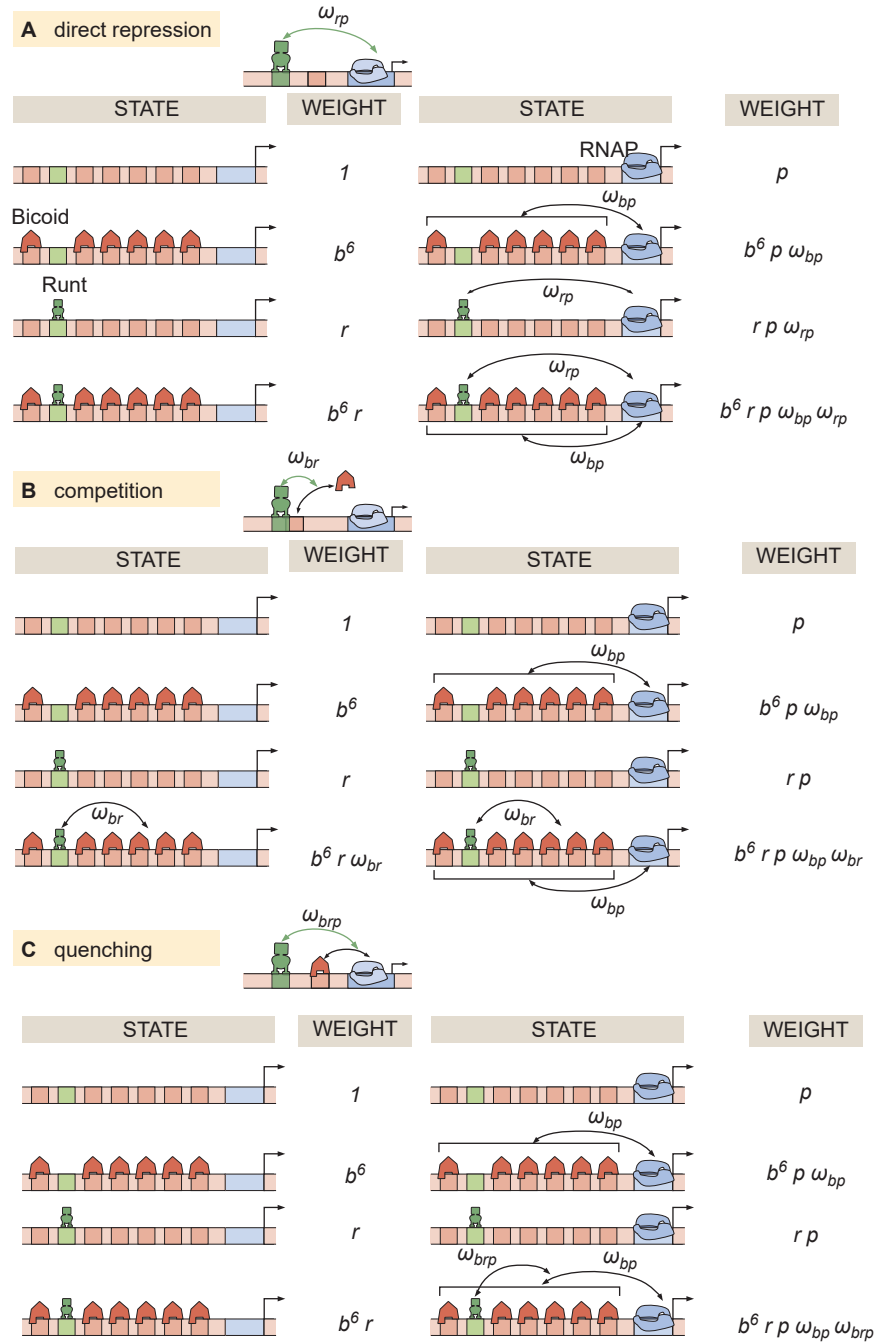

**Figure S4.** Thermodynamic models for different modes of repression. States and statistical weights corresponding to the *hunchback* P2 enhancer with one Runt binding site for the **(A)** direct repression, **(B)** competition, and **(C)** quenching mechanisms.

757 **S5.1 Derivation of models for each scenario of repression for *hunchback* P2 with**  
758 **one Runt binding site**

759 S5.1.1 Modeling repression for *hunchback* P2 with one Runt binding site: direct repression

760 For completeness, we repeat the expression for the direct repression scenario as shown in Sec-  
761 tion S2 and Figure S4A. The probability of finding RNAP bound to the promoter,  $p_{bound}$ , is calculated  
762 by dividing the sum of all statistical weights featuring RNAP by the sum of the weights of all possible  
763 microstates. The calculation of  $p_{bound}$ , combined with Equation 1, leads to the expression

$$Rate = R p_{bound} = R \frac{p + b^6 p \omega_{bp} + r p \omega_{rp} + b^6 r p \omega_{bp} \omega_{rp}}{1 + b^6 + r + b^6 r + p + b^6 p \omega_{bp} + r p \omega_{rp} + b^6 r p \omega_{bp} \omega_{rp}}, \quad (S16)$$

764 where the parameters are as defined in Figure 2.

765 S5.1.2 Modeling repression for *hunchback* P2 with one Runt binding site: competition

766 In the competition scenario, Runt binding makes Bicoid binding less likely. This mechanism can be  
767 captured by an interaction term between Bicoid and Runt given by  $\omega_{br}$ . Building on our assumption  
768 of strong Bicoid-Bicoid cooperativity, we posit that Runt disfavors the state with six bound Bicoid  
769 molecules. We can enumerate the states and weights from Fig. S4B to calculate the  $Rate$  ( $\propto p_{bound}$ ),  
770 which leads to

$$Rate = R \frac{p + b^6 p \omega_{bp} + r p + b^6 r p \omega_{bp} \omega_{br}}{1 + p + b^6 + r + b^6 r \omega_{br} + b^6 p \omega_{bp} + r p + b^6 r p \omega_{bp} \omega_{br}}. \quad (S17)$$

771 S5.1.3 Modeling repression for *hunchback* P2 with one Runt binding site: quenching

772 In the quenching scenario, Runt reduces the magnitude of the cooperativity between the Bicoid  
773 complex and RNAP by a factor  $\omega_{brp}$ . We can enumerate the states and weights from Fig. S4C, leading  
774 to a rate of transcription given by

$$Rate = R \frac{p + b^6 p \omega_{bp} + r p + b^6 r p \omega_{bp} \omega_{brp}}{1 + p + b^6 + r + b^6 r + b^6 p \omega_{bp} + r p + b^6 r p \omega_{bp} \omega_{brp}}. \quad (S18)$$

775 With these expressions for each repression mechanism in hand, we can now compare how each  
776 model fares against our experimental data.

777 **S5.2 Comparing the three models of repression with the one-Runt binding site data**

778 We used the MCMC sampling to fit each model to our experimentally measured initial rate of  
779 transcription over the anterior-posterior axis of the embryo. As shown in Figure S5A, B, and C, we  
780 see that all three models can explain the [100] and [010] construct data relatively well. However,  
781 the competition model resulted in a qualitatively poor fit to the [001] construct as shown by the  
782 lack of saturation in the most anterior region of the embryo (Fig. S5C, ii). The direct repression and  
783 quenching models showed equally good fits to the data stemming from this construct.

784 **S5.3 Predicting two-Runt binding sites data for each mode of repression**

785 We further tested these different models of repression by using the parameters inferred from  
786 the one-Runt binding site constructs to predict the rate of initiation for the two-Runt binding sites  
787 constructs. As reasoned in the main text, we began by assuming that the two Runt molecules act  
788 independently of each other such that there are no interactions between Runt molecules. Figure S6



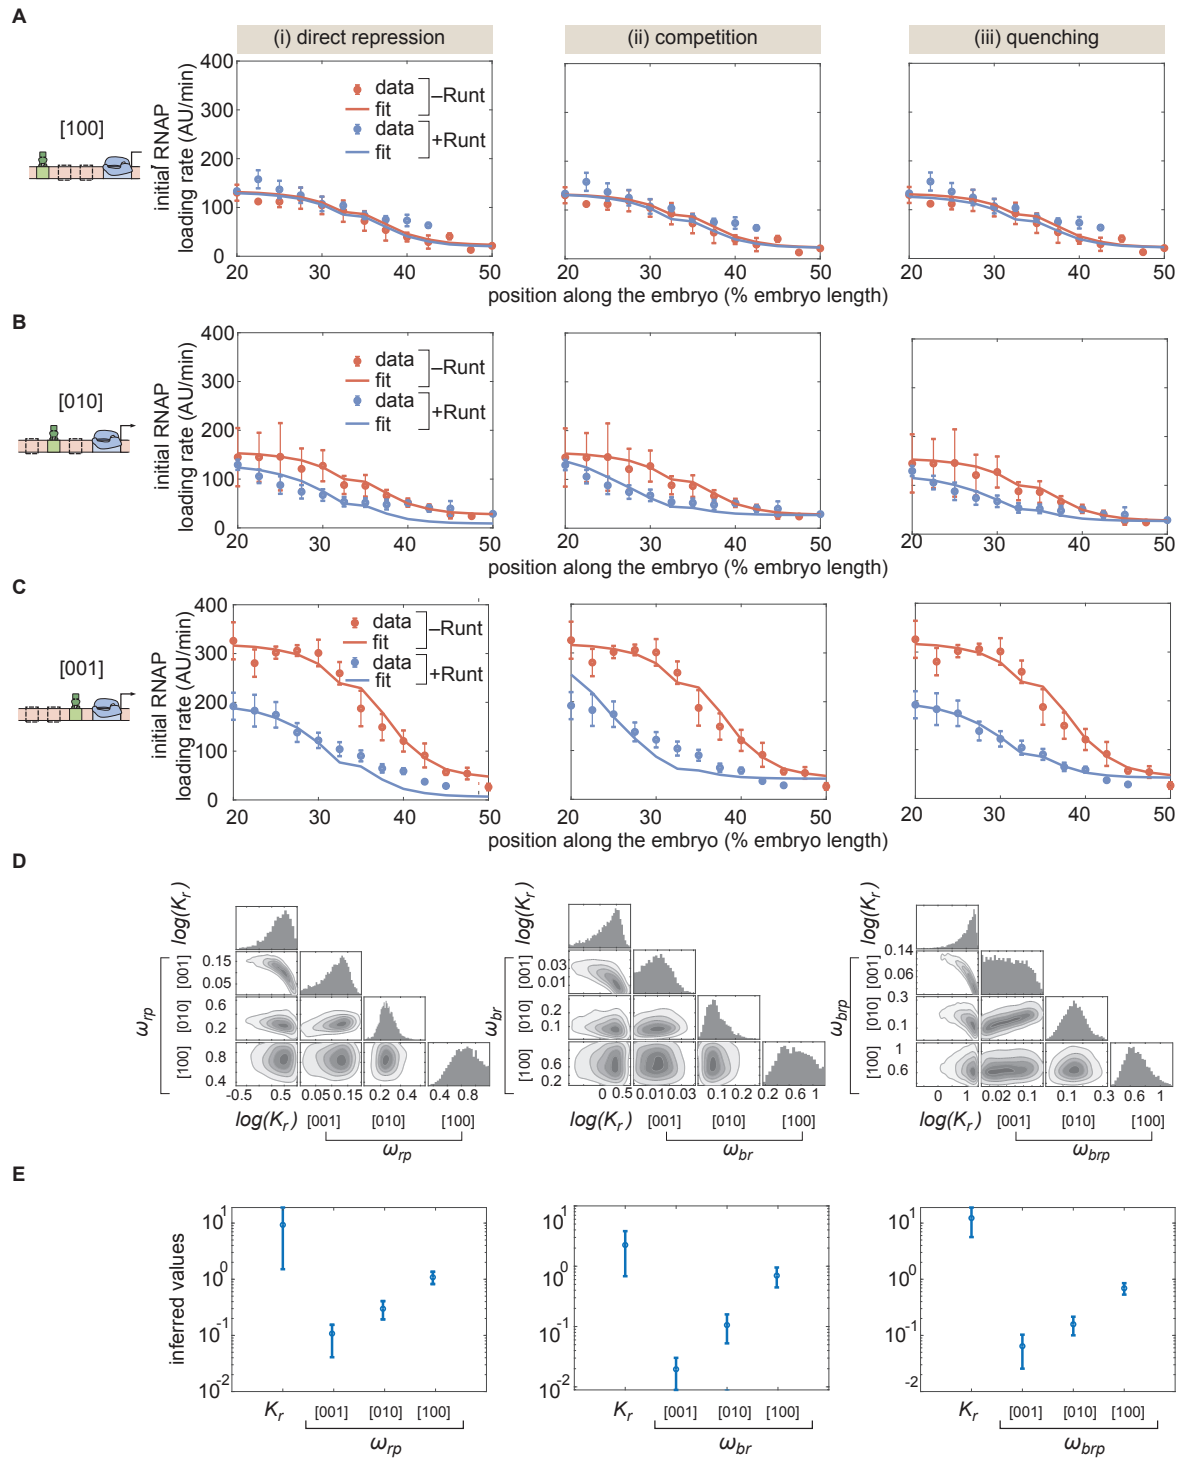

**Figure S5.** MCMC fitting to the *hunchback* P2 with one Runt binding site constructs using different models of repression. **(A,B,C)** MCMC fits for three modes of repression, (i) direct repression, (ii) competition, and (iii) quenching, for our three one-Runt site constructs, **(A)** [100], **(B)** [010], and **(C)** [001]. **(D)** Corner plots resulting from MCMC inference on the three one-Runt site constructs for each model. **(E)** Inferred parameters from MCMC fitting. (A,B, and C, error bars represent standard error of the mean over  $\geq 3$  embryos; E, error bars represent standard deviation of the posterior chain.)

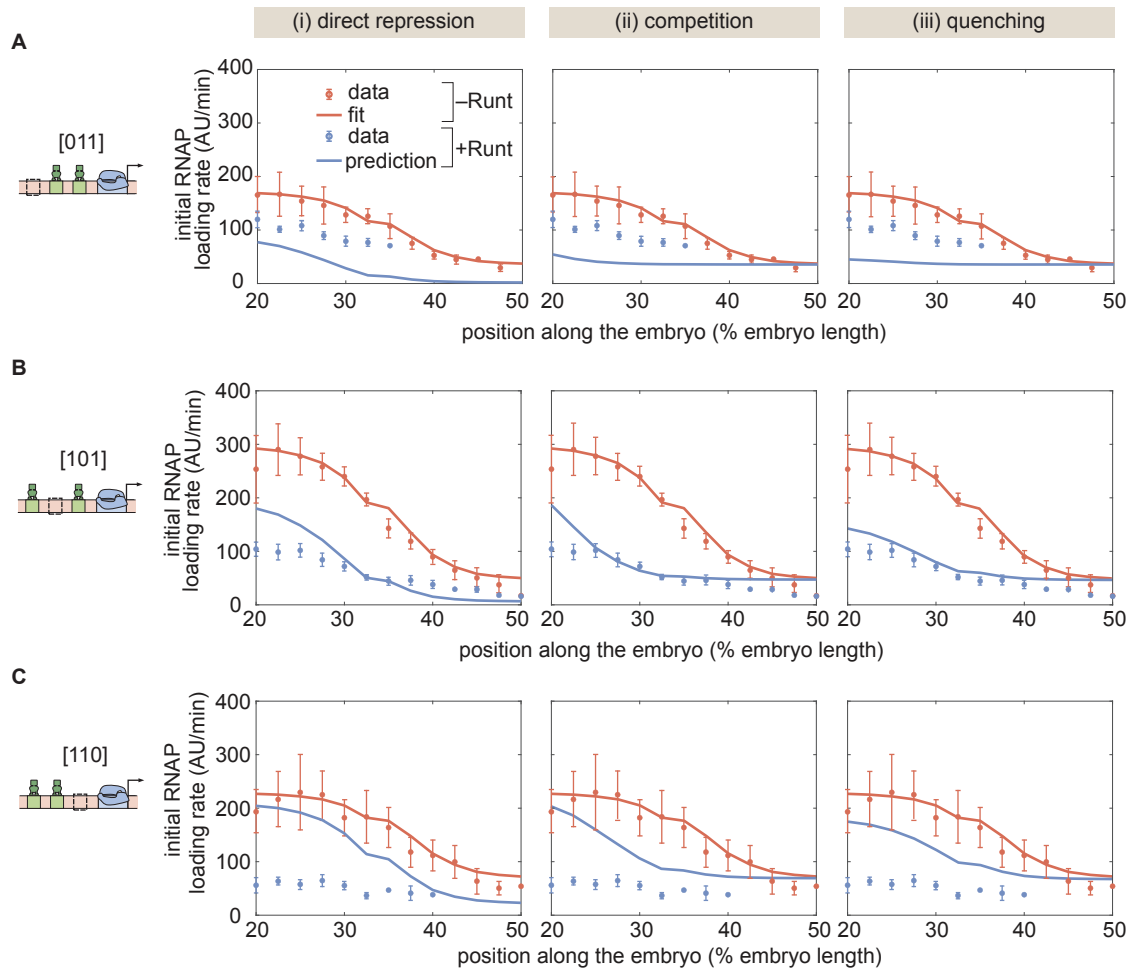

**Figure S6.** Prediction for two-Runt binding sites constructs based on the inferred parameters from the one-Runt binding site cases for different modes of repression for the **(A)** [011], **(B)** [101], and **(C)** [110] constructs. The model assumes no interactions between Runt molecules. (A,B, and C, error bars represent standard error of the mean over  $\geq 3$  embryos.)

789 shows this parameter-free prediction for our two-Runt binding sites constructs for all three modes  
 790 of repression. As shown in the figure, none of the models can explain the data, suggesting the need  
 791 to invoke additional interactions between the molecular players of our model.

792 Next, we considered whether Runt-Runt pairwise or higher-order cooperativities had to be invoked  
 793 in order to explain the two-Runt binding sites data for both the competition and quenching mecha-  
 794 nisms. For the competition model, we considered Runt-Runt cooperativity,  $\omega_{rr}$ , and Runt-Runt-Bicoid  
 795 higher-order cooperativity,  $\omega_{br}$ , in addition to the Runt-Bicoid interaction term  $\omega_{br}$ . In the quenching  
 796 scenario, we accounted for Runt-Runt cooperativity,  $\omega_{rr}$ , and Runt-Runt-Bicoid-RNAP higher-order  
 797 cooperativity,  $\omega_{brp}$ . For both the competition (Fig. S7) and quenching (Fig. S8) mechanisms, we  
 798 observed a qualitatively similar trend to that observed for direct repression (Fig. 6). Specifically,  
 799 as shown in Figures S7C and S8C, considering pairwise cooperativity did not significantly improve  
 800 the MCMC fits to the data for either model considered. Further, considering only the higher-order  
 801 cooperativity also did not improve the fits for both competition and quenching mechanisms as  
 802 shown in Figure S7D and Figure S8D. Invoking both Runt-Runt cooperativity and higher-order coop-

803 erativity improved the fits qualitatively for both competition and quenching mechanisms as shown  
804 in Figure S7E and Figure S8E.

805 While the quenching model showed almost equally good MCMC fits to the data as the direct  
806 repression model, the competition model showed qualitatively poor fits in any combination of  
807 cooperativities. In particular, there was a significant mismatch in the most anterior region of the  
808 embryo, where Bicoid is thought to saturate *hunchback* expression. While we do not view these fits  
809 as conclusive evidence to support one mechanism over the other, an exercise that would require a  
810 new round of experimentation, we conclude that higher-order cooperativity is required to explain  
811 the data from the two-Runt binding sites constructs regardless of the choice of mechanism of Runt.

## 812 **S6 Design of synthetic enhancer constructs based on the *hunchback* P2 en-** 813 **hancer**

814 The Runt binding sites were introduced into the *hunchback* P2 minimal enhancers at the positions  
815 determined by [Chen et al. \[2012\]](#). To make this possible, the authors chose positions containing  
816 presumed neutral DNA sequences, meaning that these DNA locations did not contain obvious  
817 motifs for Bicoid or Zelda, the major input transcription factors that regulate this enhancer. Then,  
818 these DNA sequences were mutated to turn them into Runt binding sites.

819 To ensure that this process did not perturb the binding sites for Bicoid and Zelda we resorted to  
820 the [Advanced PATSER entry form \[Hertz et al., 1990, Hertz and Stormo, 1999\]](#) which identifies the  
821 location of transcription factor binding sites from a sequence of DNA based on position weight  
822 matrices. We used position weight matrices for Bicoid and Zelda from [Park et al. \[2019\]](#). PATSER  
823 was run with the settings described in [Eck et al. \[2020\]](#) for both the *hunchback* P2 enhancer and the  
824 *hunchback* P2 enhancer with three Runt binding sites (from [Chen et al. \[2012\]](#)) for Bicoid and Zelda,  
825 respectively. The result of this analysis for these two constructs is shown for each transcription  
826 factor in Figure S9A. Here, we took a the PATSER score cutoff—for considering a given sequence  
827 to be a binding site—of 3 as in [Eck et al. \[2020\]](#). We observed that the recognized binding motifs  
828 for both Bicoid and Zelda were identical between the two constructs, meaning that we did not  
829 add additional Bicoid or Zelda binding sites by introducing the Runt motifs. The resulting synthetic  
830 enhancer with three Runt binding sites with mapped binding sites for Bicoid, Zelda (Fig. S9A), and  
831 Runt [[Chen et al., 2012](#)] is shown in Figure S9B as a reference. The position of the Runt binding  
832 sites are noted from their distance from the promoter (which is marked as 0).

## 833 **S7 Quantifying the nuclear concentration of LlamaTag-Runt**

834 The major caveat in the eGFP:LlamaTag-Runt fluorescence measurements is that the raw nuclear  
835 fluorescence that we measured consists of two populations: eGFP *bound* to the LlamaTag-Runt,  
836 and *free, unbound* eGFP. Thus, in order to measure nuclear Runt concentration, we need to factor  
837 out the contribution from free eGFP to the overall fluorescence.

838 We followed the procedure described in [Bothma et al. \[2018\]](#) which consists of using cytoplasmic  
839 fluorescence to calculate the free nuclear eGFP under two assumptions. First, we posit that most  
840 of the transcription factors reside in the nucleus such that the cytoplasmic fluorescence mostly  
841 reports on free cytoplasmic eGFP. Second, we assume that the nucleus-to-cytoplasm ratio of free  
842 eGFP is kept constant at a measured chemical equilibrium of  $K_G = GFP_C / GFP_N = 0.8$ , where  $GFP_C$   
843 and  $GFP_N$  are the eGFP fluorescence in nuclei and cytoplasm in the absence of LlamaTag [[Bothma  
844 et al., 2018](#)].

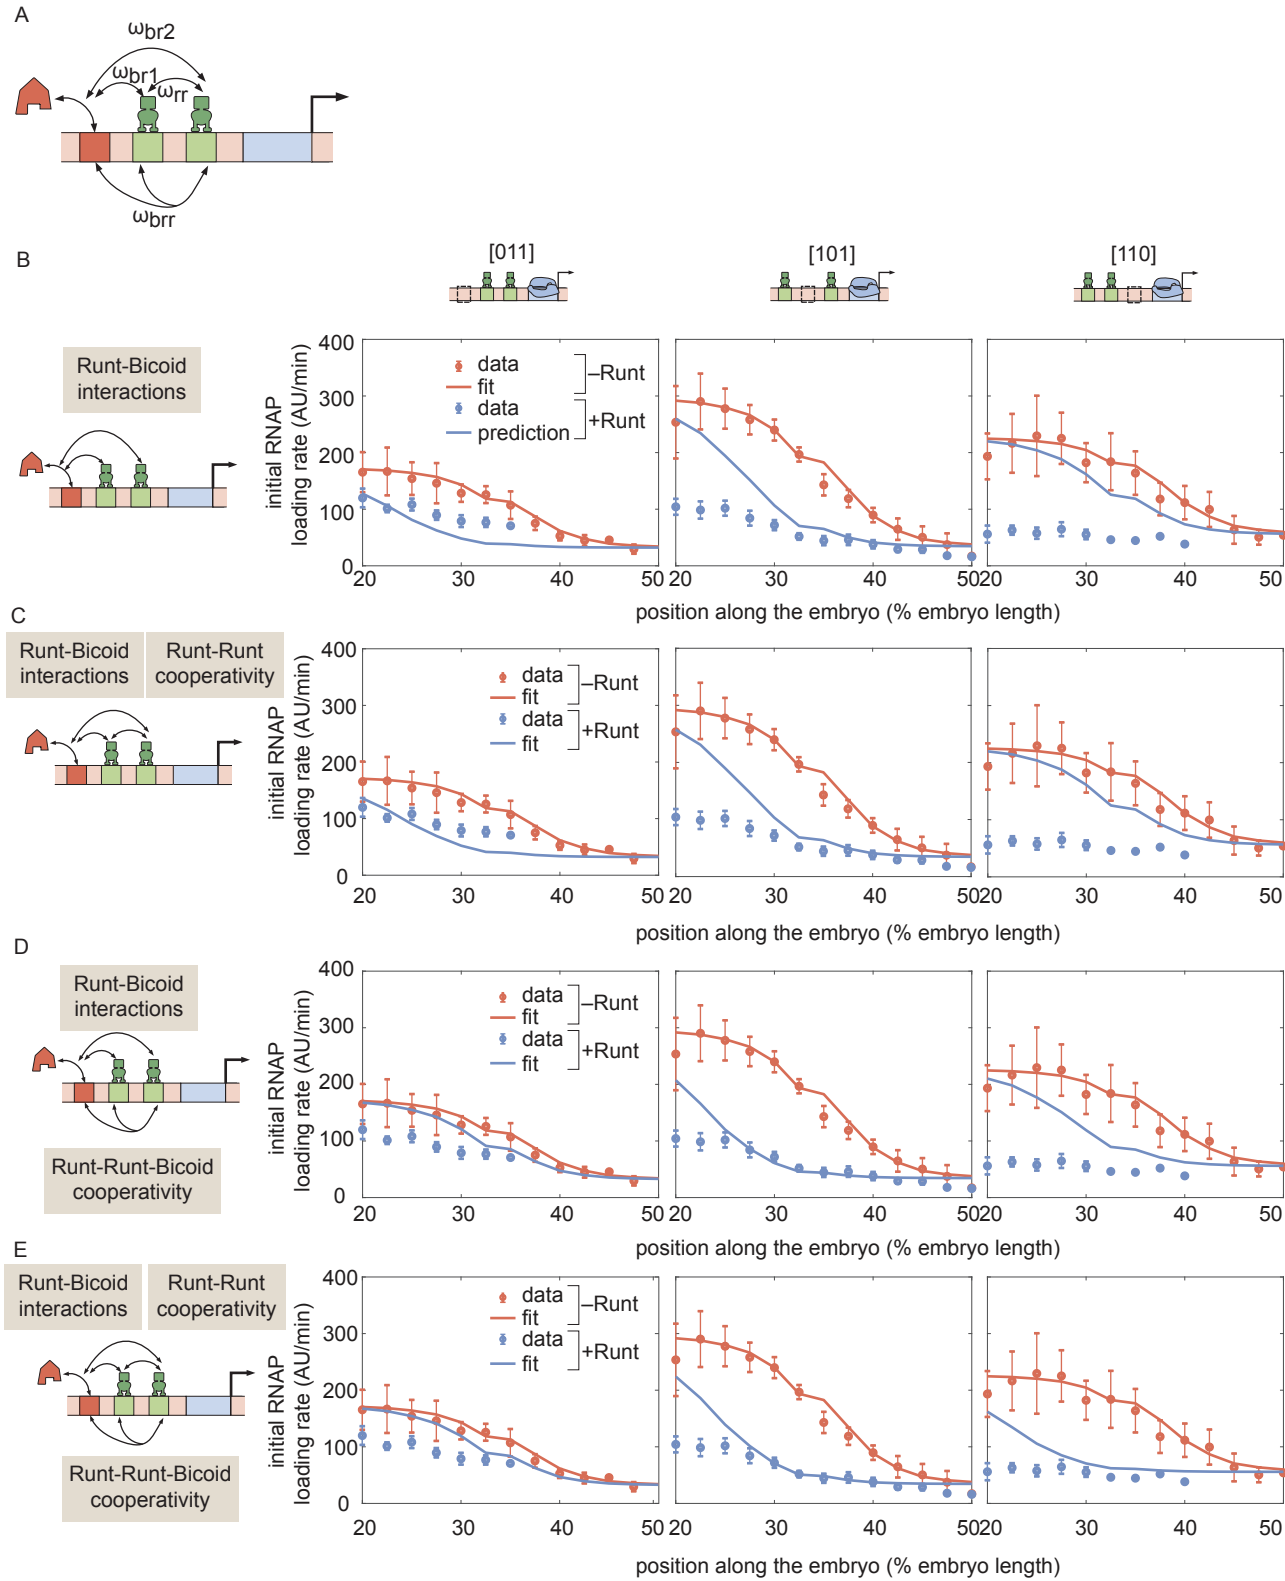

**Figure S7.** Prediction for *hunchback* P2 transcription initiation rate with two-Runt binding sites under the competition scenario for different combinations of cooperativities. See caption in the next page.

**Figure S7.** Prediction for *hunchback* P2 transcription initiation rate with two-Runt binding sites under the competition scenario for different combinations of cooperativities. **(A)** Schematic of cooperativity terms considered: Runt-Runt cooperativity given by  $\omega_{rr}$ , and Runt-Runt-Bicoid complex higher-order cooperativity captured by  $\omega_{br1}$ , in addition to the competition terms  $\omega_{br1}$  and  $\omega_{br2}$ . **(B)** Zero-parameter prediction using the inferred parameters from zero- and one-Runt binding site constructs. **(C,D,E)** Best MCMC fits for our three two-Runt binding sites constructs considering **(C)** Runt-Runt cooperativity, **(D)** Runt-Runt-Bicoid complex higher-order cooperativity, and **(E)** both Runt-Runt cooperativity and Runt-Runt-Bicoid complex higher-order cooperativity. (B,C,D, and E, error bars represent standard error of the mean over  $\geq 3$  embryos.)

845 As shown in [Bothma et al. \[2018\]](#), the nuclear concentration of the GFP-tagged transcription factor,  
846  $GFP - TF_N$ , is given by

$$GFP - TF_N = Fluo_N - \frac{Fluo_C}{K_G}, \quad (S19)$$

847 where  $Fluo_N$  and  $Fluo_C$  are the eGFP fluorescence in nuclei and cytoplasm, respectively, that  
848 we measured in the embryos with both eGFP and LlamaTagged Runt. The resulting nuclear  
849 concentration of LlamaTag-Runt is shown in Figure 3B.

## 850 **S8 Quantitative interpretation of MS2 signals**

851 The MS2 signal reports on three features of transcriptional dynamics: 1) the initial RNAP loading  
852 rate, 2) the duration of transcription, and 3) the fraction of loci that engage in transcription at any  
853 time point in the nuclear cycle. In this section, we will explain in further detail how we extract these  
854 features from the MS2 signal over nuclear cycle 14.

### 855 **S8.1 Extracting the initial RNAP loading rate**

856 The initial rate of RNAP loading corresponds the average transcription rate observed after transcrip-  
857 tional onset and until the MS2 signal reaches its peak value during nuclear cycle 14. In order to  
858 measure this rate, we followed the protocol described in [Garcia et al. \[2013\]](#). Briefly, as shown in  
859 Figure S10A, we fitted a line to the MS2 time trace (averaged over nuclei within a spatial window of  
860 2.5% of the embryo length) within the time window of 5 to 10 minutes after the 13th anaphase. The  
861 slope of this line reported on the initial rate of RNAP loading (Fig. 3G). The spatial profiles of this  
862 initial rate of RNAP loading across all our synthetic enhancer constructs and genotypes are shown  
863 in Figure S10B.

### 864 **S8.2 Extracting the duration of transcription**

865 In the main text, we focused on the theoretical prediction of the initial rate of transcription. However,  
866 the length of the time window over which transcription occurs [[Lammers et al., 2020](#)] is another  
867 regulatory knob that, in principle, Runt could modulate to dictate gene expression patterns. We  
868 sought to determine the duration of time over which transcription occurs to assess whether Runt  
869 affects not only the initial rate of transcription, but also the time window over which transcription  
870 could initiate. To quantify the effective duration of transcription initiation, we resorted to the  
871 analysis methodology developed in [Garcia et al. \[2013\]](#). Briefly, we parametrized the MS2 signal  
872 decay regime—after transcription reaches its peak and becomes slower than the unloading rate  
873 [[Garcia et al., 2013](#)—as an exponential decay (Fig. S11A). Thus, we can describe the MS2 spot  
874 fluorescence trace in the decay regime as

$$Fluo(t) = Fluo_{max} e^{-(t-T_{peak})/\tau}, \quad (S20)$$

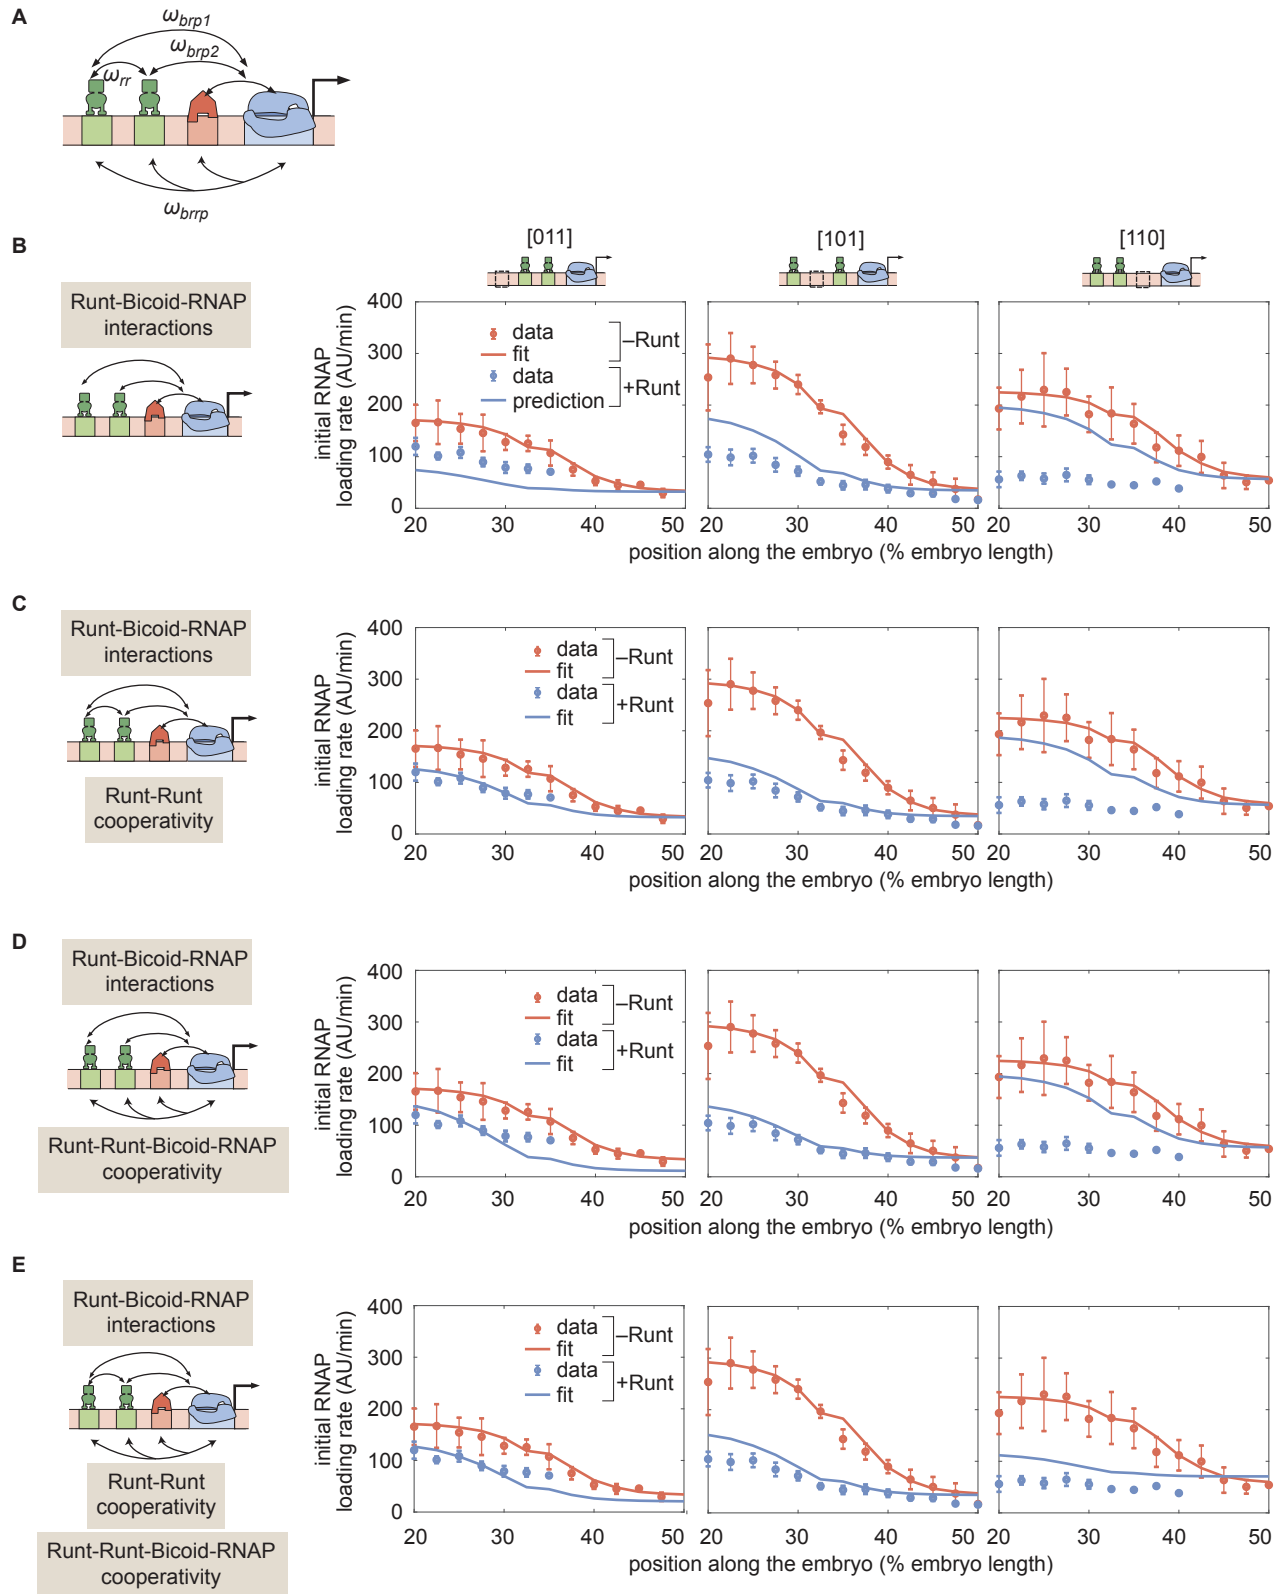

**Figure S8.** Prediction for *hunchback* P2 transcription initiation rate with two-Runt binding sites under the quenching mechanism for different combinations of cooperativities. See caption in the next page.

**Figure S8.** Prediction for *hunchback* P2 transcription initiation rate with two-Runt binding sites under the quenching mechanism for different combinations of cooperativities. **(A)** Schematics of additional cooperativities considered: Runt-Runt cooperativity  $\omega_{rr}$  and Runt-Runt-Bicoid-RNAP complex higher-order cooperativity  $\omega_{brpp}$ . **(B)** Zero-parameter prediction using the inferred parameters from one-Runt binding site constructs. **(C,D,E)** Best MCMC fits for our three two-Runt binding sites constructs considering **(C)** Runt-Runt cooperativity, **(D)** Runt-Runt-Bicoid-RNAP higher-order cooperativity, and **(E)** both Runt-Runt cooperativity and Runt-Runt-Bicoid-RNAP higher-order cooperativity. (B,C,D, and E, error bars represent standard error of the mean over  $\geq 3$  embryos.)

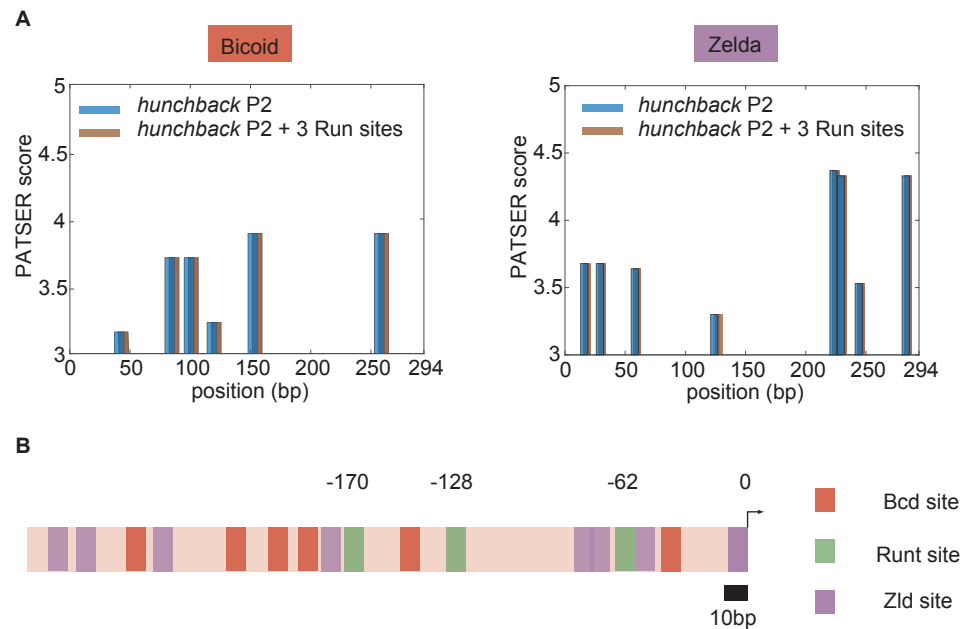

**Figure S9.** Bioinformatically predicted architecture of major transcription factor binding sites in the *hunchback* P2 minimal enhancer with three Runt binding sites. **(A)** PATSER scores for Bicoid and Zelda for *hunchback* P2 (blue) and *hunchback* P2 with three Runt sites (brown). The binding motifs with PATSER scores higher than three are shown. We concluded that neither Bicoid nor Zelda binding sites were created or removed by the introduction of these three Runt binding motifs. **(B)** A schematic diagram of *hunchback* P2 minimal enhancer with three Runt binding sites with mapped binding sites for Bicoid and Zelda from (A) and Runt binding sites from [Chen et al. \[2012\]](#). The position of Runt binding sites are noted with their distance from the promoter (marked as 0).

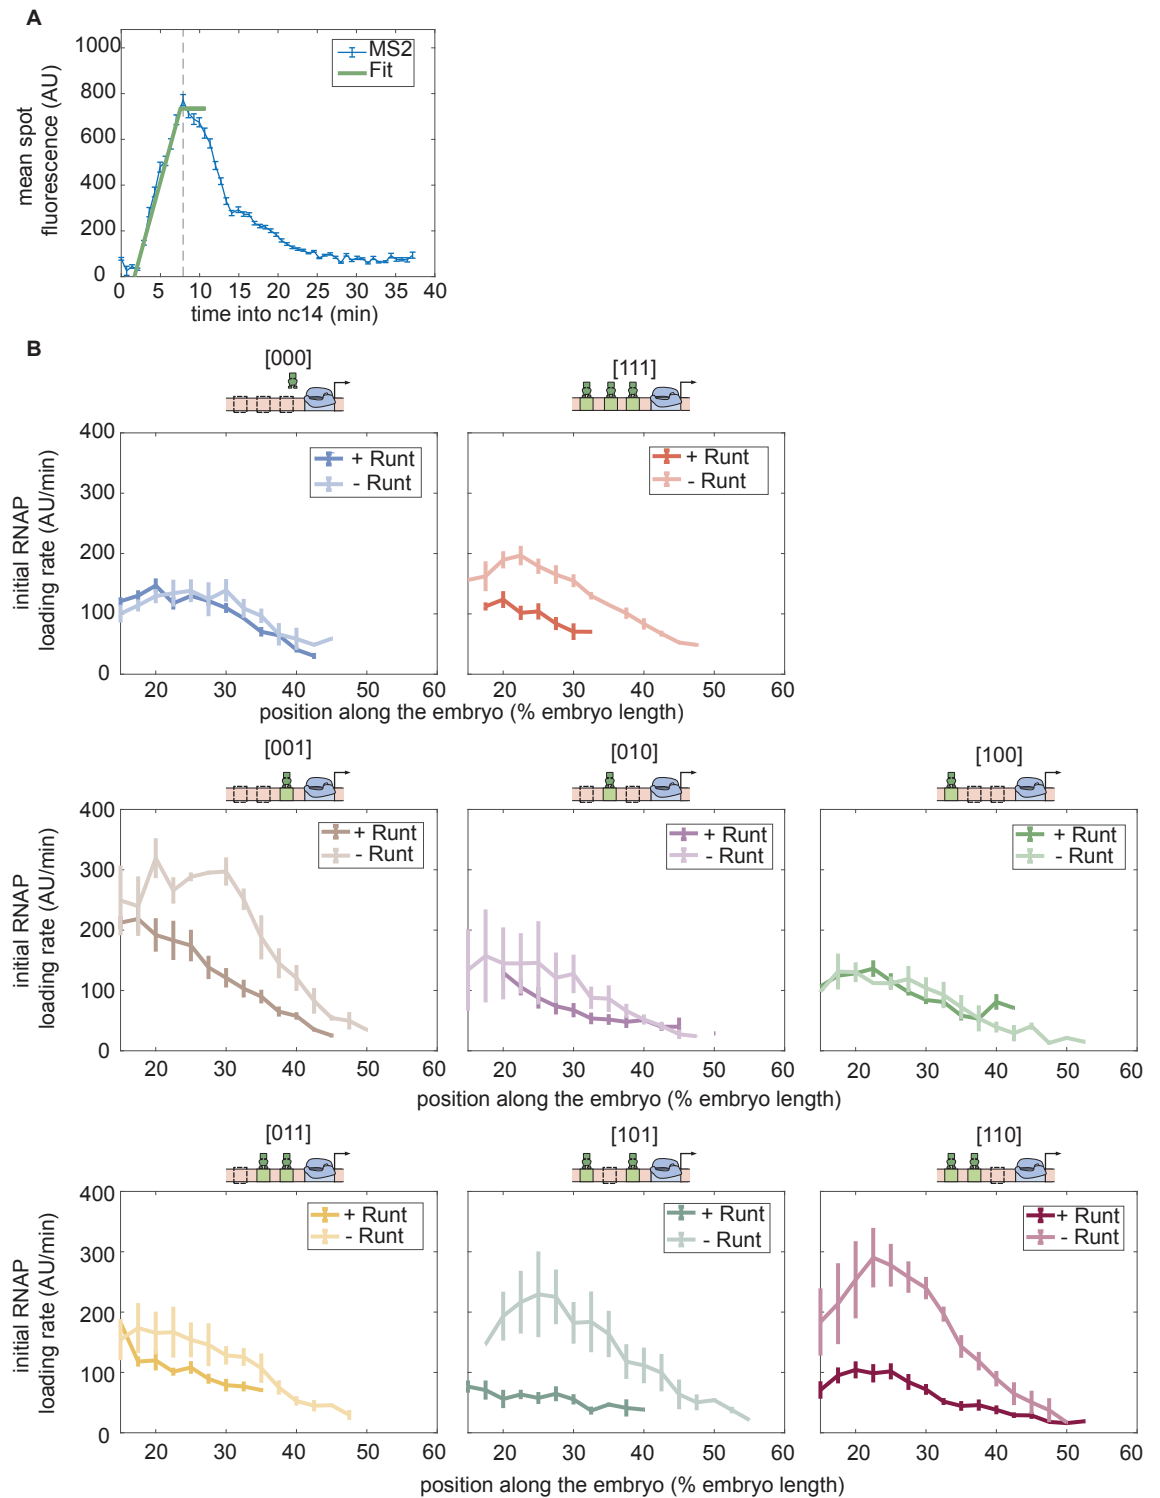

**Figure S10.** Initial rate of RNAP loading in nuclear cycle 14 across the anterior-posterior axis for different constructs, with or without Runt protein. **(A)** Schematic showing how the initial rate of RNAP loading is measured by extracting the slope resulting from a linear fit to the MS2 time traces at the beginning of nuclear cycle 14. **(B)** Initial rate of RNAP loading along the embryo length for each construct in the presence and absence of Runt for each of our synthetic enhancer construct. (B, Error bars represent standard error of the mean over  $\geq 3$  embryos.)



875 where  $T_{peak}$  represents the time point where the MS2 spot fluorescence reaches its peaks, and  $\tau$  is  
876 the decay time.

877 Given the sometimes noisy MS2 traces (data not shown), we fitted an exponential curve to the more  
878 robust integral of the MS2 spot fluorescence over time from  $T_{peak}$  to the end of nuclear cycle 14 as  
879 shown in Figure S11B. This quantity is proportional to the amount of mRNA produced between the  
880 integration bounds [Garcia et al., 2013]. The resulting accumulated mRNA time trace is then fitted  
881 to the integrated form of Equation S20, which is given by

$$mRNA(t) = mRNA_{max}(1 - e^{-(t-T_{peak})/\tau}), \quad (S21)$$

882 where  $mRNA_{max}$  is the accumulated mRNA at the end of nuclear cycle 14.

883 The resulting profiles of the duration of transcription along the embryo for our all synthetic enhancer  
884 constructs are illustrated in Figure S11C in the presence and absence of Runt protein. As shown in  
885 the figure, this duration time is not significantly modulated by Runt repressor.

### 886 S8.3 Calculation of the fraction of competent nuclei

887 Another quantity that could be modulated by Runt repressor is the fraction of loci that ever engage  
888 in transcription during a given nuclear cycle, which we termed as the “fraction of competent loci”.  
889 As demonstrated by Garcia et al. [2013], Dufourt et al. [2018], Lammers et al. [2020] and Eck et al.  
890 [2020], this fraction of transcriptionally competent loci is modulated along the anterior-posterior  
891 axis, presumably due to the action of transcription factor gradients.

892 To show a concrete example of how this quantity is calculated, we take data from one construct  
893 ([000]) showing the MS2 spot fluorescence time traces from individual loci of transcription as shown  
894 in Figure S12A. Here, columns represent time points during nuclear cycle 14, and rows represent  
895 individual transcriptional loci. As shown in the figure, roughly 80% of the loci, labeled as “competent  
896 loci”, show active transcription during nuclear cycle 14. However, the remaining 20% of the loci never  
897 engage in transcription, which we termed as “incompetent loci”. Because these two populations  
898 exhibit wildly different behaviors, we define the fraction of competent loci as

$$\text{fraction of competent loci} = \frac{\text{number of competent loci}}{\text{number of total loci}}. \quad (S22)$$

899 Thus, in this example in Figure S12A, the fraction of competent loci is approximately 0.8.

900 Figure S12B shows the measured fraction of active loci for all synthetic enhancer constructs in  
901 the presence and absence of Runt repressor. As seen in the figure, although this quantity can  
902 be modulated by the presence of Runt repressor, this is not always the case (e.g., [010] and [11]).  
903 Moreover, we could not find a trend for how the fraction of competent loci is modulated by different  
904 combinations of Runt binding sites. For example, the [100] construct alone did show a change in  
905 the fraction of active loci in the presence of Runt, whereas the [010] construct did not. When these  
906 two binding sites were combined as the [110], there was no significant modulation of the fraction  
907 of competent loci when adding Runt repressor. In another example, the [001] construct showed  
908 a mild modulation of the fraction of competent loci. However, when this Runt binding site was  
909 combined with the [010], which did not show any modulation, the [011] construct showed a much  
910 bigger modulation of the fraction of competent loci than the [001]. Thus, the [010] Runt binding  
911 site could drive more or less modulation of the fraction of competent loci when combined with  
912 different Runt binding sites in a context-dependent manner. As a result of our failure to uncover  
913 an apparent trend in terms of which regulatory architectures lead to a stronger modulation of the  
914 fraction of active loci, we did not attempt to theoretically explain the regulation of this fraction of  
915 active loci in this study.

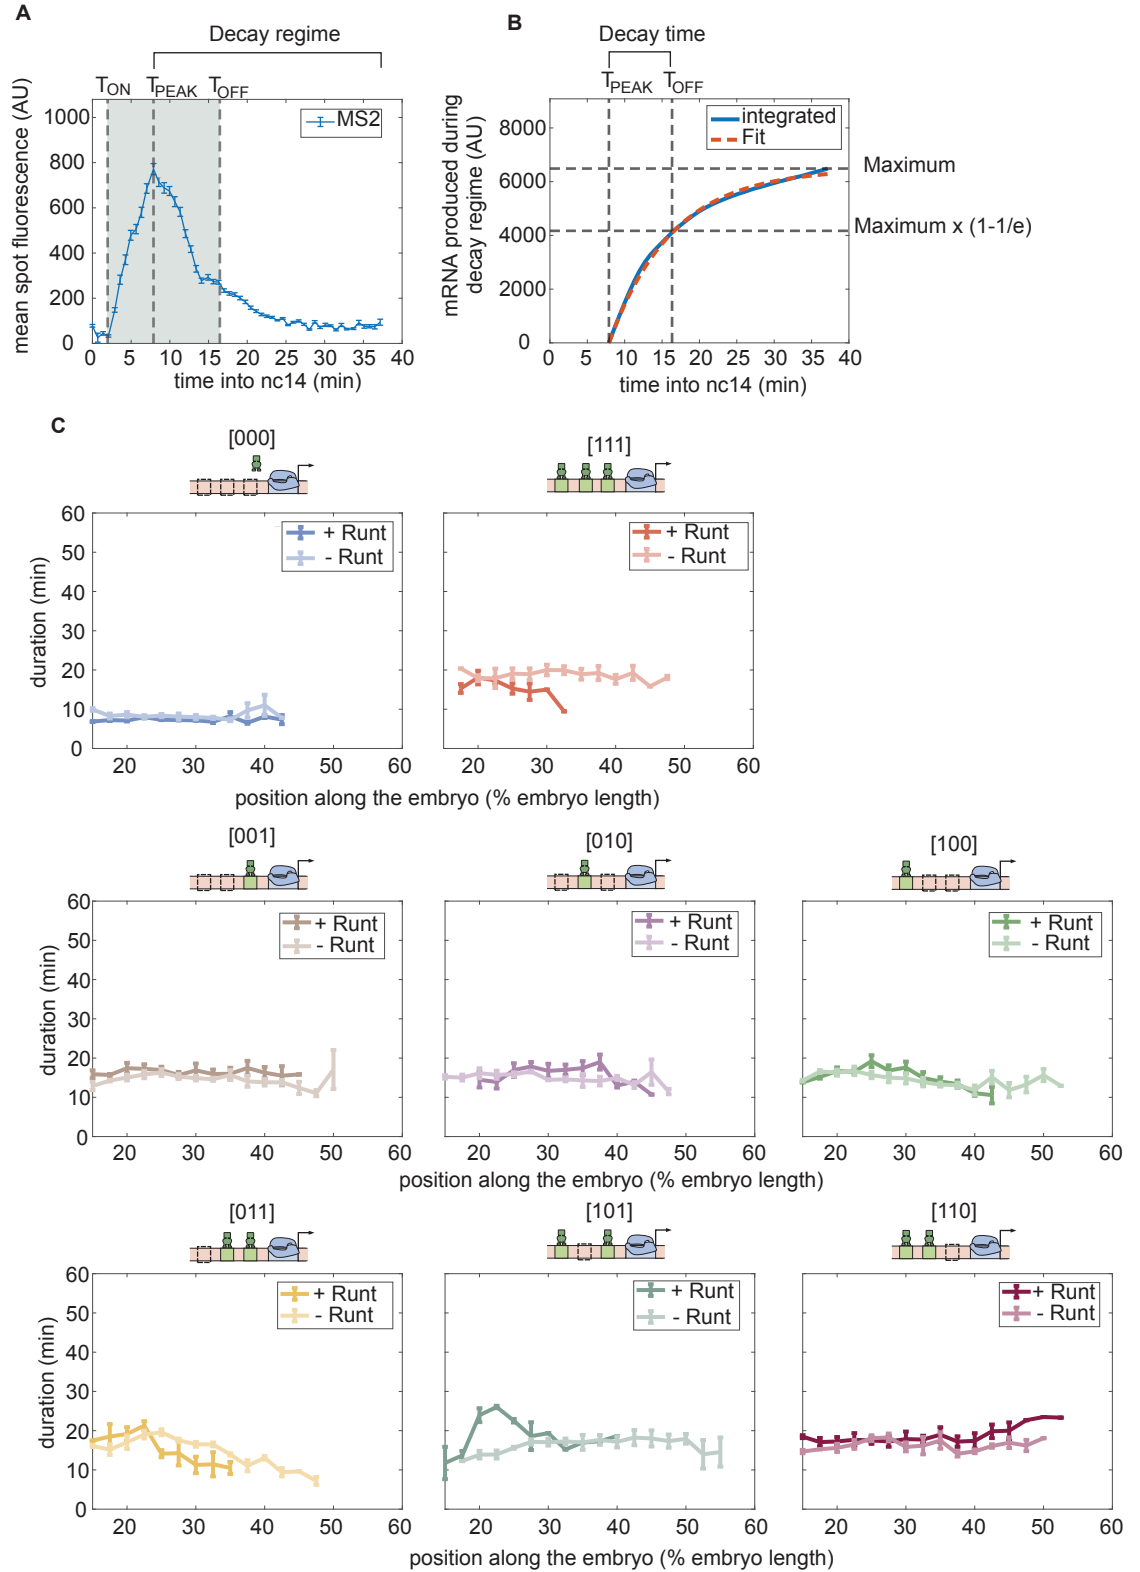

**Figure S11.** Duration of transcription over nc14. See Caption in the next page.

**Figure S11.** Duration of transcription over nc14. **(A)** An example MS2 time trace in nuclear cycle 14. The decay regime is defined from the peak of the signal to the end of the measurement.  $T_{ON}$  is defined by the x-intercept of the slope of the fitted line.  $T_{off}$  is determined by the decay time in the exponential function. The gray shaded region from  $T_{ON}$  to  $T_{OFF}$  is defined as the transcriptional time window. **(B)** The decay time can be extracted from the accumulated mRNA signal obtained by integrating the MS2 fluorescence. Here, decay time is defined as the time it takes to reach  $(1-1/e)$  of that maximum accumulated mRNA. **(C)** Transcriptional time window along the anterior-posterior axis for each construct with and without Runt protein. (A, error bars represent standard error of the mean over the spatial averaging corresponding to roughly ten nuclei; C, error bars represent standard error of the mean over  $\geq 3$  embryos.)

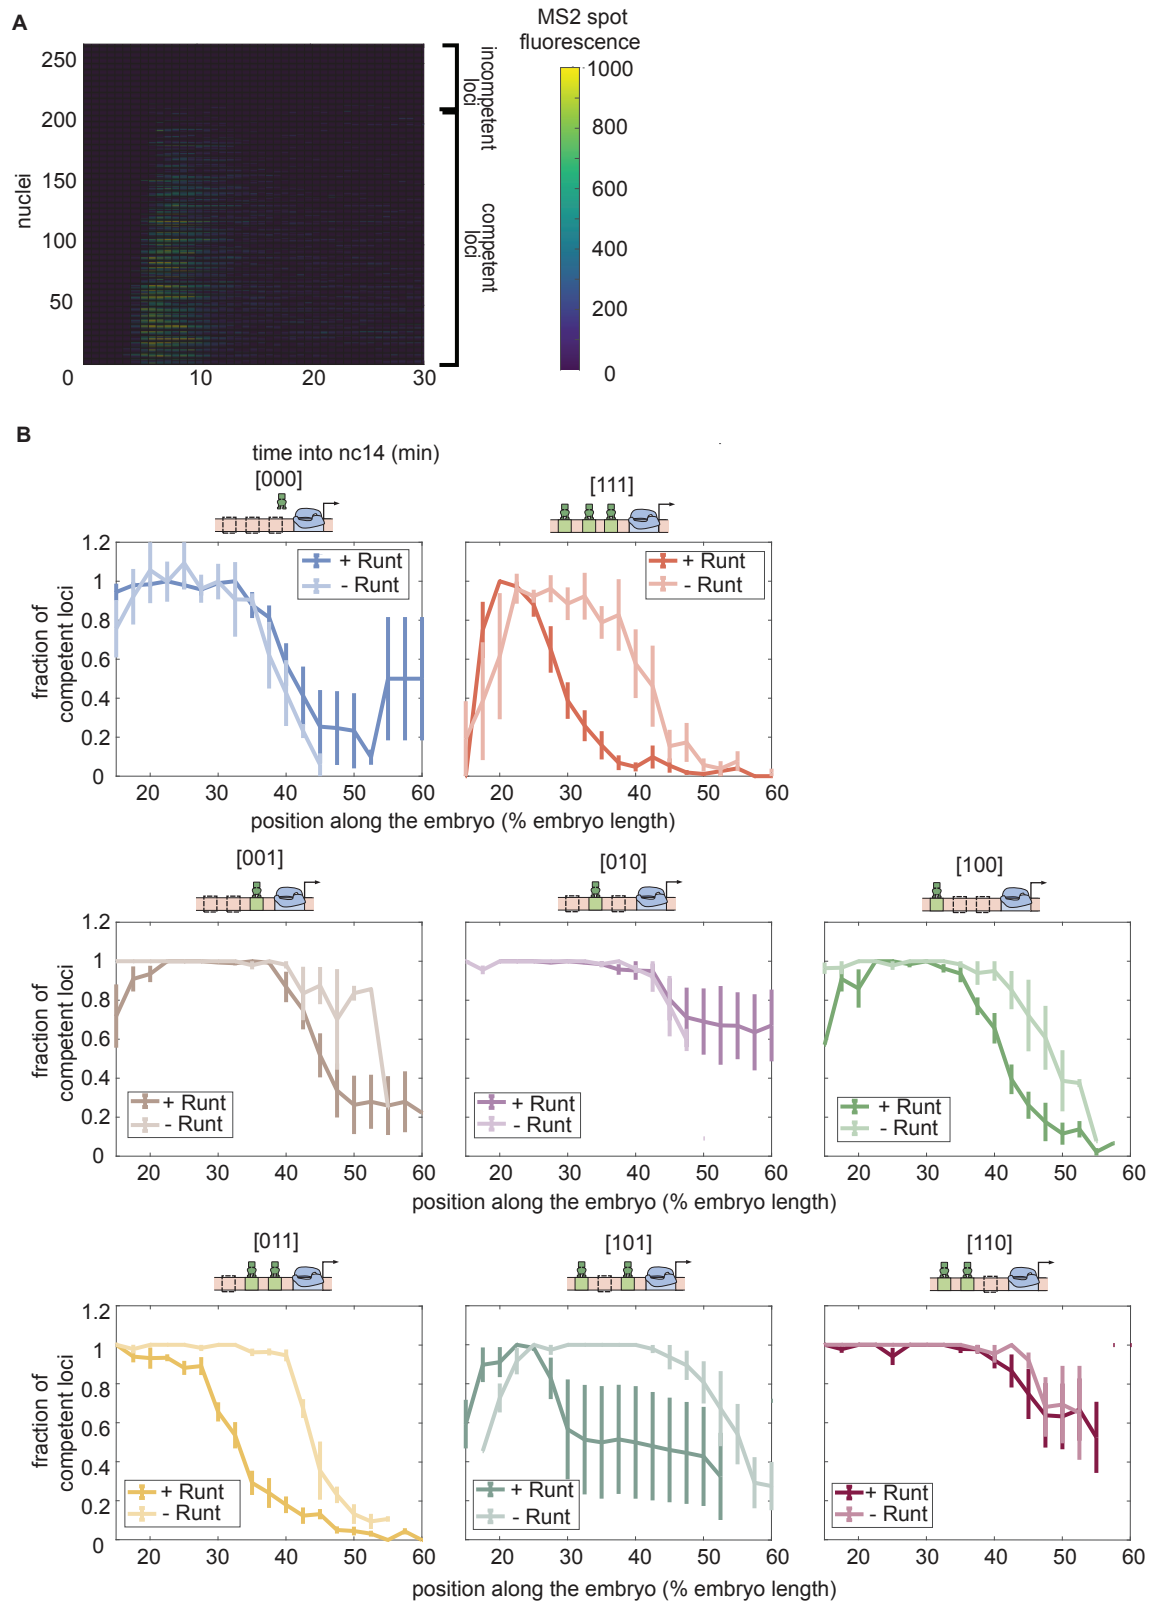

**Figure S12.** Fraction of competent loci in nuclear cycle 14 across the anterior-posterior axis for different constructs in the presence and absence of Runt protein. See caption in the next page.

**Figure S12.** Fraction of competent loci in nuclear cycle 14 along the anterior-posterior axis for each synthetic enhancer construct in the presence and absence of Runt protein. **(A)** Heatmap showing the transcriptional signal from the *hunchback* P2 enhancer for individual nuclei (rows) demonstrating that there are two populations of loci: transcriptionally active and inactive loci. **(B)** Fraction of transcriptionally active loci along the embryo for each construct for wild-type and *runt* null backgrounds. (B, error bars represent standard error of the mean over  $\geq 3$  embryos.)

916 **S9 Supplementary figures**

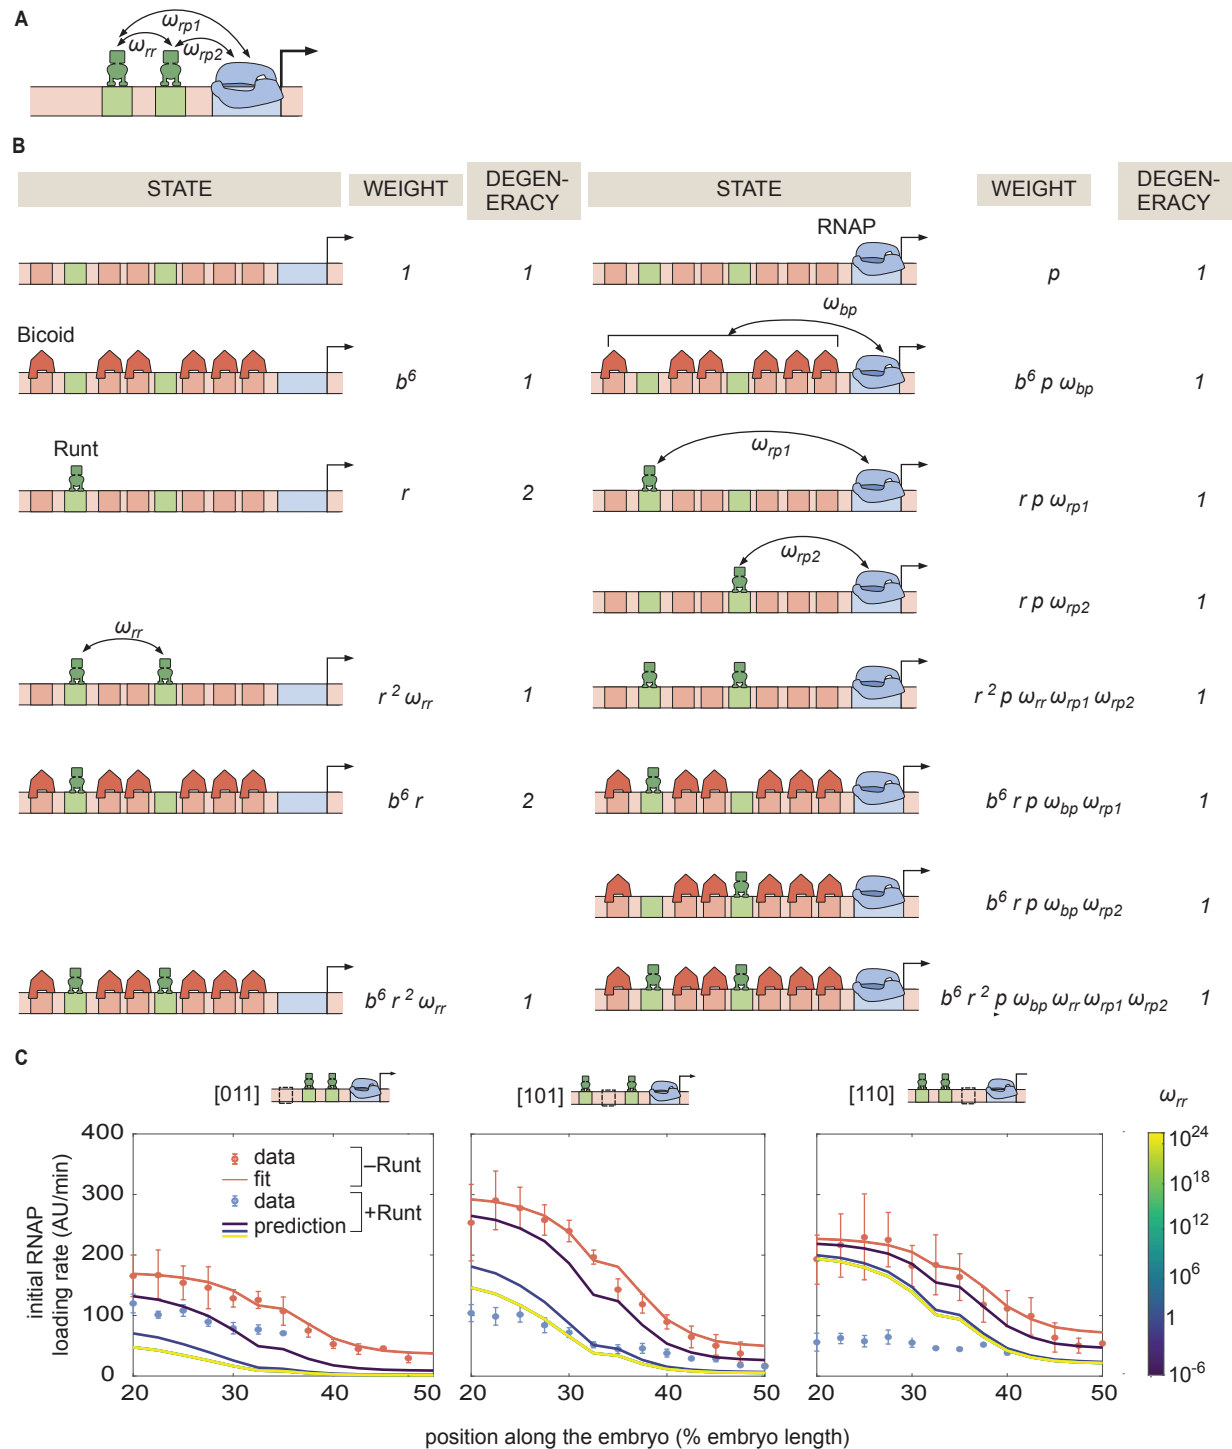

**Figure S13.** Invoking Runt-Runt cooperativity in the thermodynamic model is not sufficient to explain the experimental data from *hunchback* P2 with two Runt binding sites. **(A)** Model schematics where we add a new  $\omega_{rr}$  parameter representing Runt-Runt cooperativity. **(B)** Corresponding states and weights for *hunchback* P2 with two Runt binding sites in the presence of Runt-Runt cooperativity. **(C)** Prediction of the initial rate of RNAP loading profiles over a range of Runt-Runt cooperativity strength,  $\omega_{rr} = [10^{-6}, 10^{24}]$ , for all constructs of *hunchback* P2 with 2 Runt binding sites with different configurations. (Left) [011], (Center) [101], (Right) [110]. (C, error bars represent standard error of the mean over  $\geq 3$  embryos)

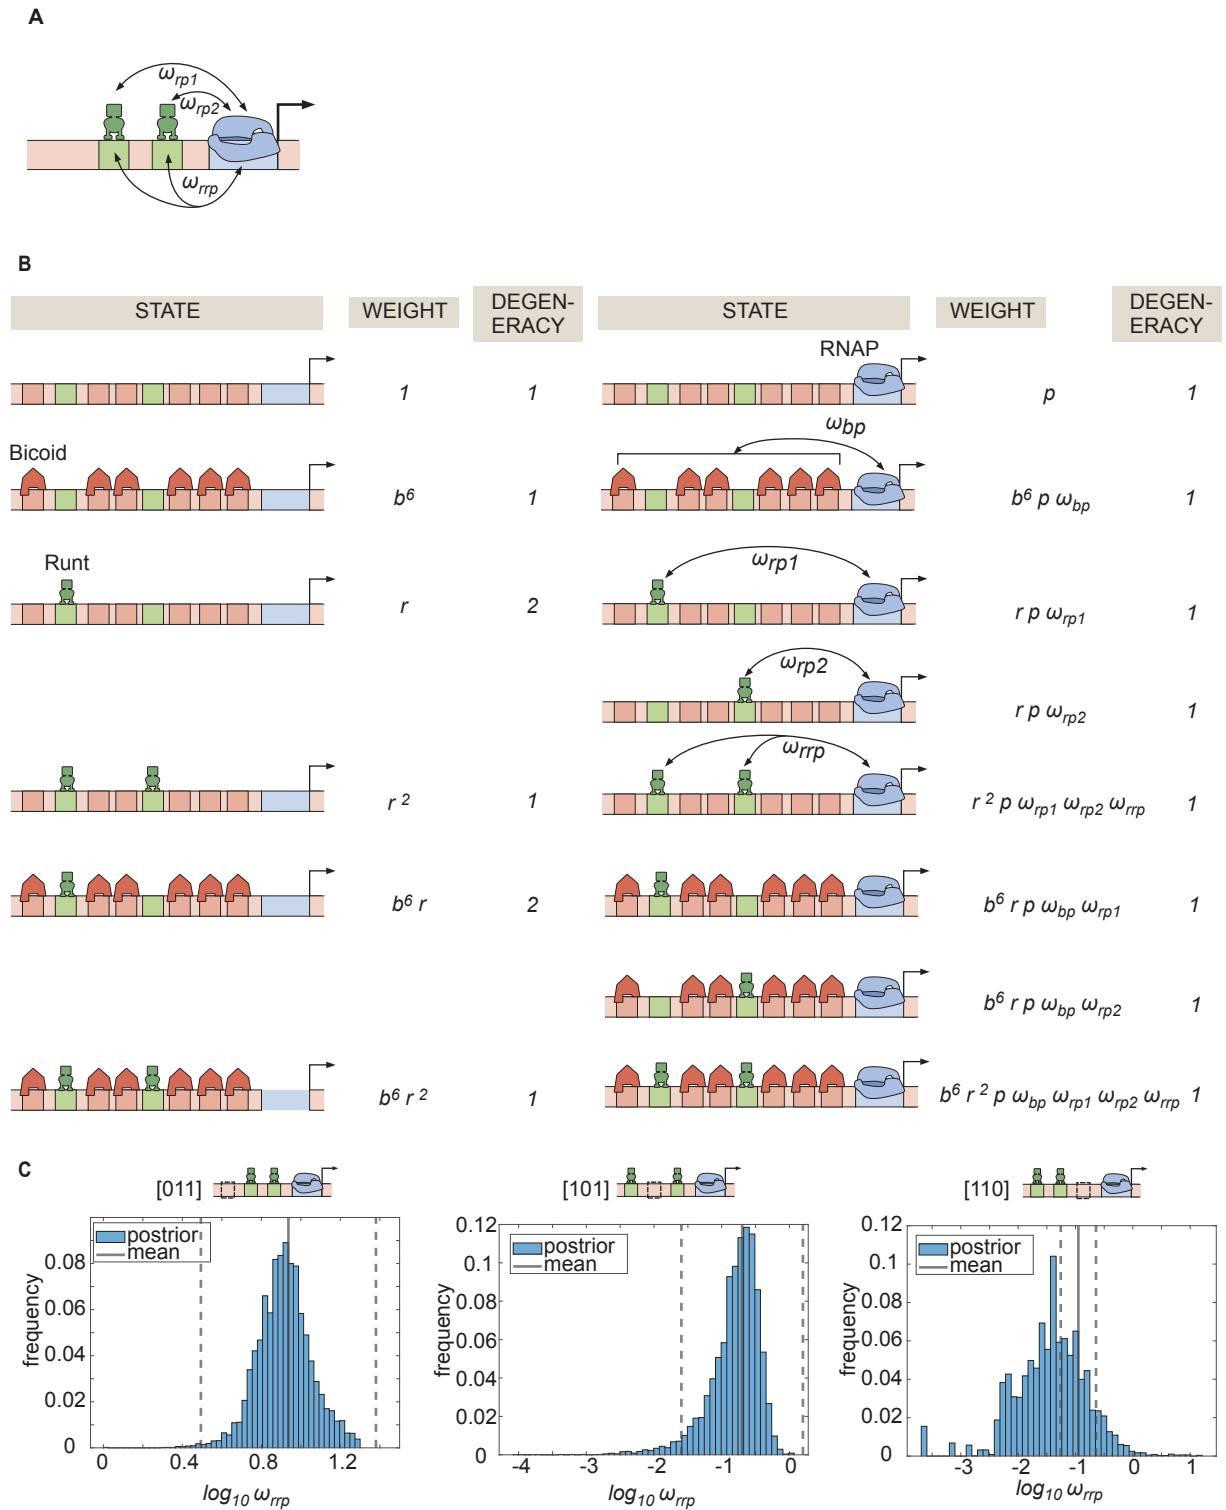

**Figure S14.** Invoking Runt-Runt-RNAP higher-order cooperativity is not sufficient to explain the two-Runt sites data. **(A)** Schematics of a model where we add Runt-Runt-RNAP higher-order cooperativity represented by  $\omega_{rrp}$ . **(B)** Thermodynamic model states and weights for *hunchback* P2 with two Runt binding sites in the presence of Runt-Runt-RNAP higher-order cooperativity. **(C)** Histograms showing the posterior distribution of the inferred  $\omega_{rrp}$  parameter from the best MCMC fit shown in Figure 6D. The black line represents the mean and the dotted lines represent standard deviation from the mean.



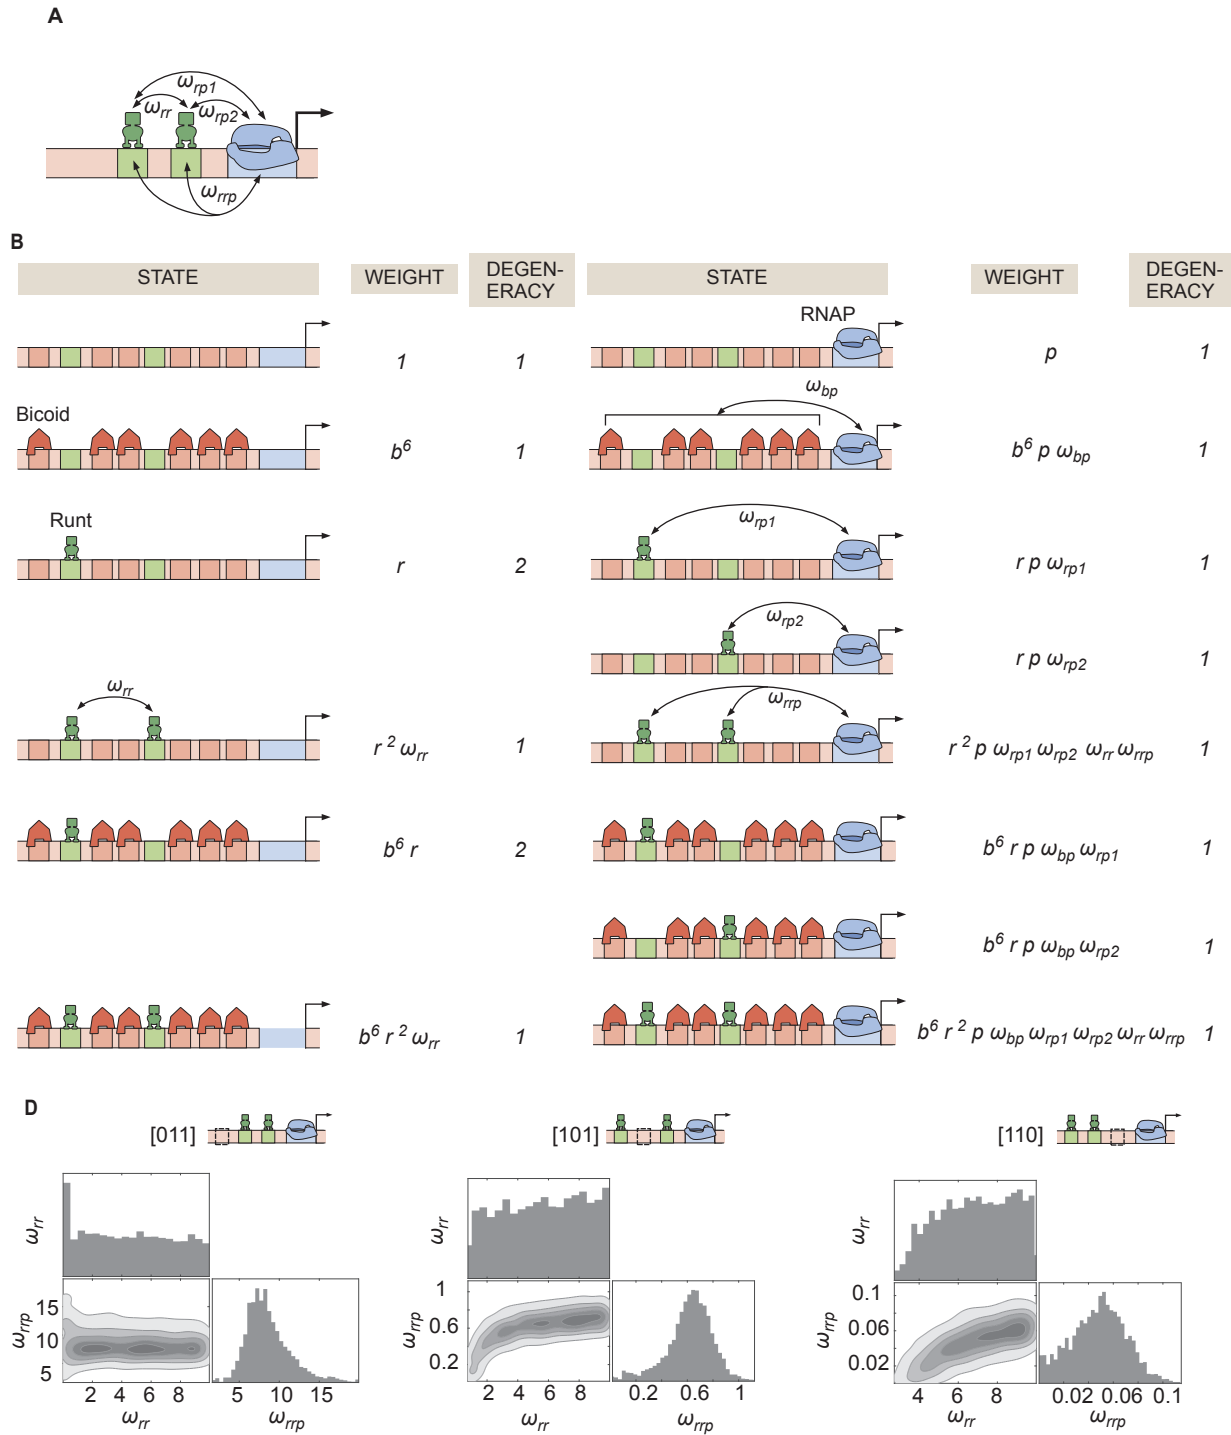

**Figure S15.** Invoking Runt-Runt cooperativity and higher-order cooperativity can explain the experimental data from *hunchback* P2 with two Runt binding sites. **(A)** Schematic showing Runt-Runt cooperativity and higher-order cooperativity. **(B)** States and weights for *hunchback* P2 with two Runt binding sites with Runt-Runt cooperativity and higher-order cooperativity. **(C)** Corner plots associated with the MCMC inference performed on two-Runt binding sites data from the best MCMC fit shown in Figure 6E. While  $\omega_{rr}$  is not very well constrained,  $\omega_{ho}$  shows a unique optimal value.

## 917 **S10 Supplementary videos**

918 For better quality of visualization, we recommend downloading these videos.

919 S1. **Video S1. eGFP-Bicoid confocal movie.** Confocal microscopy movie taken on a developing fly  
920 embryo (*eGFP-Bicoid; His2Av-mRFP; +*) during nuclear cycle 13 and 14.

921 S2. **Video S2. eGFP:LlamaTag-Runt confocal movie.** Confocal microscopy movie taken on a  
922 developing fly embryo (*eGFP-Bicoid; His2Av-mRFP; +*) during nuclear cycle 13 and 14.

923 S3. **Video S3. [001]-MS2V5:MCP-GFP (+Runt) confocal movie.** Confocal microscopy movie taken  
924 on a developing fly embryo (*yw; His2Av-mRFP; MCP-eGFP*) for the [001] construct with MS2  
925 reporter during nuclear cycle 13 and 14.

## 926 **References**

927 G. K. Ackers, A. D. Johnson, and M. A. Shea. Quantitative model for gene regulation by lambda phage repressor.  
928 *Proc Natl Acad Sci U S A*, 79(4):1129–33, 1982. ISSN 0027-8424 (Print).

929 Bruce Alberts. *Molecular biology of the cell*. Garland Science, Taylor and Francis Group, New York, NY, sixth  
930 edition. edition, 2015. ISBN 9780815344322 (hardcover) 0815344325 (hardcover) 9780815344643 (paperback)  
931 0815344643 (paperback) 9780815345244 (looseleaf) 0815345240 (looseleaf).

932 D. N. Arnosti, S. Barolo, M. Levine, and S. Small. The eve stripe 2 enhancer employs multiple modes of  
933 transcriptional synergy. *Development*, 122(1):205–14, 1996.

934 Kenneth A. Barr, Carlos Martinez, Jennifer R. Moran, Ah Ram Kim, Alexandre F. Ramos, and John Reinitz. Synthetic  
935 enhancer design by in silico compensatory evolution reveals flexibility and constraint in cis-regulation. *BMC*  
936 *Systems Biology*, 11(1):1–15, 2017. ISSN 17520509. doi: 10.1186/s12918-017-0485-2.

937 J. R. Bateman, A. M. Lee, and C. T. Wu. Site-specific transformation of drosophila via phic31 integrase-mediated  
938 cassette exchange. *Genetics*, 173(2):769–77, 2006. ISSN 0016-6731 (Print) 0016-6731 (Linking). doi: genetics.106.  
939 056945[pii]10.1534/genetics.106.056945.

940 E. Bertrand, P. Chartrand, M. Schaefer, S. M. Shenoy, R. H. Singer, and R. M. Long. Localization of ash1  
941 mrna particles in living yeast. *Mol Cell*, 2(4):437–45, 1998. ISSN 1097-2765 (Print) 1097-2765 (Linking). doi:  
942 S1097-2765(00)80143-4[pii].

943 J.W. Biddle, R. Martinez-Corral, F. Wong, and J. Gunawardena. Allosteric conformational ensembles have unlimited  
944 capacity for integrating information. *bioRxiv*, pages 1–58, 2020. ISSN 26928205. doi: 10.1101/2020.12.10.420117.

945 L. Bintu, N. E. Buchler, H. G. Garcia, U. Gerland, T. Hwa, J. Kondev, T. Kuhlman, and R. Phillips. Transcriptional  
946 regulation by the numbers: applications. *Curr Opin Genet Dev*, 15(2):125–35, 2005a.

947 L. Bintu, N. E. Buchler, H. G. Garcia, U. Gerland, T. Hwa, J. Kondev, and R. Phillips. Transcriptional regulation by  
948 the numbers: models. *Curr Opin Genet Dev*, 15(2):116–24, 2005b.

949 J. Q. Boedicker, H. G. Garcia, S. Johnson, and R. Phillips. Dna sequence-dependent mechanics and protein-  
950 assisted bending in repressor-mediated loop formation. *Phys Biol*, 10(6):066005, 2013a. ISSN 1478-3975  
951 (Electronic) 1478-3967 (Linking). doi: 10.1088/1478-3975/10/6/066005.

952 J. Q. Boedicker, H. G. Garcia, and R. Phillips. Theoretical and experimental dissection of dna loop-mediated  
953 repression. *Phys Rev Lett*, 110(1):018101, 2013b. ISSN 1079-7114 (Electronic) 0031-9007 (Linking). doi:  
954 10.1103/PhysRevLett.110.018101.

955 H. Bolouri and E. H. Davidson. Transcriptional regulatory cascades in development: initial rates, not steady state,  
956 determine network kinetics. *Proc Natl Acad Sci U S A*, 100(16):9371–6, 2003. ISSN 0027-8424 (Print) 0027-8424  
957 (Linking). doi: 10.1073/pnas.1533293100.

958 J. P. Bothma, J. Magliocco, and M. Levine. The snail repressor inhibits release, not elongation, of paused  
959 pol ii in the drosophila embryo. *Curr Biol*, 2011. ISSN 1879-0445 (Electronic) 0960-9822 (Linking). doi:  
960 10.1016/j.cub.2011.08.019.

- 961 J. P. Bothma, M. R. Norstad, S. Alamos, and H. G. Garcia. Llamatags: A versatile tool to image transcription  
962 factor dynamics in live embryos. *Cell*, 173(7):1810, 2018. ISSN 1097-4172 (Electronic) 0092-8674 (Linking). doi:  
963 10.1016/j.cell.2018.03.069.
- 964 R. C. Brewster, F. M. Weinert, H. G. Garcia, D. Song, M. Rydenfelt, and R. Phillips. The transcription factor titration  
965 effect dictates level of gene expression. *Cell*, 156(6):1312–23, 2014. ISSN 1097-4172 (Electronic) 0092-8674  
966 (Linking). doi: 10.1016/j.cell.2014.02.022.
- 967 James Briscoe and Stephen Small. Morphogen rules: Design principles of gradient-mediated embryo patterning.  
968 *Development (Cambridge)*, 142(23):3996–4009, 2015. ISSN 14779129. doi: 10.1242/dev.129452.
- 969 H. Chen, Z. Xu, C. Mei, D. Yu, and S. Small. A system of repressor gradients spatially organizes the boundaries of  
970 bicoid-dependent target genes. *Cell*, 149(3):618–29, 2012. ISSN 1097-4172 (Electronic) 0092-8674 (Linking).  
971 doi: 10.1016/j.cell.2012.03.018.
- 972 A. J. Courey and S. Jia. Transcriptional repression: the long and the short of it. *Genes Dev*, 15(21):2786–96, 2001.
- 973 J. Crocker, G. R. Ilesley, and D. L. Stern. Quantitatively predictable control of drosophila transcriptional enhancers  
974 in vivo with engineered transcription factors. *Nat Genet*, 48(3):292–8, 2016. ISSN 1546-1718 (Electronic)  
975 1061-4036 (Linking). doi: 10.1038/ng.3509.
- 976 I. B. Dodd, K. E. Shearwin, A. J. Perkins, T. Burr, A. Hochschild, and J. B. Egan. Cooperativity in long-range gene  
977 regulation by the lambda CI repressor. *Genes Dev*, 18(3):344–54, 2004.
- 978 W. Driever and C. Nusslein-Volhard. The bicoid protein determines position in the drosophila embryo in a  
979 concentration-dependent manner. *Cell*, 54(1):95–104, 1988. ISSN 0092-8674 (Print) 0092-8674 (Linking).
- 980 W. Driever and C. Nusslein-Volhard. The bicoid protein is a positive regulator of hunchback transcription in the  
981 early drosophila embryo. *Nature*, 337(6203):138–43, 1989. ISSN 0028-0836 (Print) 0028-0836 (Linking). doi:  
982 10.1038/337138a0.
- 983 W. Driever, G. Thoma, and C. Nusslein-Volhard. Determination of spatial domains of zygotic gene expression in  
984 the drosophila embryo by the affinity of binding sites for the bicoid morphogen. *Nature*, 340(6232):363–7,  
985 1989. ISSN 0028-0836 (Print) 0028-0836 (Linking). doi: 10.1038/340363a0.
- 986 J. Dufourt, A. Trullo, J. Hunter, C. Fernandez, J. Lazaro, M. Dejean, L. Morales, S. Nait-Amer, K. N. Schulz, M. M.  
987 Harrison, C. Favard, O. Radulescu, and M. Lagha. Temporal control of gene expression by the pioneer factor  
988 zelda through transient interactions in hubs. *Nat Commun*, 9(1):5194, 2018. ISSN 2041-1723 (Electronic)  
989 2041-1723 (Linking). doi: 10.1038/s41467-018-07613-z.
- 990 E. Eck, J. Liu, M. Kazemzadeh-Atoufi, S. Ghoreishi, S. A. Blythe, and H. G. Garcia. Quantitative dissection of  
991 transcription in development yields evidence for transcription factor-driven chromatin accessibility. *Elife*, 9:  
992 e56429, 2020. ISSN 2050-084X (Electronic) 2050-084X (Linking). doi: 10.7554/eLife.56429.
- 993 J. Estrada, T. Ruiz-Herrero, C. Scholes, Z. Wunderlich, and A. H. DePace. Siteout: An online tool to design binding  
994 site-free dna sequences. *PLoS One*, 11(3):e0151740, 2016a. ISSN 1932-6203 (Electronic) 1932-6203 (Linking).  
995 doi: 10.1371/journal.pone.0151740.
- 996 J. Estrada, F. Wong, A. DePace, and J. Gunawardena. Information integration and energy expenditure in gene  
997 regulation. *Cell*, 166(1):234–44, 2016b. ISSN 1097-4172 (Electronic) 0092-8674 (Linking). doi: 10.1016/j.cell.2016.  
998 06.012.
- 999 W. D. Fakhouri, A. Ay, R. Sayal, J. Dresch, E. Dayringer, and D. N. Arnosti. Deciphering a transcriptional regulatory  
1000 code: modeling short-range repression in the drosophila embryo. *Mol Syst Biol*, 6:341, 2010. ISSN 1744-4292  
1001 (Electronic) 1744-4292 (Linking). doi: msb200997[pil]10.1038/msb.2009.97.
- 1002 H. G. Garcia and R. Phillips. Quantitative dissection of the simple repression input-output function. *Proc Natl*  
1003 *Acad Sci U S A*, 108(29):12173–8, 2011. ISSN 1091-6490 (Electronic) 0027-8424 (Linking). doi: 1015616108[pil]10.  
1004 1073/pnas.1015616108.
- 1005 H. G. Garcia, A. Sanchez, J. Q. Boedicker, M. Osborne, J. Gelles, J. Kondev, and R. Phillips. Operator sequence  
1006 alters gene expression independently of transcription factor occupancy in bacteria. *Cell Rep*, 2(1):150–61,  
1007 2012. ISSN 2211-1247 (Electronic). doi: 10.1016/j.celrep.2012.06.004.

- 1008 Hernan G Garcia, Mikhail Tikhonov, Albert Lin, and Thomas Gregor. Quantitative Imaging of Transcription in  
1009 Living Drosophila Embryos Links Polymerase Activity to Patterning, 2013. ISSN 09609822.
- 1010 Hernan G. Garcia, Augusto Berrocal, Yang Joon Kim, Gabriella Martini, and Jiayi Zhao. Lighting up the central  
1011 dogma for predictive developmental biology. In *Current Topics in Developmental Biology*, volume 137, pages  
1012 1–35. Academic Press Inc., 1 2020. ISBN 9780128127902. doi: 10.1016/bs.ctdb.2019.10.010.
- 1013 J. P. Gergen and B. A. Butler. Isolation of the Drosophila segmentation gene runt and analysis of its expression  
1014 during embryogenesis. *Genes & development*, 2(9):1179–1193, 1988. ISSN 08909369. doi: 10.1101/gad.2.9.1179.
- 1015 Charles J. Geyer and Elizabeth A. Thompson. Constrained Monte Carlo Maximum Likelihood for Dependent  
1016 Data. *Journal of the Royal Statistical Society: Series B (Methodological)*, 54(3):657–683, 1992. ISSN 0035-9246. doi:  
1017 10.1111/j.2517-6161.1992.tb01443.x.
- 1018 E. Giniger and M. Ptashne. Cooperative dna binding of the yeast transcriptional activator gal4. *Proc Natl Acad Sci*  
1019 *U S A*, 85(2):382–6, 1988. ISSN 0027-8424 (Print).
- 1020 S. J. Gratz, C. D. Rubinstein, M. M. Harrison, J. Wildonger, and K. M. O'Connor-Giles. Crispr-cas9 genome editing  
1021 in drosophila. *Curr Protoc Mol Biol*, 111:31 2 1–20, 2015. ISSN 1934-3647 (Electronic) 1934-3647 (Linking). doi:  
1022 10.1002/0471142727.mb3102s111.
- 1023 S. Gray, P. Szymanski, and M. Levine. Short-range repression permits multiple enhancers to function au-  
1024 tonomously within a complex promoter. *Genes Dev*, 8(15):1829–1838, 1994. ISSN 0890-9369.
- 1025 T. Gregor, D. W. Tank, E. F. Wieschaus, and W. Bialek. Probing the limits to positional information. *Cell*, 130(1):  
1026 153–64, 2007. ISSN 0092-8674 (Print).
- 1027 Heikki Haario, Eero Saksman, and Johanna Tamminen. An Adaptive Metropolis Algorithm. *Bernoulli*, 7(2):223–242,  
1028 2001. ISSN 13507265. URL <http://www.jstor.org/stable/3318737>.
- 1029 Heikki Haario, Marko Laine, Antonietta Mira, and Eero Saksman. DRAM: Efficient adaptive MCMC. *Statistics and*  
1030 *Computing*, 16(4):339–354, 2006. ISSN 1573-1375. doi: 10.1007/s11222-006-9438-0. URL <https://doi.org/10.1007/s11222-006-9438-0>.
- 1031
- 1032 Saiyu Hang and J. Peter Gergen. Different modes of enhancer-specific regulation by Runt and Even-skipped  
1033 during Drosophila segmentation. *Molecular Biology of the Cell*, 28(5):681–691, 2017. ISSN 19394586. doi:  
1034 10.1091/mbc.E16-09-0630.
- 1035 M. M. Harrison, M. R. Botchan, and T. W. Cline. Grainyhead and zelda compete for binding to the promoters of  
1036 the earliest-expressed drosophila genes. *Dev Biol*, 345(2):248–55, 2010. ISSN 1095-564X (Electronic) 0012-1606  
1037 (Linking). doi: 10.1016/j.ydbio.2010.06.026.
- 1038 H. H. He, C. A. Meyer, H. Shin, S. T. Bailey, G. Wei, Q. Wang, Y. Zhang, K. Xu, M. Ni, M. Lupien, P. Mieczkowski, J. D.  
1039 Lieb, K. Zhao, M. Brown, and X. S. Liu. Nucleosome dynamics define transcriptional enhancers. *Nat Genet*, 42  
1040 (4):343–7, 2010. ISSN 1546-1718 (Electronic) 1061-4036 (Linking). doi: 10.1038/ng.545.
- 1041 Gerald Z. Hertz and Gary D. Stormo. Identifying DNA and protein patterns with statistically significant alignments  
1042 of multiple sequences. *Bioinformatics*, 15(7-8):563–577, 1999. ISSN 13674803. doi: 10.1093/bioinformatics/15.7.  
1043 563.
- 1044 Gerald Z. Hertz, George W. Hartzell, and Gary D. Stormo. Identification of consensus patterns in unaligned  
1045 DNA sequences known to be functionally related. *Bioinformatics*, 6(2):81–92, 1990. ISSN 13674803. doi:  
1046 10.1093/bioinformatics/6.2.81.
- 1047 G. F. Hewitt, B. S. Strunk, C. Margulies, T. Priputin, X. D. Wang, R. Amey, B. A. Pabst, D. Kosman, J. Reinitz, and  
1048 D. N. Arnosti. Transcriptional repression by the drosophila giant protein: cis element positioning provides an  
1049 alternative means of interpreting an effector gradient. *Development*, 126(6):1201–10, 1999. ISSN 0950-1991  
1050 (Print) 0950-1991 (Linking).
- 1051 Y. T. Ip, R. E. Park, D. Kosman, K. Yazdanbakhsh, and M. Levine. dorsal-twist interactions establish snail expression  
1052 in the presumptive mesoderm of the drosophila embryo. *Genes Dev*, 6(8):1518–30, 1992. ISSN 0890-9369  
1053 (Print) 0890-9369 (Linking).

- 1054 J. B. Jaynes and P. H. O'Farrell. Active repression of transcription by the Engrailed homeodomain protein. *EMBO*  
1055 *Journal*, 10(6):1427–1433, 1991. ISSN 02614189. doi: 10.1002/j.1460-2075.1991.tb07663.x.
- 1056 J. Jiang and M. Levine. Binding affinities and cooperative interactions with bhlh activators delimit threshold  
1057 responses to the dorsal gradient morphogen. *Cell*, 72(5):741–52, 1993. ISSN 0092-8674 (Print) 0092-8674  
1058 (Linking).
- 1059 Theodora Koromila and Angelike Stathopoulos. Broadly expressed repressors integrate patterning across  
1060 orthogonal axes in embryos. *Proceedings of the National Academy of Sciences*, (6):201703001, 2017. ISSN  
1061 0027-8424. doi: 10.1073/pnas.1703001114. URL <http://www.pnas.org/lookup/doi/10.1073/pnas.1703001114>.
- 1062 Theodora Koromila and Angelike Stathopoulos. Distinct Roles of Broadly Expressed Repressors Support  
1063 Dynamic Enhancer Action and Change in Time. *Cell Reports*, 28(4):855–863, 2019. ISSN 22111247. doi:  
1064 10.1016/j.celrep.2019.06.063. URL <https://doi.org/10.1016/j.celrep.2019.06.063>.
- 1065 M. M. Kulkarni and D. N. Arnosti. cis-regulatory logic of short-range transcriptional repression in *drosophila*  
1066 *melanogaster*. *Mol Cell Biol*, 25(9):3411–20, 2005. ISSN 0270-7306 (Print).
- 1067 N. C. Lammers, V. Galstyan, A. Reimer, S. A. Medin, C. H. Wiggins, and H. G. Garcia. Multimodal transcriptional  
1068 control of pattern formation in embryonic development. *Proc Natl Acad Sci U S A*, 117(2):836–847, 2020. ISSN  
1069 1091-6490 (Electronic) 0027-8424 (Linking). doi: 10.1073/pnas.1912500117.
- 1070 D. Lebrecht, M. Foehr, E. Smith, F. J. Lopes, C. E. Vanario-Alonso, J. Reinitz, D. S. Burz, and S. D. Hanes. Bicoid  
1071 cooperative dna binding is critical for embryonic patterning in drosophila. *Proc Natl Acad Sci U S A*, 102(37):  
1072 13176–81, 2005. ISSN 0027-8424 (Print) 0027-8424 (Linking). doi: 10.1073/pnas.0506462102.
- 1073 C. Li, F. Cesbron, M. Oehler, M. Brunner, and T. Hofer. Frequency modulation of transcriptional bursting enables  
1074 sensitive and rapid gene regulation. *Cell Syst*, 6(4):409–423 e11, 2018. ISSN 2405-4712 (Print) 2405-4712  
1075 (Linking). doi: 10.1016/j.cels.2018.01.012.
- 1076 J. Li and D. S. Gilmour. Promoter proximal pausing and the control of gene expression. *Curr Opin Genet Dev*, 21  
1077 (2):231–5, 2011. ISSN 1879-0380 (Electronic) 0959-437X (Linking). doi: S0959-437X(11)00014-1[pii]10.1016/j.gde.  
1078 2011.01.010.
- 1079 Jonathan Liu, Donald Hansen, Elizabeth Eck, Yang Joon Kim, Meghan Turner, Simon Alamos, and Hernan G.  
1080 Garcia. Real-time single-cell characterization of the eukaryotic transcription cycle reveals correlations between  
1081 RNA initiation, elongation, and cleavage. *bioRxiv*, page 2020.08.29.273474, 2021. ISSN 26928205. doi:  
1082 10.1371/journal.pcbi.1008999. URL <https://www.biorxiv.org/content/10.1101/2020.08.29.273474v4%0Ahttps://www.biorxiv.org/content/10.1101/2020.08.29.273474v4.abstract>.
- 1084 Ulrike Löhr, Ho Ryun Chung, Mathias Beller, and Herbert Jäckle. Antagonistic action of Bicoid and the repressor  
1085 Capicua determines the spatial limits of *Drosophila* head gene expression domains. *Proceedings of the*  
1086 *National Academy of Sciences of the United States of America*, 106(51):21695–21700, 2009. ISSN 00278424. doi:  
1087 10.1073/pnas.0910225106.
- 1088 Susan E. Lott, Jacqueline E. Villalta, Gary P. Schroth, Shujun Luo, Leath A. Tonkin, and Michael B. Eisen. Non-  
1089 canonical compensation of zygotic X transcription in early *Drosophila melanogaster* development revealed  
1090 through single-embryo RNA-Seq. *PLoS Biology*, 9(2), 2011. ISSN 15449173. doi: 10.1371/journal.pbio.1000590.
- 1091 T. Lucas, T. Ferraro, B. Roelens, J. De Las Heras Chanes, A. M. Walczak, M. Coppey, and N. Dostatni. Live imaging  
1092 of bicoid-dependent transcription in *drosophila* embryos. *Curr Biol*, 23(21):2135–9, 2013. ISSN 1879-0445  
1093 (Electronic) 0960-9822 (Linking). doi: 10.1016/j.cub.2013.08.053.
- 1094 D. Ma, M. Alberti, C. Lynch, H. Nikaido, and J. E. Hearst. The local repressor acrr plays a modulating role in the  
1095 regulation of acrab genes of *escherichia coli* by global stress signals. *Mol Microbiol*, 19(1):101–12, 1996. ISSN  
1096 0950-382X (Print) 0950-382X (Linking).
- 1097 Jürgen Mayer, Khaled Khairy, and Jonathon Howard. Drawing an elephant with four complex parameters.  
1098 *American Journal of Physics*, 78(6):648–649, 2010. ISSN 0002-9505. doi: 10.1119/1.3254017.
- 1099 Aikaterini Papagianni, Marta Forés, Wanqing Shao, Shuonan He, Nina Koenecke, María José Andreu, Núria  
1100 Samper, Ze'ev Paroush, Sergio González-Crespo, Julia Zeitlinger, and Gerardo Jiménez. Capicua controls  
1101 Toll/IL-1 signaling targets independently of RTK regulation. *Proceedings of the National Academy of Sciences*,  
1102 115(8):201713930, 2018. ISSN 0027-8424. doi: 10.1073/pnas.1713930115. URL [http://www.pnas.org/lookup/doi/](http://www.pnas.org/lookup/doi/10.1073/pnas.1713930115)  
1103 [10.1073/pnas.1713930115](http://www.pnas.org/lookup/doi/10.1073/pnas.1713930115).

- 1104 J. Park, J. Estrada, G. Johnson, B. J. Vincent, C. Ricci-Tam, M. D. Bragdon, Y. Shulgina, A. Cha, Z. Wunderlich,  
1105 J. Gunawardena, and A. H. DePace. Dissecting the sharp response of a canonical developmental enhancer  
1106 reveals multiple sources of cooperativity. *Elife*, 8, 2019. ISSN 2050-084X (Electronic) 2050-084X (Linking). doi:  
1107 10.7554/eLife.41266.
- 1108 D. S. Parker, M. A. White, A. I. Ramos, B. A. Cohen, and S. Barolo. The cis-regulatory logic of hedgehog gradient  
1109 responses: key roles for gli binding affinity, competition, and cooperativity. *Sci Signal*, 4(176):ra38, 2011. ISSN  
1110 1937-9145 (Electronic). doi: 10.1126/scisignal.2002077.
- 1111 Eveline Peeters, Liesbeth Van Oeffelen, Marc Nadal, Patrick Forterre, and Daniel Charlier. A thermodynamic  
1112 model of the cooperative interaction between the archaeal transcription factor Ss-LrpB and its tripartite  
1113 operator DNA. *Gene*, 524(2):330–340, 2013. ISSN 03781119. doi: 10.1016/j.gene.2013.03.118. URL <http://dx.doi.org/10.1016/j.gene.2013.03.118>.
- 1115 R. Phillips, N. M. Belliveau, G. Chure, H. G. Garcia, M. Razo-Mejia, and C. Scholes. Figure 1 theory meets figure 2  
1116 experiments in the study of gene expression. *Annu Rev Biophys*, 48:121–163, 2019. ISSN 1936-1238 (Electronic)  
1117 1936-122X (Linking). doi: 10.1146/annurev-biophys-052118-115525.
- 1118 Rob Phillips, Jane Kondev, and Julie Theriot. *Physical biology of the cell*. Garland Science, New York, 2009. ISBN  
1119 9780815341635 0815341636.
- 1120 M. Ptashne and A. Gann. *Genes and Signals*. Cold Spring Harbor Laboratory Press, New York, 2002.
- 1121 Mark Ptashne. *A genetic switch: phage lambda revisited*. Cold Spring Harbor Laboratory Press, Cold Spring Harbor,  
1122 N.Y., 3rd edition, 2004. ISBN 0879697172 (cloth) 0879697164 (pbk. alk. paper).
- 1123 M. Razo-Mejia, S. L. Barnes, N. M. Belliveau, G. Chure, T. Einav, M. Lewis, and R. Phillips. Tuning transcriptional  
1124 regulation through signaling: A predictive theory of allosteric induction. *Cell Syst*, 6(4):456–469 e10, 2018.  
1125 ISSN 2405-4712 (Print) 2405-4712 (Linking). doi: 10.1016/j.cels.2018.02.004.
- 1126 M. Razo-Mejia, S. Marzen, G. Chure, R. Taubman, M. Morrison, and R. Phillips. First-principles prediction of the  
1127 information processing capacity of a simple genetic circuit. *Phys Rev E*, 102(2-1):022404, 2020. ISSN 2470-0053  
1128 (Electronic) 2470-0045 (Linking). doi: 10.1103/PhysRevE.102.022404.
- 1129 Armando Reimer, Simon Alamos, Clay Westrum, Meghan A Turner, Jiayi Zhao, and Hernan G Garcia. Minimal  
1130 synthetic enhancers reveal control of the probability of transcriptional engagement and its timing by a  
1131 morphogen gradient. pages 1–41, 2021.
- 1132 John Rivera, Soile V.E. Keränen, Steven M. Gallo, and Marc S. Halfon. REDfly: The transcriptional regulatory  
1133 element database for Drosophila. *Nucleic Acids Research*, 47(D1):D828–D834, 2019. ISSN 13624962. doi:  
1134 10.1093/nar/gky957.
- 1135 F. Sauer and H. Jackle. Concentration-dependent transcriptional activation or repression by kruppel from a single  
1136 binding site. *Nature*, 353(6344):563–6, 1991. ISSN 0028-0836 (Print) 0028-0836 (Linking). doi: 10.1038/353563a0.
- 1137 R. Sayal, J. M. Dresch, I. Pushel, B. R. Taylor, and D. N. Arnosti. Quantitative perturbation-based analysis of gene  
1138 expression predicts enhancer activity in early drosophila embryo. *Elife*, 5, 2016. ISSN 2050-084X (Electronic)  
1139 2050-084X (Linking). doi: 10.7554/eLife.08445.
- 1140 E. Segal, T. Raveh-Sadka, M. Schroeder, U. Unnerstall, and U. Gaul. Predicting expression patterns from regulatory  
1141 sequence in drosophila segmentation. *Nature*, 451(7178):535–40, 2008. ISSN 1476-4687 (Electronic). doi:  
1142 nature06496[pii]10.1038/nature06496.
- 1143 L. A. Sepulveda, H. Xu, J. Zhang, M. Wang, and I. Golding. Measurement of gene regulation in individual  
1144 cells reveals rapid switching between promoter states. *Science*, 351(6278):1218–22, 2016. ISSN 1095-9203  
1145 (Electronic) 0036-8075 (Linking). doi: 10.1126/science.aad0635.
- 1146 D. Sivia and J. Skilling. *Data Analysis: A Bayesian Tutorial*. OUP Oxford, 2006. ISBN 9780191546709.
- 1147 S. Small, A. Blair, and M. Levine. Regulation of even-skipped stripe 2 in the drosophila embryo. *EMBO J*, 11(11):  
1148 4047–57, 1992.
- 1149 Stephen Small and David N. Arnosti. Transcriptional enhancers in Drosophila. *Genetics*, 216(1):1–26, 2020. ISSN  
1150 19432631. doi: 10.1534/genetics.120.301370.

- 1151 F. Spitz and E. E. Furlong. Transcription factors: from enhancer binding to developmental control. *Nat Rev Genet*,  
1152 13(9):613–26, 2012. ISSN 1471-0064 (Electronic) 1471-0056 (Linking). doi: 10.1038/nrg3207.
- 1153 J. M. Vilar and S. Leibler. Dna looping and physical constraints on transcription regulation. *J Mol Biol*, 331(5):  
1154 981–9, 2003.
- 1155 B. J. Vincent, J. Estrada, and A. H. DePace. The appeasement of doug: a synthetic approach to enhancer biology.  
1156 *Integr Biol (Camb)*, 8(4):475–84, 2016. ISSN 1757-9708 (Electronic) 1757-9694 (Linking). doi: 10.1039/c5ib00321k.
- 1157 Pegine B. Walrad, Saiyu Hang, and J. Peter Gergena. Hairless is a cofactor for Runt-dependent transcriptional  
1158 regulation. *Molecular Biology of the Cell*, 22(8):1364–1374, 2011. ISSN 10591524. doi: 10.1091/mbc.E10-06-0483.
- 1159 B. Wu, V. Miskolci, H. Sato, E. Tutucci, C. A. Kenworthy, S. K. Donnelly, Y. J. Yoon, D. Cox, R. H. Singer, and  
1160 L. Hodgson. Synonymous modification results in high-fidelity gene expression of repetitive protein and  
1161 nucleotide sequences. *Genes Dev*, 29(8):876–86, 2015. ISSN 1549-5477 (Electronic) 0890-9369 (Linking). doi:  
1162 10.1101/gad.259358.115.
